# Supplementary material for: Prevalence and Distribution of Avian Influenza Viruses in Domestic Ducks at the Waterfowl-Chicken Interface in Wetlands
Source: Pathogens. 2020 Nov 16;9(11):953. doi: 10.3390/pathogens9110953 (PMC7709030; doi:10.3390/pathogens9110953)
Supplement: Supplementary file 1 [file pathogens-09-00953-s001.xls]

## Sheet: AI_2015-2017
Serial Number	Sample ID	Sample material	Year	Collection Site	Location	Collection City	Collection_Country	Collector Institution	Host_Species	Host_Common_Name	Host_Health	Host_Natural_State	Host Age	Host Sex	Host_Capture_Status	Host contact type	flock/household number	flock size	flock owner's eduction	Influenza_Test_Type	Influenza_Test_Result	Influenza_Test_Type	Influenza_Test_Result	comments
1	1	Blood, Oropharyngeal swab and cloacal swabs	2015	Hakaluki wetland	Bhatera	Sylhet	Bangladesh	Chattogram Veterinary and Animal Sciences University	Anas platyrhynchos domesticus	Domestic duck	Healthy	Active surveillance	Undefined	Adult	Free-range domestic	waterfowl	1	328	Literate	real-time RT-PCR	Negative	cELISA	Positive
2	2	Blood, Oropharyngeal swab and cloacal swabs	2015	Hakaluki wetland	Bhatera	Sylhet	Bangladesh	Chattogram Veterinary and Animal Sciences University	Anas platyrhynchos domesticus	Domestic duck	Healthy	Active surveillance	Undefined	Adult	Free-range domestic	waterfowl	1	328	Literate	real-time RT-PCR	Negative	cELISA	Positive
3	3	Blood, Oropharyngeal swab and cloacal swabs	2015	Hakaluki wetland	Bhatera	Sylhet	Bangladesh	Chattogram Veterinary and Animal Sciences University	Anas platyrhynchos domesticus	Domestic duck	Healthy	Active surveillance	Undefined	Adult	Free-range domestic	waterfowl	1	328	Literate	real-time RT-PCR	Negative	cELISA	Positive
4	4	Blood, Oropharyngeal swab and cloacal swabs	2015	Hakaluki wetland	Bhatera	Sylhet	Bangladesh	Chattogram Veterinary and Animal Sciences University	Anas platyrhynchos domesticus	Domestic duck	Healthy	Active surveillance	Undefined	Adult	Free-range domestic	waterfowl	1	328	Literate	real-time RT-PCR	Negative	cELISA	Positive
5	5	Blood, Oropharyngeal swab and cloacal swabs	2015	Hakaluki wetland	Bhatera	Sylhet	Bangladesh	Chattogram Veterinary and Animal Sciences University	Anas platyrhynchos domesticus	Domestic duck	Healthy	Active surveillance	Undefined	Adult	Free-range domestic	waterfowl	1	328	Literate	real-time RT-PCR	Negative	cELISA	Positive
6	6	Blood, Oropharyngeal swab and cloacal swabs	2015	Hakaluki wetland	Bhatera	Sylhet	Bangladesh	Chattogram Veterinary and Animal Sciences University	Anas platyrhynchos domesticus	Domestic duck	Healthy	Active surveillance	Undefined	Adult	Free-range domestic	waterfowl	2	400	Illitarate	real-time RT-PCR	Negative	cELISA	Negative
7	7	Blood, Oropharyngeal swab and cloacal swabs	2015	Hakaluki wetland	Bhatera	Sylhet	Bangladesh	Chattogram Veterinary and Animal Sciences University	Anas platyrhynchos domesticus	Domestic duck	Healthy	Active surveillance	Undefined	Adult	Free-range domestic	waterfowl	2	400	Illitarate	real-time RT-PCR	Negative	cELISA	Positive
8	8	Blood, Oropharyngeal swab and cloacal swabs	2015	Hakaluki wetland	Bhatera	Sylhet	Bangladesh	Chattogram Veterinary and Animal Sciences University	Anas platyrhynchos domesticus	Domestic duck	Healthy	Active surveillance	Undefined	Adult	Free-range domestic	waterfowl	2	400	Illitarate	real-time RT-PCR	Negative	cELISA	Positive
9	9	Blood, Oropharyngeal swab and cloacal swabs	2015	Hakaluki wetland	Bhatera	Sylhet	Bangladesh	Chattogram Veterinary and Animal Sciences University	Anas platyrhynchos domesticus	Domestic duck	Healthy	Active surveillance	Undefined	Adult	Free-range domestic	waterfowl	2	400	Illitarate	real-time RT-PCR	Negative	cELISA	Positive
10	10	Blood, Oropharyngeal swab and cloacal swabs	2015	Hakaluki wetland	Bhatera	Sylhet	Bangladesh	Chattogram Veterinary and Animal Sciences University	Anas platyrhynchos domesticus	Domestic duck	Healthy	Active surveillance	Undefined	Adult	Free-range domestic	waterfowl	2	400	Illitarate	real-time RT-PCR	Negative	cELISA	Positive
11	11	Blood, Oropharyngeal swab and cloacal swabs	2015	Hakaluki wetland	Bhatera	Sylhet	Bangladesh	Chattogram Veterinary and Animal Sciences University	Anas platyrhynchos domesticus	Domestic duck	Healthy	Active surveillance	Undefined	Adult	Free-range domestic	waterfowl	3	550	Literate	real-time RT-PCR	Negative	cELISA	Negative
12	12	Blood, Oropharyngeal swab and cloacal swabs	2015	Hakaluki wetland	Bhatera	Sylhet	Bangladesh	Chattogram Veterinary and Animal Sciences University	Anas platyrhynchos domesticus	Domestic duck	Healthy	Active surveillance	Undefined	Adult	Free-range domestic	waterfowl	3	550	Literate	real-time RT-PCR	Negative	cELISA	Positive
13	13	Blood, Oropharyngeal swab and cloacal swabs	2015	Hakaluki wetland	Bhatera	Sylhet	Bangladesh	Chattogram Veterinary and Animal Sciences University	Anas platyrhynchos domesticus	Domestic duck	Healthy	Active surveillance	Undefined	Adult	Free-range domestic	waterfowl	3	550	Literate	real-time RT-PCR	Negative	cELISA	Positive
14	14	Blood, Oropharyngeal swab and cloacal swabs	2015	Hakaluki wetland	Bhatera	Sylhet	Bangladesh	Chattogram Veterinary and Animal Sciences University	Anas platyrhynchos domesticus	Domestic duck	Healthy	Active surveillance	Undefined	Adult	Free-range domestic	waterfowl	3	550	Literate	real-time RT-PCR	Negative	cELISA	Negative
15	15	Blood, Oropharyngeal swab and cloacal swabs	2015	Hakaluki wetland	Bhatera	Sylhet	Bangladesh	Chattogram Veterinary and Animal Sciences University	Anas platyrhynchos domesticus	Domestic duck	Healthy	Active surveillance	Undefined	Adult	Free-range domestic	waterfowl	3	550	Literate	real-time RT-PCR	Negative	cELISA	Negative
16	16	Blood, Oropharyngeal swab and cloacal swabs	2015	Hakaluki wetland	Bhatera	Sylhet	Bangladesh	Chattogram Veterinary and Animal Sciences University	Anas platyrhynchos domesticus	Domestic duck	Healthy	Active surveillance	Undefined	Adult	Free-range domestic	waterfowl	4	390	Literate	real-time RT-PCR	Negative	cELISA	Negative
17	17	Blood, Oropharyngeal swab and cloacal swabs	2015	Hakaluki wetland	Bhatera	Sylhet	Bangladesh	Chattogram Veterinary and Animal Sciences University	Anas platyrhynchos domesticus	Domestic duck	Healthy	Active surveillance	Undefined	Adult	Free-range domestic	waterfowl	4	390	Literate	real-time RT-PCR	Negative	cELISA	Negative
18	18	Blood, Oropharyngeal swab and cloacal swabs	2015	Hakaluki wetland	Bhatera	Sylhet	Bangladesh	Chattogram Veterinary and Animal Sciences University	Anas platyrhynchos domesticus	Domestic duck	Healthy	Active surveillance	Undefined	Adult	Free-range domestic	waterfowl	4	390	Literate	real-time RT-PCR	Negative	cELISA	Positive
19	19	Blood, Oropharyngeal swab and cloacal swabs	2015	Hakaluki wetland	Bhatera	Sylhet	Bangladesh	Chattogram Veterinary and Animal Sciences University	Anas platyrhynchos domesticus	Domestic duck	Healthy	Active surveillance	Undefined	Adult	Free-range domestic	waterfowl	4	390	Literate	real-time RT-PCR	Negative	cELISA	Negative
20	20	Blood, Oropharyngeal swab and cloacal swabs	2015	Hakaluki wetland	Bhatera	Sylhet	Bangladesh	Chattogram Veterinary and Animal Sciences University	Anas platyrhynchos domesticus	Domestic duck	Healthy	Active surveillance	Undefined	Adult	Free-range domestic	waterfowl	4	390	Literate	real-time RT-PCR	Negative	cELISA	Negative
21	21	Blood, Oropharyngeal swab and cloacal swabs	2015	Hakaluki wetland	Bhatera	Sylhet	Bangladesh	Chattogram Veterinary and Animal Sciences University	Anas platyrhynchos domesticus	Domestic duck	Healthy	Active surveillance	Undefined	Adult	Free-range domestic	waterfowl	5	300	Illitarate	real-time RT-PCR	Negative	cELISA	Positive
22	22	Blood, Oropharyngeal swab and cloacal swabs	2015	Hakaluki wetland	Bhatera	Sylhet	Bangladesh	Chattogram Veterinary and Animal Sciences University	Anas platyrhynchos domesticus	Domestic duck	Healthy	Active surveillance	Undefined	Adult	Free-range domestic	waterfowl	5	300	Illitarate	real-time RT-PCR	Negative	cELISA	Positive
23	23	Blood, Oropharyngeal swab and cloacal swabs	2015	Hakaluki wetland	Bhatera	Sylhet	Bangladesh	Chattogram Veterinary and Animal Sciences University	Anas platyrhynchos domesticus	Domestic duck	Healthy	Active surveillance	Undefined	Adult	Free-range domestic	waterfowl	5	300	Illitarate	real-time RT-PCR	Negative	cELISA	Negative
24	24	Blood, Oropharyngeal swab and cloacal swabs	2015	Hakaluki wetland	Bhatera	Sylhet	Bangladesh	Chattogram Veterinary and Animal Sciences University	Anas platyrhynchos domesticus	Domestic duck	Healthy	Active surveillance	Undefined	Adult	Household	without chicken	1	5	Literate	real-time RT-PCR	Negative	cELISA	Positive
25	25	Blood, Oropharyngeal swab and cloacal swabs	2015	Hakaluki wetland	Bhatera	Sylhet	Bangladesh	Chattogram Veterinary and Animal Sciences University	Anas platyrhynchos domesticus	Domestic duck	Healthy	Active surveillance	Undefined	Adult	Household	without chicken	2	6	Literate	real-time RT-PCR	Negative	cELISA	Negative
26	26	Blood, Oropharyngeal swab and cloacal swabs	2015	Hakaluki wetland	Bhatera	Sylhet	Bangladesh	Chattogram Veterinary and Animal Sciences University	Anas platyrhynchos domesticus	Domestic duck	Healthy	Active surveillance	Undefined	Adult	Household	without chicken	3	8	Illitarate	real-time RT-PCR	Negative	cELISA	Negative
27	27	Blood, Oropharyngeal swab and cloacal swabs	2015	Hakaluki wetland	Bhatera	Sylhet	Bangladesh	Chattogram Veterinary and Animal Sciences University	Anas platyrhynchos domesticus	Domestic duck	Healthy	Active surveillance	Undefined	Adult	Household	without chicken	4	10	Illitarate	real-time RT-PCR	Negative	cELISA	Negative
28	28	Blood, Oropharyngeal swab and cloacal swabs	2015	Hakaluki wetland	Bhatera	Sylhet	Bangladesh	Chattogram Veterinary and Animal Sciences University	Anas platyrhynchos domesticus	Domestic duck	Healthy	Active surveillance	Undefined	Adult	Household	without chicken	5	11	Illitarate	real-time RT-PCR	Negative	cELISA	Positive
29	29	Blood, Oropharyngeal swab and cloacal swabs	2015	Hakaluki wetland	Bhatera	Sylhet	Bangladesh	Chattogram Veterinary and Animal Sciences University	Anas platyrhynchos domesticus	Domestic duck	Healthy	Active surveillance	Undefined	Adult	Household	without chicken	6	6	Illitarate	real-time RT-PCR	Negative	cELISA	Positive
30	30	Blood, Oropharyngeal swab and cloacal swabs	2015	Hakaluki wetland	Bhatera	Sylhet	Bangladesh	Chattogram Veterinary and Animal Sciences University	Anas platyrhynchos domesticus	Domestic duck	Healthy	Active surveillance	Undefined	Adult	Household	without chicken	7	9	Literate	real-time RT-PCR	Negative	cELISA	Negative
31	31	Blood, Oropharyngeal swab and cloacal swabs	2015	Hakaluki wetland	Bhatera	Sylhet	Bangladesh	Chattogram Veterinary and Animal Sciences University	Anas platyrhynchos domesticus	Domestic duck	Healthy	Active surveillance	Undefined	Adult	Household	without chicken	8	6	Literate	real-time RT-PCR	Negative	cELISA	Negative
32	32	Blood, Oropharyngeal swab and cloacal swabs	2015	Hakaluki wetland	Bhatera	Sylhet	Bangladesh	Chattogram Veterinary and Animal Sciences University	Anas platyrhynchos domesticus	Domestic duck	Healthy	Active surveillance	Undefined	Adult	Household	with chicken	9	7	Literate	real-time RT-PCR	Negative	cELISA	Positive
33	33	Blood, Oropharyngeal swab and cloacal swabs	2015	Hakaluki wetland	Bhatera	Sylhet	Bangladesh	Chattogram Veterinary and Animal Sciences University	Anas platyrhynchos domesticus	Domestic duck	Healthy	Active surveillance	Undefined	Adult	Household	with chicken	10	5	Literate	real-time RT-PCR	Negative	cELISA	Positive
34	34	Blood, Oropharyngeal swab and cloacal swabs	2015	Hakaluki wetland	Bhatera	Sylhet	Bangladesh	Chattogram Veterinary and Animal Sciences University	Anas platyrhynchos domesticus	Domestic duck	Healthy	Active surveillance	Undefined	Adult	Household	with chicken	11	6	Literate	real-time RT-PCR	Negative	cELISA	Positive
35	35	Blood, Oropharyngeal swab and cloacal swabs	2015	Hakaluki wetland	Bhatera	Sylhet	Bangladesh	Chattogram Veterinary and Animal Sciences University	Anas platyrhynchos domesticus	Domestic duck	Healthy	Active surveillance	Undefined	Adult	Household	with chicken	12	7	Literate	real-time RT-PCR	Negative	cELISA	Positive
36	36	Blood, Oropharyngeal swab and cloacal swabs	2015	Hakaluki wetland	Bhatera	Sylhet	Bangladesh	Chattogram Veterinary and Animal Sciences University	Anas platyrhynchos domesticus	Domestic duck	Healthy	Active surveillance	Undefined	Adult	Household	with chicken	13	8	Literate	real-time RT-PCR	Negative	cELISA	Positive
37	37	Blood, Oropharyngeal swab and cloacal swabs	2015	Hakaluki wetland	Bhatera	Sylhet	Bangladesh	Chattogram Veterinary and Animal Sciences University	Anas platyrhynchos domesticus	Domestic duck	Healthy	Active surveillance	Undefined	Adult	Household	with chicken	14	8	Literate	real-time RT-PCR	Negative	cELISA	Negative
38	38	Blood, Oropharyngeal swab and cloacal swabs	2015	Hakaluki wetland	Bhatera	Sylhet	Bangladesh	Chattogram Veterinary and Animal Sciences University	Anas platyrhynchos domesticus	Domestic duck	Healthy	Active surveillance	Undefined	Adult	Household	without chicken	15	12	Literate	real-time RT-PCR	Negative	cELISA	Negative
39	39	Blood, Oropharyngeal swab and cloacal swabs	2015	Hakaluki wetland	Bhatera	Sylhet	Bangladesh	Chattogram Veterinary and Animal Sciences University	Anas platyrhynchos domesticus	Domestic duck	Healthy	Active surveillance	Undefined	Adult	Household	without chicken	16	9	Literate	real-time RT-PCR	Negative	cELISA	Negative
40	40	Blood, Oropharyngeal swab and cloacal swabs	2015	Hakaluki wetland	Bhatera	Sylhet	Bangladesh	Chattogram Veterinary and Animal Sciences University	Anas platyrhynchos domesticus	Domestic duck	Healthy	Active surveillance	Undefined	Adult	Household	with chicken	17	5	Illitarate	real-time RT-PCR	Negative	cELISA	Positive
41	41	Blood, Oropharyngeal swab and cloacal swabs	2015	Hakaluki wetland	Bhatera	Sylhet	Bangladesh	Chattogram Veterinary and Animal Sciences University	Anas platyrhynchos domesticus	Domestic duck	Healthy	Active surveillance	Undefined	Adult	Household	without chicken	18	7	Literate	real-time RT-PCR	Negative	cELISA	Negative
42	42	Blood, Oropharyngeal swab and cloacal swabs	2015	Hakaluki wetland	Bhatera	Sylhet	Bangladesh	Chattogram Veterinary and Animal Sciences University	Anas platyrhynchos domesticus	Domestic duck	Healthy	Active surveillance	Undefined	Adult	Household	without chicken	19	9	Literate	real-time RT-PCR	Negative	cELISA	Negative
43	43	Blood, Oropharyngeal swab and cloacal swabs	2015	Hakaluki wetland	Bhatera	Sylhet	Bangladesh	Chattogram Veterinary and Animal Sciences University	Anas platyrhynchos domesticus	Domestic duck	Healthy	Active surveillance	Undefined	Adult	Household	without chicken	20	5	Illitarate	real-time RT-PCR	Negative	cELISA	Negative
44	44	Blood, Oropharyngeal swab and cloacal swabs	2015	Hakaluki wetland	Bhatera	Sylhet	Bangladesh	Chattogram Veterinary and Animal Sciences University	Anas platyrhynchos domesticus	Domestic duck	Healthy	Active surveillance	Undefined	Adult	Household	without chicken	21	8	Illitarate	real-time RT-PCR	Negative	cELISA	Negative
45	45	Blood, Oropharyngeal swab and cloacal swabs	2015	Hakaluki wetland	Bhatera	Sylhet	Bangladesh	Chattogram Veterinary and Animal Sciences University	Anas platyrhynchos domesticus	Domestic duck	Healthy	Active surveillance	Undefined	Adult	Household	without chicken	22	6	Illitarate	real-time RT-PCR	Negative	cELISA	Negative
46	46	Blood, Oropharyngeal swab and cloacal swabs	2015	Hakaluki wetland	Bhatera	Sylhet	Bangladesh	Chattogram Veterinary and Animal Sciences University	Anas platyrhynchos domesticus	Domestic duck	Healthy	Active surveillance	Undefined	Adult	Household	without chicken	23	9	Illitarate	real-time RT-PCR	Negative	cELISA	Positive
47	47	Blood, Oropharyngeal swab and cloacal swabs	2015	Hakaluki wetland	Bhatera	Sylhet	Bangladesh	Chattogram Veterinary and Animal Sciences University	Anas platyrhynchos domesticus	Domestic duck	Healthy	Active surveillance	Undefined	Adult	Household	without chicken	24	10	Illitarate	real-time RT-PCR	Negative	cELISA	Negative
48	48	Blood, Oropharyngeal swab and cloacal swabs	2015	Hakaluki wetland	Bhatera	Sylhet	Bangladesh	Chattogram Veterinary and Animal Sciences University	Anas platyrhynchos domesticus	Domestic duck	Healthy	Active surveillance	Undefined	Adult	Household	without chicken	25	7	Illitarate	real-time RT-PCR	Negative	cELISA	Negative
49	49	Blood, Oropharyngeal swab and cloacal swabs	2015	Hakaluki wetland	Bhatera	Sylhet	Bangladesh	Chattogram Veterinary and Animal Sciences University	Anas platyrhynchos domesticus	Domestic duck	Healthy	Active surveillance	Undefined	Adult	Household	without chicken	26	9	Illitarate	real-time RT-PCR	Negative	cELISA	Positive
50	50	Blood, Oropharyngeal swab and cloacal swabs	2015	Hakaluki wetland	Bhatera	Sylhet	Bangladesh	Chattogram Veterinary and Animal Sciences University	Anas platyrhynchos domesticus	Domestic duck	Healthy	Active surveillance	Undefined	Adult	Household	without chicken	27	5	Illitarate	real-time RT-PCR	Negative	cELISA	Negative
51	51	Blood, Oropharyngeal swab and cloacal swabs	2015	Hakaluki wetland	Bhatera	Sylhet	Bangladesh	Chattogram Veterinary and Animal Sciences University	Anas platyrhynchos domesticus	Domestic duck	Healthy	Active surveillance	Undefined	Adult	Household	with chicken	28	7	Literate	real-time RT-PCR	Negative	cELISA	Negative
52	52	Blood, Oropharyngeal swab and cloacal swabs	2015	Hakaluki wetland	Bhatera	Sylhet	Bangladesh	Chattogram Veterinary and Animal Sciences University	Anas platyrhynchos domesticus	Domestic duck	Healthy	Active surveillance	Undefined	Adult	Household	with chicken	29	9	Literate	real-time RT-PCR	Negative	cELISA	Negative
53	53	Blood, Oropharyngeal swab and cloacal swabs	2015	Hakaluki wetland	Bhatera	Sylhet	Bangladesh	Chattogram Veterinary and Animal Sciences University	Anas platyrhynchos domesticus	Domestic duck	Healthy	Active surveillance	Undefined	Adult	Household	with chicken	30	6	Literate	real-time RT-PCR	Negative	cELISA	Negative
54	54	Blood, Oropharyngeal swab and cloacal swabs	2015	Hakaluki wetland	Barlekha	Sylhet	Bangladesh	Chattogram Veterinary and Animal Sciences University	Anas platyrhynchos domesticus	Domestic duck	Healthy	Active surveillance	Undefined	Adult	Household	with chicken	31	8	Literate	real-time RT-PCR	Negative	cELISA	Positive
55	55	Blood, Oropharyngeal swab and cloacal swabs	2015	Hakaluki wetland	Barlekha	Sylhet	Bangladesh	Chattogram Veterinary and Animal Sciences University	Anas platyrhynchos domesticus	Domestic duck	Healthy	Active surveillance	Undefined	Adult	Household	with chicken	32	10	Literate	real-time RT-PCR	Negative	cELISA	Positive
56	56	Blood, Oropharyngeal swab and cloacal swabs	2015	Hakaluki wetland	Barlekha	Sylhet	Bangladesh	Chattogram Veterinary and Animal Sciences University	Anas platyrhynchos domesticus	Domestic duck	Healthy	Active surveillance	Undefined	Adult	Household	with chicken	33	11	Illitarate	real-time RT-PCR	Negative	cELISA	Negative
57	57	Blood, Oropharyngeal swab and cloacal swabs	2015	Hakaluki wetland	Barlekha	Sylhet	Bangladesh	Chattogram Veterinary and Animal Sciences University	Anas platyrhynchos domesticus	Domestic duck	Healthy	Active surveillance	Undefined	Adult	Household	with chicken	34	7	Illitarate	real-time RT-PCR	Negative	cELISA	Positive
58	58	Blood, Oropharyngeal swab and cloacal swabs	2015	Hakaluki wetland	Barlekha	Sylhet	Bangladesh	Chattogram Veterinary and Animal Sciences University	Anas platyrhynchos domesticus	Domestic duck	Healthy	Active surveillance	Undefined	Adult	Household	with chicken	35	5	Illitarate	real-time RT-PCR	Negative	cELISA	Negative
59	59	Blood, Oropharyngeal swab and cloacal swabs	2015	Hakaluki wetland	Barlekha	Sylhet	Bangladesh	Chattogram Veterinary and Animal Sciences University	Anas platyrhynchos domesticus	Domestic duck	Healthy	Active surveillance	Undefined	Adult	Household	without chicken	36	8	Literate	real-time RT-PCR	Negative	cELISA	Positive
60	60	Blood, Oropharyngeal swab and cloacal swabs	2015	Hakaluki wetland	Barlekha	Sylhet	Bangladesh	Chattogram Veterinary and Animal Sciences University	Anas platyrhynchos domesticus	Domestic duck	Healthy	Active surveillance	Undefined	Adult	Household	without chicken	37	6	Illitarate	real-time RT-PCR	Negative	cELISA	Positive
61	61	Blood, Oropharyngeal swab and cloacal swabs	2015	Hakaluki wetland	Barlekha	Sylhet	Bangladesh	Chattogram Veterinary and Animal Sciences University	Anas platyrhynchos domesticus	Domestic duck	Healthy	Active surveillance	Undefined	Adult	Household	without chicken	38	8	Literate	real-time RT-PCR	Negative	cELISA	Negative
62	62	Blood, Oropharyngeal swab and cloacal swabs	2015	Hakaluki wetland	Barlekha	Sylhet	Bangladesh	Chattogram Veterinary and Animal Sciences University	Anas platyrhynchos domesticus	Domestic duck	Healthy	Active surveillance	Undefined	Adult	Household	without chicken	39	5	Literate	real-time RT-PCR	Negative	cELISA	Positive
63	63	Blood, Oropharyngeal swab and cloacal swabs	2015	Hakaluki wetland	Barlekha	Sylhet	Bangladesh	Chattogram Veterinary and Animal Sciences University	Anas platyrhynchos domesticus	Domestic duck	Healthy	Active surveillance	Undefined	Adult	Household	without chicken	40	7	Illitarate	real-time RT-PCR	Negative	cELISA	Negative
64	64	Blood, Oropharyngeal swab and cloacal swabs	2015	Hakaluki wetland	Barlekha	Sylhet	Bangladesh	Chattogram Veterinary and Animal Sciences University	Anas platyrhynchos domesticus	Domestic duck	Healthy	Active surveillance	Undefined	Adult	Household	without chicken	41	6	Illitarate	real-time RT-PCR	Negative	cELISA	Negative
65	65	Blood, Oropharyngeal swab and cloacal swabs	2015	Hakaluki wetland	Barlekha	Sylhet	Bangladesh	Chattogram Veterinary and Animal Sciences University	Anas platyrhynchos domesticus	Domestic duck	Healthy	Active surveillance	Undefined	Adult	Household	without chicken	42	9	Illitarate	real-time RT-PCR	Negative	cELISA	Positive
66	66	Blood, Oropharyngeal swab and cloacal swabs	2015	Hakaluki wetland	Barlekha	Sylhet	Bangladesh	Chattogram Veterinary and Animal Sciences University	Anas platyrhynchos domesticus	Domestic duck	Healthy	Active surveillance	Undefined	Adult	Household	without chicken	43	5	Illitarate	real-time RT-PCR	Negative	cELISA	Positive
67	67	Blood, Oropharyngeal swab and cloacal swabs	2015	Hakaluki wetland	Barlekha	Sylhet	Bangladesh	Chattogram Veterinary and Animal Sciences University	Anas platyrhynchos domesticus	Domestic duck	Healthy	Active surveillance	Undefined	Adult	Household	without chicken	44	7	Illitarate	real-time RT-PCR	Negative	cELISA	Positive
68	68	Blood, Oropharyngeal swab and cloacal swabs	2015	Hakaluki wetland	Barlekha	Sylhet	Bangladesh	Chattogram Veterinary and Animal Sciences University	Anas platyrhynchos domesticus	Domestic duck	Healthy	Active surveillance	Undefined	Adult	Household	without chicken	45	5	Illitarate	real-time RT-PCR	Negative	cELISA	Negative
69	69	Blood, Oropharyngeal swab and cloacal swabs	2015	Hakaluki wetland	Barlekha	Sylhet	Bangladesh	Chattogram Veterinary and Animal Sciences University	Anas platyrhynchos domesticus	Domestic duck	Healthy	Active surveillance	Undefined	Adult	Household	without chicken	46	7	Illitarate	real-time RT-PCR	Negative	cELISA	Positive
70	70	Blood, Oropharyngeal swab and cloacal swabs	2015	Hakaluki wetland	Barlekha	Sylhet	Bangladesh	Chattogram Veterinary and Animal Sciences University	Anas platyrhynchos domesticus	Domestic duck	Healthy	Active surveillance	Undefined	Adult	Household	without chicken	47	7	Illitarate	real-time RT-PCR	Negative	cELISA	Positive
71	71	Blood, Oropharyngeal swab and cloacal swabs	2015	Hakaluki wetland	Barlekha	Sylhet	Bangladesh	Chattogram Veterinary and Animal Sciences University	Anas platyrhynchos domesticus	Domestic duck	Healthy	Active surveillance	Undefined	Adult	Household	without chicken	48	6	Illitarate	real-time RT-PCR	Negative	cELISA	Positive
72	72	Blood, Oropharyngeal swab and cloacal swabs	2015	Hakaluki wetland	Barlekha	Sylhet	Bangladesh	Chattogram Veterinary and Animal Sciences University	Anas platyrhynchos domesticus	Domestic duck	Healthy	Active surveillance	Undefined	Adult	Household	without chicken	49	6	Illitarate	real-time RT-PCR	Negative	cELISA	Positive
73	73	Blood, Oropharyngeal swab and cloacal swabs	2015	Hakaluki wetland	Bhatera	Sylhet	Bangladesh	Chattogram Veterinary and Animal Sciences University	Anas platyrhynchos domesticus	Domestic duck	Healthy	Active surveillance	Undefined	Adult	Free-range domestic	waterfowl	5	300	Illitarate	real-time RT-PCR	Negative	cELISA	Positive
74	74	Blood, Oropharyngeal swab and cloacal swabs	2015	Hakaluki wetland	Bhatera	Sylhet	Bangladesh	Chattogram Veterinary and Animal Sciences University	Anas platyrhynchos domesticus	Domestic duck	Healthy	Active surveillance	Undefined	Adult	Free-range domestic	waterfowl	5	300	Illitarate	real-time RT-PCR	Negative	cELISA	Positive
75	75	Blood, Oropharyngeal swab and cloacal swabs	2015	Hakaluki wetland	Barlekha	Sylhet	Bangladesh	Chattogram Veterinary and Animal Sciences University	Anas platyrhynchos domesticus	Domestic duck	Healthy	Active surveillance	Undefined	Adult	Free-range domestic	waterfowl	6	460	Literate	real-time RT-PCR	Negative	cELISA	Negative
76	76	Blood, Oropharyngeal swab and cloacal swabs	2015	Hakaluki wetland	Barlekha	Sylhet	Bangladesh	Chattogram Veterinary and Animal Sciences University	Anas platyrhynchos domesticus	Domestic duck	Healthy	Active surveillance	Undefined	Adult	Free-range domestic	waterfowl	6	460	Literate	real-time RT-PCR	Negative	cELISA	Positive
77	77	Blood, Oropharyngeal swab and cloacal swabs	2015	Hakaluki wetland	Barlekha	Sylhet	Bangladesh	Chattogram Veterinary and Animal Sciences University	Anas platyrhynchos domesticus	Domestic duck	Healthy	Active surveillance	Undefined	Adult	Free-range domestic	waterfowl	6	460	Literate	real-time RT-PCR	Negative	cELISA	Positive
78	78	Blood, Oropharyngeal swab and cloacal swabs	2015	Hakaluki wetland	Barlekha	Sylhet	Bangladesh	Chattogram Veterinary and Animal Sciences University	Anas platyrhynchos domesticus	Domestic duck	Healthy	Active surveillance	Undefined	Adult	Free-range domestic	waterfowl	6	460	Literate	real-time RT-PCR	Negative	cELISA	Positive
79	79	Blood, Oropharyngeal swab and cloacal swabs	2015	Hakaluki wetland	Barlekha	Sylhet	Bangladesh	Chattogram Veterinary and Animal Sciences University	Anas platyrhynchos domesticus	Domestic duck	Healthy	Active surveillance	Undefined	Adult	Free-range domestic	waterfowl	6	460	Literate	real-time RT-PCR	Negative	cELISA	Positive
80	80	Blood, Oropharyngeal swab and cloacal swabs	2015	Hakaluki wetland	Barlekha	Sylhet	Bangladesh	Chattogram Veterinary and Animal Sciences University	Anas platyrhynchos domesticus	Domestic duck	Healthy	Active surveillance	Undefined	Adult	Free-range domestic	waterfowl	7	340	Literate	real-time RT-PCR	Negative	cELISA	Positive
81	81	Blood, Oropharyngeal swab and cloacal swabs	2015	Hakaluki wetland	Barlekha	Sylhet	Bangladesh	Chattogram Veterinary and Animal Sciences University	Anas platyrhynchos domesticus	Domestic duck	Healthy	Active surveillance	Undefined	Adult	Free-range domestic	waterfowl	7	340	Literate	real-time RT-PCR	Negative	cELISA	Positive
82	82	Blood, Oropharyngeal swab and cloacal swabs	2015	Hakaluki wetland	Barlekha	Sylhet	Bangladesh	Chattogram Veterinary and Animal Sciences University	Anas platyrhynchos domesticus	Domestic duck	Healthy	Active surveillance	Undefined	Adult	Free-range domestic	waterfowl	7	340	Literate	real-time RT-PCR	Negative	cELISA	Positive
83	83	Blood, Oropharyngeal swab and cloacal swabs	2015	Hakaluki wetland	Barlekha	Sylhet	Bangladesh	Chattogram Veterinary and Animal Sciences University	Anas platyrhynchos domesticus	Domestic duck	Healthy	Active surveillance	Undefined	Adult	Free-range domestic	waterfowl	7	340	Literate	real-time RT-PCR	Negative	cELISA	Positive
84	84	Blood, Oropharyngeal swab and cloacal swabs	2015	Hakaluki wetland	Barlekha	Sylhet	Bangladesh	Chattogram Veterinary and Animal Sciences University	Anas platyrhynchos domesticus	Domestic duck	Healthy	Active surveillance	Undefined	Adult	Free-range domestic	waterfowl	7	340	Literate	real-time RT-PCR	Negative	cELISA	Negative
85	85	Blood, Oropharyngeal swab and cloacal swabs	2015	Hakaluki wetland	Barlekha	Sylhet	Bangladesh	Chattogram Veterinary and Animal Sciences University	Anas platyrhynchos domesticus	Domestic duck	Healthy	Active surveillance	Undefined	Adult	Free-range domestic	waterfowl	8	920	Literate	real-time RT-PCR	Negative	cELISA	Negative
86	86	Blood, Oropharyngeal swab and cloacal swabs	2015	Hakaluki wetland	Barlekha	Sylhet	Bangladesh	Chattogram Veterinary and Animal Sciences University	Anas platyrhynchos domesticus	Domestic duck	Healthy	Active surveillance	Undefined	Adult	Free-range domestic	waterfowl	8	920	Literate	real-time RT-PCR	Negative	cELISA	Positive
87	87	Blood, Oropharyngeal swab and cloacal swabs	2015	Hakaluki wetland	Barlekha	Sylhet	Bangladesh	Chattogram Veterinary and Animal Sciences University	Anas platyrhynchos domesticus	Domestic duck	Healthy	Active surveillance	Undefined	Adult	Free-range domestic	waterfowl	8	920	Literate	real-time RT-PCR	Negative	cELISA	Positive
88	88	Blood, Oropharyngeal swab and cloacal swabs	2015	Hakaluki wetland	Barlekha	Sylhet	Bangladesh	Chattogram Veterinary and Animal Sciences University	Anas platyrhynchos domesticus	Domestic duck	Healthy	Active surveillance	Undefined	Adult	Free-range domestic	waterfowl	8	920	Literate	real-time RT-PCR	Negative	cELISA	Positive
89	89	Blood, Oropharyngeal swab and cloacal swabs	2015	Hakaluki wetland	Barlekha	Sylhet	Bangladesh	Chattogram Veterinary and Animal Sciences University	Anas platyrhynchos domesticus	Domestic duck	Healthy	Active surveillance	Undefined	Adult	Free-range domestic	waterfowl	8	920	Literate	real-time RT-PCR	Negative	cELISA	Positive
90	90	Blood, Oropharyngeal swab and cloacal swabs	2015	Hakaluki wetland	Barlekha	Sylhet	Bangladesh	Chattogram Veterinary and Animal Sciences University	Anas platyrhynchos domesticus	Domestic duck	Healthy	Active surveillance	Undefined	Adult	Free-range domestic	waterfowl	9	490	Literate	real-time RT-PCR	Negative	cELISA	Positive
91	91	Blood, Oropharyngeal swab and cloacal swabs	2015	Hakaluki wetland	Barlekha	Sylhet	Bangladesh	Chattogram Veterinary and Animal Sciences University	Anas platyrhynchos domesticus	Domestic duck	Healthy	Active surveillance	Undefined	Adult	Free-range domestic	waterfowl	9	490	Literate	real-time RT-PCR	Negative	cELISA	Negative
92	92	Blood, Oropharyngeal swab and cloacal swabs	2015	Hakaluki wetland	Barlekha	Sylhet	Bangladesh	Chattogram Veterinary and Animal Sciences University	Anas platyrhynchos domesticus	Domestic duck	Healthy	Active surveillance	Undefined	Adult	Free-range domestic	waterfowl	9	490	Literate	real-time RT-PCR	Negative	cELISA	Positive
93	93	Blood, Oropharyngeal swab and cloacal swabs	2015	Hakaluki wetland	Barlekha	Sylhet	Bangladesh	Chattogram Veterinary and Animal Sciences University	Anas platyrhynchos domesticus	Domestic duck	Healthy	Active surveillance	Undefined	Adult	Free-range domestic	waterfowl	9	490	Literate	real-time RT-PCR	Negative	cELISA	Negative
94	94	Blood, Oropharyngeal swab and cloacal swabs	2015	Hakaluki wetland	Barlekha	Sylhet	Bangladesh	Chattogram Veterinary and Animal Sciences University	Anas platyrhynchos domesticus	Domestic duck	Healthy	Active surveillance	Undefined	Adult	Free-range domestic	waterfowl	9	490	Literate	real-time RT-PCR	Negative	cELISA	Negative
95	95	Blood, Oropharyngeal swab and cloacal swabs	2015	Hakaluki wetland	Shekpur	Sylhet	Bangladesh	Chattogram Veterinary and Animal Sciences University	Anas platyrhynchos domesticus	Domestic duck	Healthy	Active surveillance	Undefined	Adult	Free-range domestic	waterfowl	10	356	Illitarate	real-time RT-PCR	Negative	cELISA	Negative
96	96	Blood, Oropharyngeal swab and cloacal swabs	2015	Hakaluki wetland	Shekpur	Sylhet	Bangladesh	Chattogram Veterinary and Animal Sciences University	Anas platyrhynchos domesticus	Domestic duck	Healthy	Active surveillance	Undefined	Adult	Free-range domestic	waterfowl	10	356	Illitarate	real-time RT-PCR	Negative	cELISA	Negative
97	97	Blood, Oropharyngeal swab and cloacal swabs	2015	Hakaluki wetland	Shekpur	Sylhet	Bangladesh	Chattogram Veterinary and Animal Sciences University	Anas platyrhynchos domesticus	Domestic duck	Healthy	Active surveillance	Undefined	Adult	Free-range domestic	waterfowl	10	356	Illitarate	real-time RT-PCR	Negative	cELISA	Negative
98	98	Blood, Oropharyngeal swab and cloacal swabs	2015	Hakaluki wetland	Shekpur	Sylhet	Bangladesh	Chattogram Veterinary and Animal Sciences University	Anas platyrhynchos domesticus	Domestic duck	Healthy	Active surveillance	Undefined	Adult	Free-range domestic	waterfowl	10	356	Illitarate	real-time RT-PCR	Negative	cELISA	Negative
99	99	Blood, Oropharyngeal swab and cloacal swabs	2015	Hakaluki wetland	Shekpur	Sylhet	Bangladesh	Chattogram Veterinary and Animal Sciences University	Anas platyrhynchos domesticus	Domestic duck	Healthy	Active surveillance	Undefined	Adult	Free-range domestic	waterfowl	10	356	Illitarate	real-time RT-PCR	Negative	cELISA	Negative
100	100	Blood, Oropharyngeal swab and cloacal swabs	2015	Hakaluki wetland	Shekpur	Sylhet	Bangladesh	Chattogram Veterinary and Animal Sciences University	Anas platyrhynchos domesticus	Domestic duck	Healthy	Active surveillance	Undefined	Adult	Free-range domestic	waterfowl	11	390	Illitarate	real-time RT-PCR	Negative	cELISA	Negative
101	101	Blood, Oropharyngeal swab and cloacal swabs	2015	Hakaluki wetland	Shekpur	Sylhet	Bangladesh	Chattogram Veterinary and Animal Sciences University	Anas platyrhynchos domesticus	Domestic duck	Healthy	Active surveillance	Undefined	Adult	Free-range domestic	waterfowl	11	390	Illitarate	real-time RT-PCR	Positive	cELISA	Positive
102	102	Blood, Oropharyngeal swab and cloacal swabs	2015	Hakaluki wetland	Shekpur	Sylhet	Bangladesh	Chattogram Veterinary and Animal Sciences University	Anas platyrhynchos domesticus	Domestic duck	Healthy	Active surveillance	Undefined	Adult	Free-range domestic	waterfowl	11	390	Illitarate	real-time RT-PCR	Positive	cELISA	Negative
103	103	Blood, Oropharyngeal swab and cloacal swabs	2015	Hakaluki wetland	Shekpur	Sylhet	Bangladesh	Chattogram Veterinary and Animal Sciences University	Anas platyrhynchos domesticus	Domestic duck	Healthy	Active surveillance	Undefined	Adult	Free-range domestic	waterfowl	11	390	Illitarate	real-time RT-PCR	Positive	cELISA	Negative
104	104	Blood, Oropharyngeal swab and cloacal swabs	2015	Hakaluki wetland	Shekpur	Sylhet	Bangladesh	Chattogram Veterinary and Animal Sciences University	Anas platyrhynchos domesticus	Domestic duck	Healthy	Active surveillance	Undefined	Adult	Free-range domestic	waterfowl	11	390	Illitarate	real-time RT-PCR	Negative	cELISA	Negative
105	105	Blood, Oropharyngeal swab and cloacal swabs	2015	Tanguar wetland	Mohanganj	Sylhet	Bangladesh	Chattogram Veterinary and Animal Sciences University	Anas platyrhynchos domesticus	Domestic duck	Healthy	Active surveillance	Undefined	Adult	Free-range domestic	waterfowl	12	410	Illitarate	real-time RT-PCR	Negative	cELISA	Positive
106	106	Blood, Oropharyngeal swab and cloacal swabs	2015	Tanguar wetland	Mohanganj	Sylhet	Bangladesh	Chattogram Veterinary and Animal Sciences University	Anas platyrhynchos domesticus	Domestic duck	Healthy	Active surveillance	Undefined	Adult	Free-range domestic	waterfowl	12	410	Illitarate	real-time RT-PCR	Negative	cELISA	Positive
107	107	Blood, Oropharyngeal swab and cloacal swabs	2015	Tanguar wetland	Mohanganj	Sylhet	Bangladesh	Chattogram Veterinary and Animal Sciences University	Anas platyrhynchos domesticus	Domestic duck	Healthy	Active surveillance	Undefined	Adult	Free-range domestic	waterfowl	12	410	Illitarate	real-time RT-PCR	Negative	cELISA	Positive
108	108	Blood, Oropharyngeal swab and cloacal swabs	2015	Tanguar wetland	Mohanganj	Sylhet	Bangladesh	Chattogram Veterinary and Animal Sciences University	Anas platyrhynchos domesticus	Domestic duck	Healthy	Active surveillance	Undefined	Adult	Free-range domestic	waterfowl	12	410	Illitarate	real-time RT-PCR	Negative	cELISA	Positive
109	109	Blood, Oropharyngeal swab and cloacal swabs	2015	Tanguar wetland	Mohanganj	Sylhet	Bangladesh	Chattogram Veterinary and Animal Sciences University	Anas platyrhynchos domesticus	Domestic duck	Healthy	Active surveillance	Undefined	Adult	Free-range domestic	waterfowl	12	410	Illitarate	real-time RT-PCR	Negative	cELISA	Positive
110	110	Blood, Oropharyngeal swab and cloacal swabs	2015	Tanguar wetland	Mohanganj	Sylhet	Bangladesh	Chattogram Veterinary and Animal Sciences University	Anas platyrhynchos domesticus	Domestic duck	Healthy	Active surveillance	Undefined	Adult	Free-range domestic	waterfowl	13	300	Literate	real-time RT-PCR	Negative	cELISA	Positive
111	111	Blood, Oropharyngeal swab and cloacal swabs	2015	Tanguar wetland	Mohanganj	Sylhet	Bangladesh	Chattogram Veterinary and Animal Sciences University	Anas platyrhynchos domesticus	Domestic duck	Healthy	Active surveillance	Undefined	Adult	Free-range domestic	waterfowl	13	300	Literate	real-time RT-PCR	Negative	cELISA	Positive
112	112	Blood, Oropharyngeal swab and cloacal swabs	2015	Tanguar wetland	Mohanganj	Sylhet	Bangladesh	Chattogram Veterinary and Animal Sciences University	Anas platyrhynchos domesticus	Domestic duck	Healthy	Active surveillance	Undefined	Adult	Free-range domestic	waterfowl	13	300	Literate	real-time RT-PCR	Negative	cELISA	Positive
113	113	Blood, Oropharyngeal swab and cloacal swabs	2015	Tanguar wetland	Mohanganj	Sylhet	Bangladesh	Chattogram Veterinary and Animal Sciences University	Anas platyrhynchos domesticus	Domestic duck	Healthy	Active surveillance	Undefined	Adult	Free-range domestic	waterfowl	13	300	Literate	real-time RT-PCR	Negative	cELISA	Positive
114	114	Blood, Oropharyngeal swab and cloacal swabs	2015	Tanguar wetland	Mohanganj	Sylhet	Bangladesh	Chattogram Veterinary and Animal Sciences University	Anas platyrhynchos domesticus	Domestic duck	Healthy	Active surveillance	Undefined	Adult	Free-range domestic	waterfowl	13	300	Literate	real-time RT-PCR	Negative	cELISA	Positive
115	115	Blood, Oropharyngeal swab and cloacal swabs	2015	Tanguar wetland	Barhatta	Sylhet	Bangladesh	Chattogram Veterinary and Animal Sciences University	Anas platyrhynchos domesticus	Domestic duck	Healthy	Active surveillance	Undefined	Adult	Free-range domestic	waterfowl	14	470	Literate	real-time RT-PCR	Negative	cELISA	Positive
116	116	Blood, Oropharyngeal swab and cloacal swabs	2015	Tanguar wetland	Barhatta	Sylhet	Bangladesh	Chattogram Veterinary and Animal Sciences University	Anas platyrhynchos domesticus	Domestic duck	Healthy	Active surveillance	Undefined	Adult	Free-range domestic	waterfowl	14	470	Literate	real-time RT-PCR	Negative	cELISA	Positive
117	117	Blood, Oropharyngeal swab and cloacal swabs	2015	Tanguar wetland	Barhatta	Sylhet	Bangladesh	Chattogram Veterinary and Animal Sciences University	Anas platyrhynchos domesticus	Domestic duck	Healthy	Active surveillance	Undefined	Adult	Free-range domestic	waterfowl	14	470	Literate	real-time RT-PCR	Negative	cELISA	Negative
118	118	Blood, Oropharyngeal swab and cloacal swabs	2015	Tanguar wetland	Barhatta	Sylhet	Bangladesh	Chattogram Veterinary and Animal Sciences University	Anas platyrhynchos domesticus	Domestic duck	Healthy	Active surveillance	Undefined	Adult	Free-range domestic	waterfowl	14	470	Literate	real-time RT-PCR	Negative	cELISA	Positive
119	119	Blood, Oropharyngeal swab and cloacal swabs	2015	Tanguar wetland	Barhatta	Sylhet	Bangladesh	Chattogram Veterinary and Animal Sciences University	Anas platyrhynchos domesticus	Domestic duck	Healthy	Active surveillance	Undefined	Adult	Free-range domestic	waterfowl	14	470	Literate	real-time RT-PCR	Negative	cELISA	Positive
120	120	Blood, Oropharyngeal swab and cloacal swabs	2015	Tanguar wetland	Barhatta	Sylhet	Bangladesh	Chattogram Veterinary and Animal Sciences University	Anas platyrhynchos domesticus	Domestic duck	Healthy	Active surveillance	Undefined	Adult	Free-range domestic	waterfowl	15	810	Literate	real-time RT-PCR	Negative	cELISA	Negative
121	121	Blood, Oropharyngeal swab and cloacal swabs	2015	Tanguar wetland	Barhatta	Sylhet	Bangladesh	Chattogram Veterinary and Animal Sciences University	Anas platyrhynchos domesticus	Domestic duck	Healthy	Active surveillance	Undefined	Adult	Free-range domestic	waterfowl	15	810	Literate	real-time RT-PCR	Negative	cELISA	Positive
122	122	Blood, Oropharyngeal swab and cloacal swabs	2015	Tanguar wetland	Barhatta	Sylhet	Bangladesh	Chattogram Veterinary and Animal Sciences University	Anas platyrhynchos domesticus	Domestic duck	Healthy	Active surveillance	Undefined	Adult	Free-range domestic	waterfowl	15	810	Literate	real-time RT-PCR	Negative	cELISA	Positive
123	123	Blood, Oropharyngeal swab and cloacal swabs	2015	Tanguar wetland	Barhatta	Sylhet	Bangladesh	Chattogram Veterinary and Animal Sciences University	Anas platyrhynchos domesticus	Domestic duck	Healthy	Active surveillance	Undefined	Adult	Free-range domestic	waterfowl	15	810	Literate	real-time RT-PCR	Negative	cELISA	Negative
124	124	Blood, Oropharyngeal swab and cloacal swabs	2015	Tanguar wetland	Barhatta	Sylhet	Bangladesh	Chattogram Veterinary and Animal Sciences University	Anas platyrhynchos domesticus	Domestic duck	Healthy	Active surveillance	Undefined	Adult	Free-range domestic	waterfowl	15	810	Literate	real-time RT-PCR	Negative	cELISA	Positive
125	125	Blood, Oropharyngeal swab and cloacal swabs	2015	Tanguar wetland	Kalmakanda	Sylhet	Bangladesh	Chattogram Veterinary and Animal Sciences University	Anas platyrhynchos domesticus	Domestic duck	Healthy	Active surveillance	Undefined	Adult	Free-range domestic	waterfowl	16	345	Literate	real-time RT-PCR	Negative	cELISA	Positive
126	126	Blood, Oropharyngeal swab and cloacal swabs	2015	Tanguar wetland	Kalmakanda	Sylhet	Bangladesh	Chattogram Veterinary and Animal Sciences University	Anas platyrhynchos domesticus	Domestic duck	Healthy	Active surveillance	Undefined	Adult	Free-range domestic	waterfowl	16	345	Literate	real-time RT-PCR	Negative	cELISA	Positive
127	127	Blood, Oropharyngeal swab and cloacal swabs	2015	Tanguar wetland	Kalmakanda	Sylhet	Bangladesh	Chattogram Veterinary and Animal Sciences University	Anas platyrhynchos domesticus	Domestic duck	Healthy	Active surveillance	Undefined	Adult	Free-range domestic	waterfowl	16	345	Literate	real-time RT-PCR	Negative	cELISA	Positive
128	128	Blood, Oropharyngeal swab and cloacal swabs	2015	Tanguar wetland	Kalmakanda	Sylhet	Bangladesh	Chattogram Veterinary and Animal Sciences University	Anas platyrhynchos domesticus	Domestic duck	Healthy	Active surveillance	Undefined	Adult	Free-range domestic	waterfowl	16	345	Literate	real-time RT-PCR	Negative	cELISA	Positive
129	129	Blood, Oropharyngeal swab and cloacal swabs	2015	Tanguar wetland	Kalmakanda	Sylhet	Bangladesh	Chattogram Veterinary and Animal Sciences University	Anas platyrhynchos domesticus	Domestic duck	Healthy	Active surveillance	Undefined	Adult	Free-range domestic	waterfowl	16	345	Literate	real-time RT-PCR	Negative	cELISA	Positive
130	130	Blood, Oropharyngeal swab and cloacal swabs	2015	Tanguar wetland	Kalmakanda	Sylhet	Bangladesh	Chattogram Veterinary and Animal Sciences University	Anas platyrhynchos domesticus	Domestic duck	Healthy	Active surveillance	Undefined	Adult	Household	with chicken	50	5	Illitarate	real-time RT-PCR	Negative	cELISA	Positive
131	131	Blood, Oropharyngeal swab and cloacal swabs	2015	Tanguar wetland	Kalmakanda	Sylhet	Bangladesh	Chattogram Veterinary and Animal Sciences University	Anas platyrhynchos domesticus	Domestic duck	Healthy	Active surveillance	Undefined	Adult	Household	with chicken	51	6	Illitarate	real-time RT-PCR	Negative	cELISA	Positive
132	132	Blood, Oropharyngeal swab and cloacal swabs	2015	Tanguar wetland	Kalmakanda	Sylhet	Bangladesh	Chattogram Veterinary and Animal Sciences University	Anas platyrhynchos domesticus	Domestic duck	Healthy	Active surveillance	Undefined	Adult	Household	with chicken	52	8	Illitarate	real-time RT-PCR	Negative	cELISA	Positive
133	133	Blood, Oropharyngeal swab and cloacal swabs	2015	Tanguar wetland	Kalmakanda	Sylhet	Bangladesh	Chattogram Veterinary and Animal Sciences University	Anas platyrhynchos domesticus	Domestic duck	Healthy	Active surveillance	Undefined	Adult	Household	with chicken	53	5	Illitarate	real-time RT-PCR	Negative	cELISA	Positive
134	134	Blood, Oropharyngeal swab and cloacal swabs	2015	Tanguar wetland	Kalmakanda	Sylhet	Bangladesh	Chattogram Veterinary and Animal Sciences University	Anas platyrhynchos domesticus	Domestic duck	Healthy	Active surveillance	Undefined	Adult	Household	with chicken	54	7	Illitarate	real-time RT-PCR	Negative	cELISA	Positive
135	135	Blood, Oropharyngeal swab and cloacal swabs	2015	Tanguar wetland	Kalmakanda	Sylhet	Bangladesh	Chattogram Veterinary and Animal Sciences University	Anas platyrhynchos domesticus	Domestic duck	Healthy	Active surveillance	Undefined	Adult	Household	with chicken	55	7	Illitarate	real-time RT-PCR	Negative	cELISA	Positive
136	136	Blood, Oropharyngeal swab and cloacal swabs	2015	Tanguar wetland	Kalmakanda	Sylhet	Bangladesh	Chattogram Veterinary and Animal Sciences University	Anas platyrhynchos domesticus	Domestic duck	Healthy	Active surveillance	Undefined	Adult	Household	with chicken	56	9	Illitarate	real-time RT-PCR	Negative	cELISA	Positive
137	137	Blood, Oropharyngeal swab and cloacal swabs	2015	Tanguar wetland	Kalmakanda	Sylhet	Bangladesh	Chattogram Veterinary and Animal Sciences University	Anas platyrhynchos domesticus	Domestic duck	Healthy	Active surveillance	Undefined	Adult	Household	with chicken	57	5	Illitarate	real-time RT-PCR	Negative	cELISA	Positive
138	138	Blood, Oropharyngeal swab and cloacal swabs	2015	Tanguar wetland	Kalmakanda	Sylhet	Bangladesh	Chattogram Veterinary and Animal Sciences University	Anas platyrhynchos domesticus	Domestic duck	Healthy	Active surveillance	Undefined	Adult	Household	with chicken	58	10	Illitarate	real-time RT-PCR	Negative	cELISA	Positive
139	139	Blood, Oropharyngeal swab and cloacal swabs	2015	Tanguar wetland	Kalmakanda	Sylhet	Bangladesh	Chattogram Veterinary and Animal Sciences University	Anas platyrhynchos domesticus	Domestic duck	Healthy	Active surveillance	Undefined	Adult	Household	with chicken	59	9	Illitarate	real-time RT-PCR	Negative	cELISA	Positive
140	140	Blood, Oropharyngeal swab and cloacal swabs	2015	Tanguar wetland	Kalmakanda	Sylhet	Bangladesh	Chattogram Veterinary and Animal Sciences University	Anas platyrhynchos domesticus	Domestic duck	Healthy	Active surveillance	Undefined	Adult	Household	with chicken	60	6	Illitarate	real-time RT-PCR	Negative	cELISA	Positive
141	141	Blood, Oropharyngeal swab and cloacal swabs	2015	Tanguar wetland	Kalmakanda	Sylhet	Bangladesh	Chattogram Veterinary and Animal Sciences University	Anas platyrhynchos domesticus	Domestic duck	Healthy	Active surveillance	Undefined	Adult	Household	with chicken	61	5	Illitarate	real-time RT-PCR	Negative	cELISA	Positive
142	142	Blood, Oropharyngeal swab and cloacal swabs	2015	Tanguar wetland	Kalmakanda	Sylhet	Bangladesh	Chattogram Veterinary and Animal Sciences University	Anas platyrhynchos domesticus	Domestic duck	Healthy	Active surveillance	Undefined	Adult	Household	without chicken	62	5	Literate	real-time RT-PCR	Negative	cELISA	Positive
143	143	Blood, Oropharyngeal swab and cloacal swabs	2015	Tanguar wetland	Kalmakanda	Sylhet	Bangladesh	Chattogram Veterinary and Animal Sciences University	Anas platyrhynchos domesticus	Domestic duck	Healthy	Active surveillance	Undefined	Adult	Household	without chicken	63	7	Literate	real-time RT-PCR	Negative	cELISA	Positive
144	144	Blood, Oropharyngeal swab and cloacal swabs	2015	Tanguar wetland	Kalmakanda	Sylhet	Bangladesh	Chattogram Veterinary and Animal Sciences University	Anas platyrhynchos domesticus	Domestic duck	Healthy	Active surveillance	Undefined	Adult	Household	without chicken	64	6	Literate	real-time RT-PCR	Negative	cELISA	Positive
145	145	Blood, Oropharyngeal swab and cloacal swabs	2015	Tanguar wetland	Tahirpur	Sylhet	Bangladesh	Chattogram Veterinary and Animal Sciences University	Anas platyrhynchos domesticus	Domestic duck	Healthy	Active surveillance	Undefined	Adult	Household	without chicken	65	8	Literate	real-time RT-PCR	Negative	cELISA	Positive
146	146	Blood, Oropharyngeal swab and cloacal swabs	2015	Tanguar wetland	Tahirpur	Sylhet	Bangladesh	Chattogram Veterinary and Animal Sciences University	Anas platyrhynchos domesticus	Domestic duck	Healthy	Active surveillance	Undefined	Adult	Household	with chicken	66	7	Illitarate	real-time RT-PCR	Negative	cELISA	Positive
147	147	Blood, Oropharyngeal swab and cloacal swabs	2015	Tanguar wetland	Tahirpur	Sylhet	Bangladesh	Chattogram Veterinary and Animal Sciences University	Anas platyrhynchos domesticus	Domestic duck	Healthy	Active surveillance	Undefined	Adult	Household	with chicken	67	5	Illitarate	real-time RT-PCR	Negative	cELISA	Positive
148	148	Blood, Oropharyngeal swab and cloacal swabs	2015	Tanguar wetland	Tahirpur	Sylhet	Bangladesh	Chattogram Veterinary and Animal Sciences University	Anas platyrhynchos domesticus	Domestic duck	Healthy	Active surveillance	Undefined	Adult	Household	with chicken	68	8	Illitarate	real-time RT-PCR	Negative	cELISA	Positive
149	149	Blood, Oropharyngeal swab and cloacal swabs	2015	Tanguar wetland	Tahirpur	Sylhet	Bangladesh	Chattogram Veterinary and Animal Sciences University	Anas platyrhynchos domesticus	Domestic duck	Healthy	Active surveillance	Undefined	Adult	Household	with chicken	69	6	Illitarate	real-time RT-PCR	Negative	cELISA	Positive
150	150	Blood, Oropharyngeal swab and cloacal swabs	2015	Tanguar wetland	Tahirpur	Sylhet	Bangladesh	Chattogram Veterinary and Animal Sciences University	Anas platyrhynchos domesticus	Domestic duck	Healthy	Active surveillance	Undefined	Adult	Household	with chicken	70	7	Illitarate	real-time RT-PCR	Negative	cELISA	Positive
151	151	Blood, Oropharyngeal swab and cloacal swabs	2015	Tanguar wetland	Tahirpur	Sylhet	Bangladesh	Chattogram Veterinary and Animal Sciences University	Anas platyrhynchos domesticus	Domestic duck	Healthy	Active surveillance	Undefined	Adult	Household	with chicken	71	9	Illitarate	real-time RT-PCR	Negative	cELISA	Positive
152	152	Blood, Oropharyngeal swab and cloacal swabs	2015	Tanguar wetland	Tahirpur	Sylhet	Bangladesh	Chattogram Veterinary and Animal Sciences University	Anas platyrhynchos domesticus	Domestic duck	Healthy	Active surveillance	Undefined	Adult	Household	with chicken	72	5	Illitarate	real-time RT-PCR	Negative	cELISA	Positive
153	153	Blood, Oropharyngeal swab and cloacal swabs	2015	Tanguar wetland	Tahirpur	Sylhet	Bangladesh	Chattogram Veterinary and Animal Sciences University	Anas platyrhynchos domesticus	Domestic duck	Healthy	Active surveillance	Undefined	Adult	Household	with chicken	73	8	Illitarate	real-time RT-PCR	Negative	cELISA	Positive
154	154	Blood, Oropharyngeal swab and cloacal swabs	2015	Tanguar wetland	Tahirpur	Sylhet	Bangladesh	Chattogram Veterinary and Animal Sciences University	Anas platyrhynchos domesticus	Domestic duck	Healthy	Active surveillance	Undefined	Adult	Household	with chicken	74	5	Illitarate	real-time RT-PCR	Negative	cELISA	Positive
155	155	Blood, Oropharyngeal swab and cloacal swabs	2015	Tanguar wetland	Tahirpur	Sylhet	Bangladesh	Chattogram Veterinary and Animal Sciences University	Anas platyrhynchos domesticus	Domestic duck	Healthy	Active surveillance	Undefined	Adult	Household	with chicken	75	6	Illitarate	real-time RT-PCR	Negative	cELISA	Positive
156	156	Blood, Oropharyngeal swab and cloacal swabs	2015	Tanguar wetland	Tahirpur	Sylhet	Bangladesh	Chattogram Veterinary and Animal Sciences University	Anas platyrhynchos domesticus	Domestic duck	Healthy	Active surveillance	Undefined	Adult	Household	without chicken	76	8	Literate	real-time RT-PCR	Negative	cELISA	Positive
157	157	Blood, Oropharyngeal swab and cloacal swabs	2015	Tanguar wetland	Tahirpur	Sylhet	Bangladesh	Chattogram Veterinary and Animal Sciences University	Anas platyrhynchos domesticus	Domestic duck	Healthy	Active surveillance	Undefined	Adult	Household	without chicken	77	5	Literate	real-time RT-PCR	Negative	cELISA	Positive
158	158	Blood, Oropharyngeal swab and cloacal swabs	2015	Tanguar wetland	Tahirpur	Sylhet	Bangladesh	Chattogram Veterinary and Animal Sciences University	Anas platyrhynchos domesticus	Domestic duck	Healthy	Active surveillance	Undefined	Adult	Household	without chicken	78	8	Literate	real-time RT-PCR	Negative	cELISA	Positive
159	159	Blood, Oropharyngeal swab and cloacal swabs	2015	Tanguar wetland	Tahirpur	Sylhet	Bangladesh	Chattogram Veterinary and Animal Sciences University	Anas platyrhynchos domesticus	Domestic duck	Healthy	Active surveillance	Undefined	Adult	Household	without chicken	79	9	Literate	real-time RT-PCR	Negative	cELISA	Positive
160	160	Blood, Oropharyngeal swab and cloacal swabs	2015	Tanguar wetland	Tahirpur	Sylhet	Bangladesh	Chattogram Veterinary and Animal Sciences University	Anas platyrhynchos domesticus	Domestic duck	Healthy	Active surveillance	Undefined	Adult	Household	without chicken	80	6	Literate	real-time RT-PCR	Negative	cELISA	Positive
161	161	Blood, Oropharyngeal swab and cloacal swabs	2015	Tanguar wetland	Tahirpur	Sylhet	Bangladesh	Chattogram Veterinary and Animal Sciences University	Anas platyrhynchos domesticus	Domestic duck	Healthy	Active surveillance	Undefined	Adult	Household	without chicken	81	7	Illitarate	real-time RT-PCR	Negative	cELISA	Negative
162	162	Blood, Oropharyngeal swab and cloacal swabs	2015	Tanguar wetland	Tahirpur	Sylhet	Bangladesh	Chattogram Veterinary and Animal Sciences University	Anas platyrhynchos domesticus	Domestic duck	Healthy	Active surveillance	Undefined	Adult	Household	without chicken	82	7	Illitarate	real-time RT-PCR	Negative	cELISA	Positive
163	163	Blood, Oropharyngeal swab and cloacal swabs	2015	Tanguar wetland	Tahirpur	Sylhet	Bangladesh	Chattogram Veterinary and Animal Sciences University	Anas platyrhynchos domesticus	Domestic duck	Healthy	Active surveillance	Undefined	Adult	Household	without chicken	83	6	Illitarate	real-time RT-PCR	Negative	cELISA	Positive
164	164	Blood, Oropharyngeal swab and cloacal swabs	2015	Tanguar wetland	Tahirpur	Sylhet	Bangladesh	Chattogram Veterinary and Animal Sciences University	Anas platyrhynchos domesticus	Domestic duck	Healthy	Active surveillance	Undefined	Adult	Household	without chicken	84	5	Illitarate	real-time RT-PCR	Negative	cELISA	Positive
165	165	Blood, Oropharyngeal swab and cloacal swabs	2015	Tanguar wetland	Tahirpur	Sylhet	Bangladesh	Chattogram Veterinary and Animal Sciences University	Anas platyrhynchos domesticus	Domestic duck	Healthy	Active surveillance	Undefined	Adult	Household	without chicken	85	12	Illitarate	real-time RT-PCR	Negative	cELISA	Positive
166	166	Blood, Oropharyngeal swab and cloacal swabs	2015	Tanguar wetland	Tahirpur	Sylhet	Bangladesh	Chattogram Veterinary and Animal Sciences University	Anas platyrhynchos domesticus	Domestic duck	Healthy	Active surveillance	Undefined	Adult	Household	without chicken	86	10	Literate	real-time RT-PCR	Negative	cELISA	Negative
167	167	Blood, Oropharyngeal swab and cloacal swabs	2015	Tanguar wetland	Tahirpur	Sylhet	Bangladesh	Chattogram Veterinary and Animal Sciences University	Anas platyrhynchos domesticus	Domestic duck	Healthy	Active surveillance	Undefined	Adult	Household	without chicken	87	9	Literate	real-time RT-PCR	Negative	cELISA	Positive
168	168	Blood, Oropharyngeal swab and cloacal swabs	2015	Tanguar wetland	Tahirpur	Sylhet	Bangladesh	Chattogram Veterinary and Animal Sciences University	Anas platyrhynchos domesticus	Domestic duck	Healthy	Active surveillance	Undefined	Adult	Household	without chicken	88	8	Literate	real-time RT-PCR	Negative	cELISA	Negative
169	169	Blood, Oropharyngeal swab and cloacal swabs	2015	Tanguar wetland	Tahirpur	Sylhet	Bangladesh	Chattogram Veterinary and Animal Sciences University	Anas platyrhynchos domesticus	Domestic duck	Healthy	Active surveillance	Undefined	Adult	Household	without chicken	89	5	Literate	real-time RT-PCR	Negative	cELISA	Negative
170	170	Blood, Oropharyngeal swab and cloacal swabs	2015	Tanguar wetland	Tahirpur	Sylhet	Bangladesh	Chattogram Veterinary and Animal Sciences University	Anas platyrhynchos domesticus	Domestic duck	Healthy	Active surveillance	Undefined	Adult	Household	without chicken	90	6	Literate	real-time RT-PCR	Negative	cELISA	Negative
171	171	Blood, Oropharyngeal swab and cloacal swabs	2015	Tanguar wetland	Tahirpur	Sylhet	Bangladesh	Chattogram Veterinary and Animal Sciences University	Anas platyrhynchos domesticus	Domestic duck	Healthy	Active surveillance	Undefined	Adult	Household	with chicken	91	7	Literate	real-time RT-PCR	Negative	cELISA	Negative
172	172	Blood, Oropharyngeal swab and cloacal swabs	2015	Tanguar wetland	Tahirpur	Sylhet	Bangladesh	Chattogram Veterinary and Animal Sciences University	Anas platyrhynchos domesticus	Domestic duck	Healthy	Active surveillance	Undefined	Adult	Household	with chicken	92	6	Literate	real-time RT-PCR	Negative	cELISA	Negative
173	173	Blood, Oropharyngeal swab and cloacal swabs	2015	Tanguar wetland	Tahirpur	Sylhet	Bangladesh	Chattogram Veterinary and Animal Sciences University	Anas platyrhynchos domesticus	Domestic duck	Healthy	Active surveillance	Undefined	Adult	Household	with chicken	93	6	Literate	real-time RT-PCR	Negative	cELISA	Positive
174	174	Blood, Oropharyngeal swab and cloacal swabs	2015	Tanguar wetland	Tahirpur	Sylhet	Bangladesh	Chattogram Veterinary and Animal Sciences University	Anas platyrhynchos domesticus	Domestic duck	Healthy	Active surveillance	Undefined	Adult	Household	with chicken	94	5	Literate	real-time RT-PCR	Negative	cELISA	Positive
175	175	Blood, Oropharyngeal swab and cloacal swabs	2015	Tanguar wetland	Tahirpur	Sylhet	Bangladesh	Chattogram Veterinary and Animal Sciences University	Anas platyrhynchos domesticus	Domestic duck	Healthy	Active surveillance	Undefined	Adult	Free-range domestic	waterfowl	17	310	Literate	real-time RT-PCR	Negative	cELISA	Positive
176	176	Blood, Oropharyngeal swab and cloacal swabs	2015	Tanguar wetland	Tahirpur	Sylhet	Bangladesh	Chattogram Veterinary and Animal Sciences University	Anas platyrhynchos domesticus	Domestic duck	Healthy	Active surveillance	Undefined	Adult	Free-range domestic	waterfowl	17	310	Literate	real-time RT-PCR	Negative	cELISA	Negative
177	177	Blood, Oropharyngeal swab and cloacal swabs	2015	Tanguar wetland	Tahirpur	Sylhet	Bangladesh	Chattogram Veterinary and Animal Sciences University	Anas platyrhynchos domesticus	Domestic duck	Healthy	Active surveillance	Undefined	Adult	Free-range domestic	waterfowl	17	310	Literate	real-time RT-PCR	Negative	cELISA	Negative
178	178	Blood, Oropharyngeal swab and cloacal swabs	2015	Tanguar wetland	Tahirpur	Sylhet	Bangladesh	Chattogram Veterinary and Animal Sciences University	Anas platyrhynchos domesticus	Domestic duck	Healthy	Active surveillance	Undefined	Adult	Free-range domestic	waterfowl	17	310	Literate	real-time RT-PCR	Negative	cELISA	Negative
179	179	Blood, Oropharyngeal swab and cloacal swabs	2015	Tanguar wetland	Tahirpur	Sylhet	Bangladesh	Chattogram Veterinary and Animal Sciences University	Anas platyrhynchos domesticus	Domestic duck	Healthy	Active surveillance	Undefined	Adult	Free-range domestic	waterfowl	17	310	Literate	real-time RT-PCR	Negative	cELISA	Negative
180	180	Blood, Oropharyngeal swab and cloacal swabs	2015	Tanguar wetland	Tahirpur	Sylhet	Bangladesh	Chattogram Veterinary and Animal Sciences University	Anas platyrhynchos domesticus	Domestic duck	Healthy	Active surveillance	Undefined	Adult	Free-range domestic	waterfowl	18	367	Illitarate	real-time RT-PCR	Negative	cELISA	Negative
181	181	Blood, Oropharyngeal swab and cloacal swabs	2015	Tanguar wetland	Tahirpur	Sylhet	Bangladesh	Chattogram Veterinary and Animal Sciences University	Anas platyrhynchos domesticus	Domestic duck	Healthy	Active surveillance	Undefined	Adult	Free-range domestic	waterfowl	18	367	Illitarate	real-time RT-PCR	Negative	cELISA	Positive
182	182	Blood, Oropharyngeal swab and cloacal swabs	2015	Tanguar wetland	Tahirpur	Sylhet	Bangladesh	Chattogram Veterinary and Animal Sciences University	Anas platyrhynchos domesticus	Domestic duck	Healthy	Active surveillance	Undefined	Adult	Free-range domestic	waterfowl	18	367	Illitarate	real-time RT-PCR	Negative	cELISA	Negative
183	183	Blood, Oropharyngeal swab and cloacal swabs	2015	Tanguar wetland	Tahirpur	Sylhet	Bangladesh	Chattogram Veterinary and Animal Sciences University	Anas platyrhynchos domesticus	Domestic duck	Healthy	Active surveillance	Undefined	Adult	Free-range domestic	waterfowl	18	367	Illitarate	real-time RT-PCR	Negative	cELISA	Positive
184	184	Blood, Oropharyngeal swab and cloacal swabs	2015	Tanguar wetland	Tahirpur	Sylhet	Bangladesh	Chattogram Veterinary and Animal Sciences University	Anas platyrhynchos domesticus	Domestic duck	Healthy	Active surveillance	Undefined	Adult	Free-range domestic	waterfowl	18	367	Illitarate	real-time RT-PCR	Negative	cELISA	Positive
185	185	Blood, Oropharyngeal swab and cloacal swabs	2015	Tanguar wetland	Dharmapasha	Sylhet	Bangladesh	Chattogram Veterinary and Animal Sciences University	Anas platyrhynchos domesticus	Domestic duck	Healthy	Active surveillance	Undefined	Adult	Free-range domestic	waterfowl	19	800	Illitarate	real-time RT-PCR	Negative	cELISA	Negative
186	186	Blood, Oropharyngeal swab and cloacal swabs	2015	Tanguar wetland	Dharmapasha	Sylhet	Bangladesh	Chattogram Veterinary and Animal Sciences University	Anas platyrhynchos domesticus	Domestic duck	Healthy	Active surveillance	Undefined	Adult	Free-range domestic	waterfowl	19	800	Illitarate	real-time RT-PCR	Negative	cELISA	Negative
187	187	Blood, Oropharyngeal swab and cloacal swabs	2015	Tanguar wetland	Dharmapasha	Sylhet	Bangladesh	Chattogram Veterinary and Animal Sciences University	Anas platyrhynchos domesticus	Domestic duck	Healthy	Active surveillance	Undefined	Adult	Free-range domestic	waterfowl	19	800	Illitarate	real-time RT-PCR	Negative	cELISA	Negative
188	188	Blood, Oropharyngeal swab and cloacal swabs	2015	Tanguar wetland	Dharmapasha	Sylhet	Bangladesh	Chattogram Veterinary and Animal Sciences University	Anas platyrhynchos domesticus	Domestic duck	Healthy	Active surveillance	Undefined	Adult	Free-range domestic	waterfowl	19	800	Illitarate	real-time RT-PCR	Negative	cELISA	Negative
189	189	Blood, Oropharyngeal swab and cloacal swabs	2015	Tanguar wetland	Dharmapasha	Sylhet	Bangladesh	Chattogram Veterinary and Animal Sciences University	Anas platyrhynchos domesticus	Domestic duck	Healthy	Active surveillance	Undefined	Adult	Free-range domestic	waterfowl	19	800	Illitarate	real-time RT-PCR	Negative	cELISA	Negative
190	190	Blood, Oropharyngeal swab and cloacal swabs	2015	Tanguar wetland	Dharmapasha	Sylhet	Bangladesh	Chattogram Veterinary and Animal Sciences University	Anas platyrhynchos domesticus	Domestic duck	Healthy	Active surveillance	Undefined	Adult	Free-range domestic	waterfowl	20	760	Illitarate	real-time RT-PCR	Negative	cELISA	Negative
191	191	Blood, Oropharyngeal swab and cloacal swabs	2015	Tanguar wetland	Dharmapasha	Sylhet	Bangladesh	Chattogram Veterinary and Animal Sciences University	Anas platyrhynchos domesticus	Domestic duck	Healthy	Active surveillance	Undefined	Adult	Free-range domestic	waterfowl	20	760	Illitarate	real-time RT-PCR	Negative	cELISA	Negative
192	192	Blood, Oropharyngeal swab and cloacal swabs	2015	Tanguar wetland	Dharmapasha	Sylhet	Bangladesh	Chattogram Veterinary and Animal Sciences University	Anas platyrhynchos domesticus	Domestic duck	Healthy	Active surveillance	Undefined	Adult	Free-range domestic	waterfowl	20	760	Illitarate	real-time RT-PCR	Negative	cELISA	Negative
193	193	Blood, Oropharyngeal swab and cloacal swabs	2015	Hakaluki wetland	Shekpur	Sylhet	Bangladesh	Chattogram Veterinary and Animal Sciences University	Anas platyrhynchos domesticus	Domestic duck	Healthy	Active surveillance	Undefined	Adult	Household	without chicken	95	9	Literate	real-time RT-PCR	Negative	cELISA	Positive
194	194	Blood, Oropharyngeal swab and cloacal swabs	2015	Hakaluki wetland	Shekpur	Sylhet	Bangladesh	Chattogram Veterinary and Animal Sciences University	Anas platyrhynchos domesticus	Domestic duck	Healthy	Active surveillance	Undefined	Adult	Household	without chicken	96	7	Literate	real-time RT-PCR	Negative	cELISA	Negative
195	195	Blood, Oropharyngeal swab and cloacal swabs	2015	Hakaluki wetland	Shekpur	Sylhet	Bangladesh	Chattogram Veterinary and Animal Sciences University	Anas platyrhynchos domesticus	Domestic duck	Healthy	Active surveillance	Undefined	Adult	Household	without chicken	97	8	Literate	real-time RT-PCR	Negative	cELISA	Negative
196	196	Blood, Oropharyngeal swab and cloacal swabs	2015	Hakaluki wetland	Shekpur	Sylhet	Bangladesh	Chattogram Veterinary and Animal Sciences University	Anas platyrhynchos domesticus	Domestic duck	Healthy	Active surveillance	Undefined	Adult	Household	without chicken	98	5	Literate	real-time RT-PCR	Negative	cELISA	Negative
197	197	Blood, Oropharyngeal swab and cloacal swabs	2015	Hakaluki wetland	Shekpur	Sylhet	Bangladesh	Chattogram Veterinary and Animal Sciences University	Anas platyrhynchos domesticus	Domestic duck	Healthy	Active surveillance	Undefined	Adult	Household	without chicken	99	6	Literate	real-time RT-PCR	Negative	cELISA	Positive
198	198	Blood, Oropharyngeal swab and cloacal swabs	2015	Hakaluki wetland	Shekpur	Sylhet	Bangladesh	Chattogram Veterinary and Animal Sciences University	Anas platyrhynchos domesticus	Domestic duck	Healthy	Active surveillance	Undefined	Adult	Household	without chicken	100	6	Literate	real-time RT-PCR	Negative	cELISA	Positive
199	199	Blood, Oropharyngeal swab and cloacal swabs	2015	Hakaluki wetland	Shekpur	Sylhet	Bangladesh	Chattogram Veterinary and Animal Sciences University	Anas platyrhynchos domesticus	Domestic duck	Healthy	Active surveillance	Undefined	Adult	Household	without chicken	101	7	Literate	real-time RT-PCR	Negative	cELISA	Negative
200	200	Blood, Oropharyngeal swab and cloacal swabs	2015	Hakaluki wetland	Shekpur	Sylhet	Bangladesh	Chattogram Veterinary and Animal Sciences University	Anas platyrhynchos domesticus	Domestic duck	Healthy	Active surveillance	Undefined	Adult	Household	without chicken	102	9	Literate	real-time RT-PCR	Negative	cELISA	Negative
201	201	Blood, Oropharyngeal swab and cloacal swabs	2015	Hakaluki wetland	Shekpur	Sylhet	Bangladesh	Chattogram Veterinary and Animal Sciences University	Anas platyrhynchos domesticus	Domestic duck	Healthy	Active surveillance	Undefined	Adult	Household	with chicken	103	7	Illitarate	real-time RT-PCR	Negative	cELISA	Positive
202	202	Blood, Oropharyngeal swab and cloacal swabs	2015	Hakaluki wetland	Shekpur	Sylhet	Bangladesh	Chattogram Veterinary and Animal Sciences University	Anas platyrhynchos domesticus	Domestic duck	Healthy	Active surveillance	Undefined	Adult	Household	with chicken	104	8	Illitarate	real-time RT-PCR	Negative	cELISA	Positive
203	203	Blood, Oropharyngeal swab and cloacal swabs	2015	Hakaluki wetland	Shekpur	Sylhet	Bangladesh	Chattogram Veterinary and Animal Sciences University	Anas platyrhynchos domesticus	Domestic duck	Healthy	Active surveillance	Undefined	Adult	Household	with chicken	105	5	Illitarate	real-time RT-PCR	Negative	cELISA	Positive
204	204	Blood, Oropharyngeal swab and cloacal swabs	2015	Hakaluki wetland	Shekpur	Sylhet	Bangladesh	Chattogram Veterinary and Animal Sciences University	Anas platyrhynchos domesticus	Domestic duck	Healthy	Active surveillance	Undefined	Adult	Household	with chicken	106	7	Illitarate	real-time RT-PCR	Negative	cELISA	Positive
205	205	Blood, Oropharyngeal swab and cloacal swabs	2015	Hakaluki wetland	Shekpur	Sylhet	Bangladesh	Chattogram Veterinary and Animal Sciences University	Anas platyrhynchos domesticus	Domestic duck	Healthy	Active surveillance	Undefined	Adult	Household	with chicken	107	8	Illitarate	real-time RT-PCR	Negative	cELISA	Positive
206	206	Blood, Oropharyngeal swab and cloacal swabs	2015	Hakaluki wetland	Shekpur	Sylhet	Bangladesh	Chattogram Veterinary and Animal Sciences University	Anas platyrhynchos domesticus	Domestic duck	Healthy	Active surveillance	Undefined	Adult	Household	with chicken	108	5	Illitarate	real-time RT-PCR	Negative	cELISA	Negative
207	207	Blood, Oropharyngeal swab and cloacal swabs	2015	Hakaluki wetland	Shekpur	Sylhet	Bangladesh	Chattogram Veterinary and Animal Sciences University	Anas platyrhynchos domesticus	Domestic duck	Healthy	Active surveillance	Undefined	Adult	Household	without chicken	109	6	Illitarate	real-time RT-PCR	Negative	cELISA	Negative
208	208	Blood, Oropharyngeal swab and cloacal swabs	2015	Hakaluki wetland	Shekpur	Sylhet	Bangladesh	Chattogram Veterinary and Animal Sciences University	Anas platyrhynchos domesticus	Domestic duck	Healthy	Active surveillance	Undefined	Adult	Household	without chicken	110	6	Illitarate	real-time RT-PCR	Negative	cELISA	Negative
209	209	Blood, Oropharyngeal swab and cloacal swabs	2015	Hakaluki wetland	Shekpur	Sylhet	Bangladesh	Chattogram Veterinary and Animal Sciences University	Anas platyrhynchos domesticus	Domestic duck	Healthy	Active surveillance	Undefined	Adult	Household	with chicken	111	8	Literate	real-time RT-PCR	Negative	cELISA	Positive
210	210	Blood, Oropharyngeal swab and cloacal swabs	2015	Hakaluki wetland	Shekpur	Sylhet	Bangladesh	Chattogram Veterinary and Animal Sciences University	Anas platyrhynchos domesticus	Domestic duck	Healthy	Active surveillance	Undefined	Adult	Household	without chicken	112	5	Literate	real-time RT-PCR	Negative	cELISA	Negative
211	211	Blood, Oropharyngeal swab and cloacal swabs	2015	Hakaluki wetland	Shekpur	Sylhet	Bangladesh	Chattogram Veterinary and Animal Sciences University	Anas platyrhynchos domesticus	Domestic duck	Healthy	Active surveillance	Undefined	Adult	Household	without chicken	113	9	Literate	real-time RT-PCR	Negative	cELISA	Negative
212	212	Blood, Oropharyngeal swab and cloacal swabs	2015	Hakaluki wetland	Shekpur	Sylhet	Bangladesh	Chattogram Veterinary and Animal Sciences University	Anas platyrhynchos domesticus	Domestic duck	Healthy	Active surveillance	Undefined	Adult	Household	without chicken	114	6	Literate	real-time RT-PCR	Negative	cELISA	Negative
213	213	Blood, Oropharyngeal swab and cloacal swabs	2015	Hakaluki wetland	Shekpur	Sylhet	Bangladesh	Chattogram Veterinary and Animal Sciences University	Anas platyrhynchos domesticus	Domestic duck	Healthy	Active surveillance	Undefined	Adult	Household	without chicken	115	8	Literate	real-time RT-PCR	Negative	cELISA	Negative
214	214	Blood, Oropharyngeal swab and cloacal swabs	2015	Hakaluki wetland	Shekpur	Sylhet	Bangladesh	Chattogram Veterinary and Animal Sciences University	Anas platyrhynchos domesticus	Domestic duck	Healthy	Active surveillance	Undefined	Adult	Household	without chicken	116	5	Literate	real-time RT-PCR	Negative	cELISA	Positive
215	215	Blood, Oropharyngeal swab and cloacal swabs	2015	Hakaluki wetland	Shekpur	Sylhet	Bangladesh	Chattogram Veterinary and Animal Sciences University	Anas platyrhynchos domesticus	Domestic duck	Healthy	Active surveillance	Undefined	Adult	Household	without chicken	117	6	Literate	real-time RT-PCR	Negative	cELISA	Negative
216	216	Blood, Oropharyngeal swab and cloacal swabs	2015	Hakaluki wetland	Shekpur	Sylhet	Bangladesh	Chattogram Veterinary and Animal Sciences University	Anas platyrhynchos domesticus	Domestic duck	Healthy	Active surveillance	Undefined	Adult	Household	with chicken	118	5	Literate	real-time RT-PCR	Negative	cELISA	Negative
217	217	Blood, Oropharyngeal swab and cloacal swabs	2015	Hakaluki wetland	Shekpur	Sylhet	Bangladesh	Chattogram Veterinary and Animal Sciences University	Anas platyrhynchos domesticus	Domestic duck	Healthy	Active surveillance	Undefined	Adult	Household	with chicken	119	8	Literate	real-time RT-PCR	Negative	cELISA	Negative
218	218	Blood, Oropharyngeal swab and cloacal swabs	2015	Hakaluki wetland	Shekpur	Sylhet	Bangladesh	Chattogram Veterinary and Animal Sciences University	Anas platyrhynchos domesticus	Domestic duck	Healthy	Active surveillance	Undefined	Adult	Household	with chicken	120	7	Literate	real-time RT-PCR	Negative	cELISA	Negative
219	219	Blood, Oropharyngeal swab and cloacal swabs	2015	Hakaluki wetland	Jaifornagar	Sylhet	Bangladesh	Chattogram Veterinary and Animal Sciences University	Anas platyrhynchos domesticus	Domestic duck	Healthy	Active surveillance	Undefined	Adult	Household	with chicken	121	5	Literate	real-time RT-PCR	Negative	cELISA	Positive
220	220	Blood, Oropharyngeal swab and cloacal swabs	2015	Hakaluki wetland	Jaifornagar	Sylhet	Bangladesh	Chattogram Veterinary and Animal Sciences University	Anas platyrhynchos domesticus	Domestic duck	Healthy	Active surveillance	Undefined	Adult	Household	with chicken	122	8	Literate	real-time RT-PCR	Negative	cELISA	Positive
221	221	Blood, Oropharyngeal swab and cloacal swabs	2015	Hakaluki wetland	Jaifornagar	Sylhet	Bangladesh	Chattogram Veterinary and Animal Sciences University	Anas platyrhynchos domesticus	Domestic duck	Healthy	Active surveillance	Undefined	Adult	Household	with chicken	123	6	Literate	real-time RT-PCR	Negative	cELISA	Negative
222	222	Blood, Oropharyngeal swab and cloacal swabs	2015	Hakaluki wetland	Jaifornagar	Sylhet	Bangladesh	Chattogram Veterinary and Animal Sciences University	Anas platyrhynchos domesticus	Domestic duck	Healthy	Active surveillance	Undefined	Adult	Household	with chicken	124	9	Literate	real-time RT-PCR	Negative	cELISA	Positive
223	223	Blood, Oropharyngeal swab and cloacal swabs	2015	Hakaluki wetland	Jaifornagar	Sylhet	Bangladesh	Chattogram Veterinary and Animal Sciences University	Anas platyrhynchos domesticus	Domestic duck	Healthy	Active surveillance	Undefined	Adult	Household	without chicken	125	7	Literate	real-time RT-PCR	Negative	cELISA	Positive
224	224	Blood, Oropharyngeal swab and cloacal swabs	2015	Hakaluki wetland	Jaifornagar	Sylhet	Bangladesh	Chattogram Veterinary and Animal Sciences University	Anas platyrhynchos domesticus	Domestic duck	Healthy	Active surveillance	Undefined	Adult	Household	without chicken	126	5	Literate	real-time RT-PCR	Negative	cELISA	Positive
225	225	Blood, Oropharyngeal swab and cloacal swabs	2015	Hakaluki wetland	Jaifornagar	Sylhet	Bangladesh	Chattogram Veterinary and Animal Sciences University	Anas platyrhynchos domesticus	Domestic duck	Healthy	Active surveillance	Undefined	Adult	Household	without chicken	127	8	Literate	real-time RT-PCR	Negative	cELISA	Negative
226	226	Blood, Oropharyngeal swab and cloacal swabs	2015	Hakaluki wetland	Jaifornagar	Sylhet	Bangladesh	Chattogram Veterinary and Animal Sciences University	Anas platyrhynchos domesticus	Domestic duck	Healthy	Active surveillance	Undefined	Adult	Household	without chicken	128	6	Literate	real-time RT-PCR	Negative	cELISA	Positive
227	227	Blood, Oropharyngeal swab and cloacal swabs	2015	Hakaluki wetland	Jaifornagar	Sylhet	Bangladesh	Chattogram Veterinary and Animal Sciences University	Anas platyrhynchos domesticus	Domestic duck	Healthy	Active surveillance	Undefined	Adult	Household	without chicken	129	7	Literate	real-time RT-PCR	Negative	cELISA	Negative
228	228	Blood, Oropharyngeal swab and cloacal swabs	2015	Hakaluki wetland	Jaifornagar	Sylhet	Bangladesh	Chattogram Veterinary and Animal Sciences University	Anas platyrhynchos domesticus	Domestic duck	Healthy	Active surveillance	Undefined	Adult	Household	without chicken	130	5	Literate	real-time RT-PCR	Negative	cELISA	Negative
229	229	Blood, Oropharyngeal swab and cloacal swabs	2015	Hakaluki wetland	Jaifornagar	Sylhet	Bangladesh	Chattogram Veterinary and Animal Sciences University	Anas platyrhynchos domesticus	Domestic duck	Healthy	Active surveillance	Undefined	Adult	Household	without chicken	131	5	Literate	real-time RT-PCR	Negative	cELISA	Positive
230	230	Blood, Oropharyngeal swab and cloacal swabs	2015	Hakaluki wetland	Jaifornagar	Sylhet	Bangladesh	Chattogram Veterinary and Animal Sciences University	Anas platyrhynchos domesticus	Domestic duck	Healthy	Active surveillance	Undefined	Adult	Household	without chicken	132	9	Literate	real-time RT-PCR	Negative	cELISA	Positive
231	231	Blood, Oropharyngeal swab and cloacal swabs	2015	Hakaluki wetland	Jaifornagar	Sylhet	Bangladesh	Chattogram Veterinary and Animal Sciences University	Anas platyrhynchos domesticus	Domestic duck	Healthy	Active surveillance	Undefined	Adult	Household	without chicken	133	5	Literate	real-time RT-PCR	Negative	cELISA	Positive
232	232	Blood, Oropharyngeal swab and cloacal swabs	2015	Hakaluki wetland	Jaifornagar	Sylhet	Bangladesh	Chattogram Veterinary and Animal Sciences University	Anas platyrhynchos domesticus	Domestic duck	Healthy	Active surveillance	Undefined	Adult	Household	without chicken	134	8	Literate	real-time RT-PCR	Negative	cELISA	Negative
233	233	Blood, Oropharyngeal swab and cloacal swabs	2015	Hakaluki wetland	Jaifornagar	Sylhet	Bangladesh	Chattogram Veterinary and Animal Sciences University	Anas platyrhynchos domesticus	Domestic duck	Healthy	Active surveillance	Undefined	Adult	Household	without chicken	135	5	Literate	real-time RT-PCR	Negative	cELISA	Positive
234	234	Blood, Oropharyngeal swab and cloacal swabs	2015	Hakaluki wetland	Jaifornagar	Sylhet	Bangladesh	Chattogram Veterinary and Animal Sciences University	Anas platyrhynchos domesticus	Domestic duck	Healthy	Active surveillance	Undefined	Adult	Household	without chicken	136	7	Literate	real-time RT-PCR	Negative	cELISA	Positive
235	235	Blood, Oropharyngeal swab and cloacal swabs	2015	Hakaluki wetland	Jaifornagar	Sylhet	Bangladesh	Chattogram Veterinary and Animal Sciences University	Anas platyrhynchos domesticus	Domestic duck	Healthy	Active surveillance	Undefined	Adult	Household	without chicken	137	10	Literate	real-time RT-PCR	Negative	cELISA	Positive
236	236	Blood, Oropharyngeal swab and cloacal swabs	2015	Hakaluki wetland	Jaifornagar	Sylhet	Bangladesh	Chattogram Veterinary and Animal Sciences University	Anas platyrhynchos domesticus	Domestic duck	Healthy	Active surveillance	Undefined	Adult	Household	without chicken	138	10	Literate	real-time RT-PCR	Negative	cELISA	Positive
237	237	Blood, Oropharyngeal swab and cloacal swabs	2015	Tanguar wetland	Dharmapasha	Sylhet	Bangladesh	Chattogram Veterinary and Animal Sciences University	Anas platyrhynchos domesticus	Domestic duck	Healthy	Active surveillance	Undefined	Adult	Household	with chicken	139	9	Illitarate	real-time RT-PCR	Negative	cELISA	Positive
238	238	Blood, Oropharyngeal swab and cloacal swabs	2015	Tanguar wetland	Dharmapasha	Sylhet	Bangladesh	Chattogram Veterinary and Animal Sciences University	Anas platyrhynchos domesticus	Domestic duck	Healthy	Active surveillance	Undefined	Adult	Household	with chicken	140	5	Illitarate	real-time RT-PCR	Negative	cELISA	Positive
239	239	Blood, Oropharyngeal swab and cloacal swabs	2015	Tanguar wetland	Dharmapasha	Sylhet	Bangladesh	Chattogram Veterinary and Animal Sciences University	Anas platyrhynchos domesticus	Domestic duck	Healthy	Active surveillance	Undefined	Adult	Household	with chicken	141	7	Illitarate	real-time RT-PCR	Negative	cELISA	Positive
240	240	Blood, Oropharyngeal swab and cloacal swabs	2015	Tanguar wetland	Dharmapasha	Sylhet	Bangladesh	Chattogram Veterinary and Animal Sciences University	Anas platyrhynchos domesticus	Domestic duck	Healthy	Active surveillance	Undefined	Adult	Household	with chicken	142	6	Illitarate	real-time RT-PCR	Negative	cELISA	Positive
241	241	Blood, Oropharyngeal swab and cloacal swabs	2015	Tanguar wetland	Dharmapasha	Sylhet	Bangladesh	Chattogram Veterinary and Animal Sciences University	Anas platyrhynchos domesticus	Domestic duck	Healthy	Active surveillance	Undefined	Adult	Household	with chicken	143	7	Illitarate	real-time RT-PCR	Negative	cELISA	Positive
242	242	Blood, Oropharyngeal swab and cloacal swabs	2015	Tanguar wetland	Dharmapasha	Sylhet	Bangladesh	Chattogram Veterinary and Animal Sciences University	Anas platyrhynchos domesticus	Domestic duck	Healthy	Active surveillance	Undefined	Adult	Household	with chicken	144	8	Illitarate	real-time RT-PCR	Negative	cELISA	Positive
243	243	Blood, Oropharyngeal swab and cloacal swabs	2015	Tanguar wetland	Dharmapasha	Sylhet	Bangladesh	Chattogram Veterinary and Animal Sciences University	Anas platyrhynchos domesticus	Domestic duck	Healthy	Active surveillance	Undefined	Adult	Household	with chicken	145	5	Illitarate	real-time RT-PCR	Negative	cELISA	Positive
244	244	Blood, Oropharyngeal swab and cloacal swabs	2015	Tanguar wetland	Dharmapasha	Sylhet	Bangladesh	Chattogram Veterinary and Animal Sciences University	Anas platyrhynchos domesticus	Domestic duck	Healthy	Active surveillance	Undefined	Adult	Household	with chicken	146	6	Illitarate	real-time RT-PCR	Negative	cELISA	Positive
245	245	Blood, Oropharyngeal swab and cloacal swabs	2015	Tanguar wetland	Dharmapasha	Sylhet	Bangladesh	Chattogram Veterinary and Animal Sciences University	Anas platyrhynchos domesticus	Domestic duck	Healthy	Active surveillance	Undefined	Adult	Household	with chicken	147	5	Illitarate	real-time RT-PCR	Negative	cELISA	Positive
246	246	Blood, Oropharyngeal swab and cloacal swabs	2015	Tanguar wetland	Dharmapasha	Sylhet	Bangladesh	Chattogram Veterinary and Animal Sciences University	Anas platyrhynchos domesticus	Domestic duck	Healthy	Active surveillance	Undefined	Adult	Household	with chicken	148	7	Illitarate	real-time RT-PCR	Negative	cELISA	Positive
247	247	Blood, Oropharyngeal swab and cloacal swabs	2015	Tanguar wetland	Dharmapasha	Sylhet	Bangladesh	Chattogram Veterinary and Animal Sciences University	Anas platyrhynchos domesticus	Domestic duck	Healthy	Active surveillance	Undefined	Adult	Household	with chicken	149	6	Illitarate	real-time RT-PCR	Negative	cELISA	Positive
248	248	Blood, Oropharyngeal swab and cloacal swabs	2015	Tanguar wetland	Tahirpur	Sylhet	Bangladesh	Chattogram Veterinary and Animal Sciences University	Anas platyrhynchos domesticus	Domestic duck	Healthy	Active surveillance	Undefined	Adult	Household	with chicken	150	7	Literate	real-time RT-PCR	Negative	cELISA	Positive
249	249	Blood, Oropharyngeal swab and cloacal swabs	2015	Tanguar wetland	Tahirpur	Sylhet	Bangladesh	Chattogram Veterinary and Animal Sciences University	Anas platyrhynchos domesticus	Domestic duck	Healthy	Active surveillance	Undefined	Adult	Household	without chicken	151	6	Literate	real-time RT-PCR	Negative	cELISA	Positive
250	250	Blood, Oropharyngeal swab and cloacal swabs	2015	Tanguar wetland	Tahirpur	Sylhet	Bangladesh	Chattogram Veterinary and Animal Sciences University	Anas platyrhynchos domesticus	Domestic duck	Healthy	Active surveillance	Undefined	Adult	Household	without chicken	152	8	Literate	real-time RT-PCR	Negative	cELISA	Positive
251	251	Blood, Oropharyngeal swab and cloacal swabs	2015	Tanguar wetland	Tahirpur	Sylhet	Bangladesh	Chattogram Veterinary and Animal Sciences University	Anas platyrhynchos domesticus	Domestic duck	Healthy	Active surveillance	Undefined	Adult	Household	without chicken	153	6	Literate	real-time RT-PCR	Negative	cELISA	Positive
252	252	Blood, Oropharyngeal swab and cloacal swabs	2015	Tanguar wetland	Tahirpur	Sylhet	Bangladesh	Chattogram Veterinary and Animal Sciences University	Anas platyrhynchos domesticus	Domestic duck	Healthy	Active surveillance	Undefined	Adult	Household	without chicken	154	5	Literate	real-time RT-PCR	Negative	cELISA	Positive
253	253	Blood, Oropharyngeal swab and cloacal swabs	2015	Tanguar wetland	Tahirpur	Sylhet	Bangladesh	Chattogram Veterinary and Animal Sciences University	Anas platyrhynchos domesticus	Domestic duck	Healthy	Active surveillance	Undefined	Adult	Household	with chicken	155	6	Illitarate	real-time RT-PCR	Negative	cELISA	Positive
254	254	Blood, Oropharyngeal swab and cloacal swabs	2015	Tanguar wetland	Tahirpur	Sylhet	Bangladesh	Chattogram Veterinary and Animal Sciences University	Anas platyrhynchos domesticus	Domestic duck	Healthy	Active surveillance	Undefined	Adult	Household	with chicken	156	7	Illitarate	real-time RT-PCR	Negative	cELISA	Positive
255	255	Blood, Oropharyngeal swab and cloacal swabs	2015	Tanguar wetland	Tahirpur	Sylhet	Bangladesh	Chattogram Veterinary and Animal Sciences University	Anas platyrhynchos domesticus	Domestic duck	Healthy	Active surveillance	Undefined	Adult	Household	with chicken	157	5	Illitarate	real-time RT-PCR	Negative	cELISA	Positive
256	256	Blood, Oropharyngeal swab and cloacal swabs	2015	Tanguar wetland	Tahirpur	Sylhet	Bangladesh	Chattogram Veterinary and Animal Sciences University	Anas platyrhynchos domesticus	Domestic duck	Healthy	Active surveillance	Undefined	Adult	Household	with chicken	158	7	Illitarate	real-time RT-PCR	Negative	cELISA	Positive
257	257	Blood, Oropharyngeal swab and cloacal swabs	2015	Tanguar wetland	Tahirpur	Sylhet	Bangladesh	Chattogram Veterinary and Animal Sciences University	Anas platyrhynchos domesticus	Domestic duck	Healthy	Active surveillance	Undefined	Adult	Household	with chicken	159	6	Illitarate	real-time RT-PCR	Negative	cELISA	Positive
258	258	Blood, Oropharyngeal swab and cloacal swabs	2015	Tanguar wetland	Tahirpur	Sylhet	Bangladesh	Chattogram Veterinary and Animal Sciences University	Anas platyrhynchos domesticus	Domestic duck	Healthy	Active surveillance	Undefined	Adult	Household	with chicken	160	9	Illitarate	real-time RT-PCR	Negative	cELISA	Positive
259	259	Blood, Oropharyngeal swab and cloacal swabs	2015	Tanguar wetland	Tahirpur	Sylhet	Bangladesh	Chattogram Veterinary and Animal Sciences University	Anas platyrhynchos domesticus	Domestic duck	Healthy	Active surveillance	Undefined	Adult	Household	with chicken	161	7	Illitarate	real-time RT-PCR	Negative	cELISA	Positive
260	260	Blood, Oropharyngeal swab and cloacal swabs	2015	Tanguar wetland	Tahirpur	Sylhet	Bangladesh	Chattogram Veterinary and Animal Sciences University	Anas platyrhynchos domesticus	Domestic duck	Healthy	Active surveillance	Undefined	Adult	Household	with chicken	162	5	Literate	real-time RT-PCR	Negative	cELISA	Positive
261	261	Blood, Oropharyngeal swab and cloacal swabs	2015	Tanguar wetland	Tahirpur	Sylhet	Bangladesh	Chattogram Veterinary and Animal Sciences University	Anas platyrhynchos domesticus	Domestic duck	Healthy	Active surveillance	Undefined	Adult	Household	with chicken	163	8	Literate	real-time RT-PCR	Negative	cELISA	Positive
262	262	Blood, Oropharyngeal swab and cloacal swabs	2015	Tanguar wetland	Tahirpur	Sylhet	Bangladesh	Chattogram Veterinary and Animal Sciences University	Anas platyrhynchos domesticus	Domestic duck	Healthy	Active surveillance	Undefined	Adult	Household	with chicken	164	9	Literate	real-time RT-PCR	Negative	cELISA	Positive
263	263	Blood, Oropharyngeal swab and cloacal swabs	2015	Tanguar wetland	Tahirpur	Sylhet	Bangladesh	Chattogram Veterinary and Animal Sciences University	Anas platyrhynchos domesticus	Domestic duck	Healthy	Active surveillance	Undefined	Adult	Household	without chicken	165	6	Literate	real-time RT-PCR	Negative	cELISA	Positive
264	264	Blood, Oropharyngeal swab and cloacal swabs	2015	Tanguar wetland	Tahirpur	Sylhet	Bangladesh	Chattogram Veterinary and Animal Sciences University	Anas platyrhynchos domesticus	Domestic duck	Healthy	Active surveillance	Undefined	Adult	Household	without chicken	166	10	Literate	real-time RT-PCR	Negative	cELISA	Positive
265	265	Blood, Oropharyngeal swab and cloacal swabs	2015	Tanguar wetland	Tahirpur	Sylhet	Bangladesh	Chattogram Veterinary and Animal Sciences University	Anas platyrhynchos domesticus	Domestic duck	Healthy	Active surveillance	Undefined	Adult	Household	without chicken	167	9	Literate	real-time RT-PCR	Negative	cELISA	Positive
266	266	Blood, Oropharyngeal swab and cloacal swabs	2015	Tanguar wetland	Tahirpur	Sylhet	Bangladesh	Chattogram Veterinary and Animal Sciences University	Anas platyrhynchos domesticus	Domestic duck	Healthy	Active surveillance	Undefined	Adult	Household	without chicken	168	7	Literate	real-time RT-PCR	Negative	cELISA	Positive
267	267	Blood, Oropharyngeal swab and cloacal swabs	2015	Tanguar wetland	Tahirpur	Sylhet	Bangladesh	Chattogram Veterinary and Animal Sciences University	Anas platyrhynchos domesticus	Domestic duck	Healthy	Active surveillance	Undefined	Adult	Household	without chicken	169	5	Literate	real-time RT-PCR	Negative	cELISA	Positive
268	268	Blood, Oropharyngeal swab and cloacal swabs	2015	Tanguar wetland	Tahirpur	Sylhet	Bangladesh	Chattogram Veterinary and Animal Sciences University	Anas platyrhynchos domesticus	Domestic duck	Healthy	Active surveillance	Undefined	Adult	Household	without chicken	170	8	Literate	real-time RT-PCR	Negative	cELISA	Negative
269	269	Blood, Oropharyngeal swab and cloacal swabs	2015	Tanguar wetland	Tahirpur	Sylhet	Bangladesh	Chattogram Veterinary and Animal Sciences University	Anas platyrhynchos domesticus	Domestic duck	Healthy	Active surveillance	Undefined	Adult	Household	without chicken	171	8	Literate	real-time RT-PCR	Negative	cELISA	Positive
270	270	Blood, Oropharyngeal swab and cloacal swabs	2015	Tanguar wetland	Barhatta	Sylhet	Bangladesh	Chattogram Veterinary and Animal Sciences University	Anas platyrhynchos domesticus	Domestic duck	Healthy	Active surveillance	Undefined	Adult	Household	without chicken	172	9	Literate	real-time RT-PCR	Negative	cELISA	Positive
271	271	Blood, Oropharyngeal swab and cloacal swabs	2015	Tanguar wetland	Barhatta	Sylhet	Bangladesh	Chattogram Veterinary and Animal Sciences University	Anas platyrhynchos domesticus	Domestic duck	Healthy	Active surveillance	Undefined	Adult	Household	without chicken	173	8	Literate	real-time RT-PCR	Negative	cELISA	Positive
272	272	Blood, Oropharyngeal swab and cloacal swabs	2015	Tanguar wetland	Barhatta	Sylhet	Bangladesh	Chattogram Veterinary and Animal Sciences University	Anas platyrhynchos domesticus	Domestic duck	Healthy	Active surveillance	Undefined	Adult	Household	without chicken	174	5	Literate	real-time RT-PCR	Negative	cELISA	Positive
273	273	Blood, Oropharyngeal swab and cloacal swabs	2015	Tanguar wetland	Barhatta	Sylhet	Bangladesh	Chattogram Veterinary and Animal Sciences University	Anas platyrhynchos domesticus	Domestic duck	Healthy	Active surveillance	Undefined	Adult	Household	without chicken	175	7	Literate	real-time RT-PCR	Negative	cELISA	Negative
274	274	Blood, Oropharyngeal swab and cloacal swabs	2015	Tanguar wetland	Barhatta	Sylhet	Bangladesh	Chattogram Veterinary and Animal Sciences University	Anas platyrhynchos domesticus	Domestic duck	Healthy	Active surveillance	Undefined	Adult	Household	without chicken	176	5	Literate	real-time RT-PCR	Negative	cELISA	Positive
275	275	Blood, Oropharyngeal swab and cloacal swabs	2015	Tanguar wetland	Barhatta	Sylhet	Bangladesh	Chattogram Veterinary and Animal Sciences University	Anas platyrhynchos domesticus	Domestic duck	Healthy	Active surveillance	Undefined	Adult	Household	without chicken	177	5	Literate	real-time RT-PCR	Negative	cELISA	Negative
276	276	Blood, Oropharyngeal swab and cloacal swabs	2015	Tanguar wetland	Barhatta	Sylhet	Bangladesh	Chattogram Veterinary and Animal Sciences University	Anas platyrhynchos domesticus	Domestic duck	Healthy	Active surveillance	Undefined	Adult	Household	without chicken	178	6	Literate	real-time RT-PCR	Negative	cELISA	Negative
277	277	Blood, Oropharyngeal swab and cloacal swabs	2015	Tanguar wetland	Barhatta	Sylhet	Bangladesh	Chattogram Veterinary and Animal Sciences University	Anas platyrhynchos domesticus	Domestic duck	Healthy	Active surveillance	Undefined	Adult	Household	without chicken	179	10	Literate	real-time RT-PCR	Negative	cELISA	Negative
278	278	Blood, Oropharyngeal swab and cloacal swabs	2015	Tanguar wetland	Barhatta	Sylhet	Bangladesh	Chattogram Veterinary and Animal Sciences University	Anas platyrhynchos domesticus	Domestic duck	Healthy	Active surveillance	Undefined	Adult	Household	with chicken	180	5	Literate	real-time RT-PCR	Negative	cELISA	Negative
279	279	Blood, Oropharyngeal swab and cloacal swabs	2015	Tanguar wetland	Barhatta	Sylhet	Bangladesh	Chattogram Veterinary and Animal Sciences University	Anas platyrhynchos domesticus	Domestic duck	Healthy	Active surveillance	Undefined	Adult	Household	with chicken	181	9	Literate	real-time RT-PCR	Negative	cELISA	Negative
280	280	Blood, Oropharyngeal swab and cloacal swabs	2015	Tanguar wetland	Barhatta	Sylhet	Bangladesh	Chattogram Veterinary and Animal Sciences University	Anas platyrhynchos domesticus	Domestic duck	Healthy	Active surveillance	Undefined	Adult	Household	with chicken	182	8	Literate	real-time RT-PCR	Negative	cELISA	Positive
281	281	Blood, Oropharyngeal swab and cloacal swabs	2015	Tanguar wetland	Barhatta	Sylhet	Bangladesh	Chattogram Veterinary and Animal Sciences University	Anas platyrhynchos domesticus	Domestic duck	Healthy	Active surveillance	Undefined	Adult	Household	with chicken	183	6	Literate	real-time RT-PCR	Negative	cELISA	Positive
282	282	Blood, Oropharyngeal swab and cloacal swabs	2015	Tanguar wetland	Barhatta	Sylhet	Bangladesh	Chattogram Veterinary and Animal Sciences University	Anas platyrhynchos domesticus	Domestic duck	Healthy	Active surveillance	Undefined	Adult	Household	with chicken	184	7	Literate	real-time RT-PCR	Negative	cELISA	Positive
283	283	Blood, Oropharyngeal swab and cloacal swabs	2015	Tanguar wetland	Barhatta	Sylhet	Bangladesh	Chattogram Veterinary and Animal Sciences University	Anas platyrhynchos domesticus	Domestic duck	Healthy	Active surveillance	Undefined	Adult	Household	with chicken	185	6	Literate	real-time RT-PCR	Negative	cELISA	Positive
284	284	Blood, Oropharyngeal swab and cloacal swabs	2015	Hakaluki wetland	Jaifornagar	Sylhet	Bangladesh	Chattogram Veterinary and Animal Sciences University	Anas platyrhynchos domesticus	Domestic duck	Healthy	Active surveillance	Undefined	Adult	Household	with chicken	186	5	Literate	real-time RT-PCR	Positive	cELISA	Negative
285	285	Blood, Oropharyngeal swab and cloacal swabs	2015	Hakaluki wetland	Jaifornagar	Sylhet	Bangladesh	Chattogram Veterinary and Animal Sciences University	Anas platyrhynchos domesticus	Domestic duck	Healthy	Active surveillance	Undefined	Adult	Household	with chicken	187	7	Literate	real-time RT-PCR	Positive	cELISA	Positive
286	286	Blood, Oropharyngeal swab and cloacal swabs	2015	Hakaluki wetland	Jaifornagar	Sylhet	Bangladesh	Chattogram Veterinary and Animal Sciences University	Anas platyrhynchos domesticus	Domestic duck	Healthy	Active surveillance	Undefined	Adult	Household	with chicken	188	6	Literate	real-time RT-PCR	Positive	cELISA	Negative
287	287	Blood, Oropharyngeal swab and cloacal swabs	2015	Hakaluki wetland	Jaifornagar	Sylhet	Bangladesh	Chattogram Veterinary and Animal Sciences University	Anas platyrhynchos domesticus	Domestic duck	Healthy	Active surveillance	Undefined	Adult	Household	without chicken	189	8	Literate	real-time RT-PCR	Negative	cELISA	Negative
288	288	Blood, Oropharyngeal swab and cloacal swabs	2015	Hakaluki wetland	Jaifornagar	Sylhet	Bangladesh	Chattogram Veterinary and Animal Sciences University	Anas platyrhynchos domesticus	Domestic duck	Healthy	Active surveillance	Undefined	Adult	Household	with chicken	190	9	Literate	real-time RT-PCR	Positive	cELISA	Positive
289	289	Blood, Oropharyngeal swab and cloacal swabs	2015	Hakaluki wetland	Jaifornagar	Sylhet	Bangladesh	Chattogram Veterinary and Animal Sciences University	Anas platyrhynchos domesticus	Domestic duck	Healthy	Active surveillance	Undefined	Adult	Household	with chicken	191	5	Literate	real-time RT-PCR	Positive	cELISA	Negative
290	290	Blood, Oropharyngeal swab and cloacal swabs	2015	Hakaluki wetland	Jaifornagar	Sylhet	Bangladesh	Chattogram Veterinary and Animal Sciences University	Anas platyrhynchos domesticus	Domestic duck	Healthy	Active surveillance	Undefined	Adult	Household	with chicken	192	8	Literate	real-time RT-PCR	Positive	cELISA	Negative
291	291	Blood, Oropharyngeal swab and cloacal swabs	2015	Hakaluki wetland	Jaifornagar	Sylhet	Bangladesh	Chattogram Veterinary and Animal Sciences University	Anas platyrhynchos domesticus	Domestic duck	Healthy	Active surveillance	Undefined	Adult	Household	with chicken	193	5	Literate	real-time RT-PCR	Positive	cELISA	Negative
292	292	Blood, Oropharyngeal swab and cloacal swabs	2015	Hakaluki wetland	Jaifornagar	Sylhet	Bangladesh	Chattogram Veterinary and Animal Sciences University	Anas platyrhynchos domesticus	Domestic duck	Healthy	Active surveillance	Undefined	Adult	Household	with chicken	194	9	Literate	real-time RT-PCR	Positive	cELISA	Negative
293	293	Blood, Oropharyngeal swab and cloacal swabs	2015	Tanguar wetland	Dharmapasha	Sylhet	Bangladesh	Chattogram Veterinary and Animal Sciences University	Anas platyrhynchos domesticus	Domestic duck	Healthy	Active surveillance	Undefined	Adult	Free-range domestic	waterfowl	20	760	Illitarate	real-time RT-PCR	Positive	cELISA	Positive
294	294	Blood, Oropharyngeal swab and cloacal swabs	2015	Tanguar wetland	Dharmapasha	Sylhet	Bangladesh	Chattogram Veterinary and Animal Sciences University	Anas platyrhynchos domesticus	Domestic duck	Healthy	Active surveillance	Undefined	Adult	Free-range domestic	waterfowl	20	760	Illitarate	real-time RT-PCR	Positive	cELISA	Positive
295	295	Blood, Oropharyngeal swab and cloacal swabs	2015	Tanguar wetland	Tahirpur	Sylhet	Bangladesh	Chattogram Veterinary and Animal Sciences University	Anas platyrhynchos domesticus	Domestic duck	Healthy	Active surveillance	Undefined	Adult	Free-range domestic	waterfowl	21	300	Illitarate	real-time RT-PCR	Positive	cELISA	Positive
296	296	Blood, Oropharyngeal swab and cloacal swabs	2015	Tanguar wetland	Tahirpur	Sylhet	Bangladesh	Chattogram Veterinary and Animal Sciences University	Anas platyrhynchos domesticus	Domestic duck	Healthy	Active surveillance	Undefined	Adult	Free-range domestic	waterfowl	21	300	Illitarate	real-time RT-PCR	Positive	cELISA	Negative
297	297	Blood, Oropharyngeal swab and cloacal swabs	2015	Tanguar wetland	Tahirpur	Sylhet	Bangladesh	Chattogram Veterinary and Animal Sciences University	Anas platyrhynchos domesticus	Domestic duck	Healthy	Active surveillance	Undefined	Adult	Free-range domestic	waterfowl	21	300	Illitarate	real-time RT-PCR	Positive	cELISA	Negative
298	298	Blood, Oropharyngeal swab and cloacal swabs	2015	Tanguar wetland	Tahirpur	Sylhet	Bangladesh	Chattogram Veterinary and Animal Sciences University	Anas platyrhynchos domesticus	Domestic duck	Healthy	Active surveillance	Undefined	Adult	Free-range domestic	waterfowl	21	300	Illitarate	real-time RT-PCR	Positive	cELISA	Negative
299	299	Blood, Oropharyngeal swab and cloacal swabs	2015	Tanguar wetland	Tahirpur	Sylhet	Bangladesh	Chattogram Veterinary and Animal Sciences University	Anas platyrhynchos domesticus	Domestic duck	Healthy	Active surveillance	Undefined	Adult	Free-range domestic	waterfowl	21	300	Illitarate	real-time RT-PCR	Positive	cELISA	Positive
300	300	Blood, Oropharyngeal swab and cloacal swabs	2015	Tanguar wetland	Tahirpur	Sylhet	Bangladesh	Chattogram Veterinary and Animal Sciences University	Anas platyrhynchos domesticus	Domestic duck	Healthy	Active surveillance	Undefined	Adult	Household	with chicken	195	10	Literate	real-time RT-PCR	Positive	cELISA	Positive
301	301	Blood, Oropharyngeal swab and cloacal swabs	2015	Tanguar wetland	Tahirpur	Sylhet	Bangladesh	Chattogram Veterinary and Animal Sciences University	Anas platyrhynchos domesticus	Domestic duck	Healthy	Active surveillance	Undefined	Adult	Household	with chicken	196	5	Literate	real-time RT-PCR	Positive	cELISA	Positive
302	302	Blood, Oropharyngeal swab and cloacal swabs	2015	Tanguar wetland	Tahirpur	Sylhet	Bangladesh	Chattogram Veterinary and Animal Sciences University	Anas platyrhynchos domesticus	Domestic duck	Healthy	Active surveillance	Undefined	Adult	Household	with chicken	197	7	Illitarate	real-time RT-PCR	Positive	cELISA	Positive
303	303	Blood, Oropharyngeal swab and cloacal swabs	2015	Tanguar wetland	Tahirpur	Sylhet	Bangladesh	Chattogram Veterinary and Animal Sciences University	Anas platyrhynchos domesticus	Domestic duck	Healthy	Active surveillance	Undefined	Adult	Household	with chicken	198	6	Literate	real-time RT-PCR	Positive	cELISA	Positive
304	304	Blood, Oropharyngeal swab and cloacal swabs	2015	Tanguar wetland	Tahirpur	Sylhet	Bangladesh	Chattogram Veterinary and Animal Sciences University	Anas platyrhynchos domesticus	Domestic duck	Healthy	Active surveillance	Undefined	Adult	Household	with chicken	199	9	Literate	real-time RT-PCR	Positive	cELISA	Positive
305	305	Blood, Oropharyngeal swab and cloacal swabs	2015	Hakaluki wetland	Jaifornagar	Sylhet	Bangladesh	Chattogram Veterinary and Animal Sciences University	Anas platyrhynchos domesticus	Domestic duck	Healthy	Active surveillance	Undefined	Adult	Household	with chicken	200	5	Literate	real-time RT-PCR	Positive	cELISA	Negative
306	306	Blood, Oropharyngeal swab and cloacal swabs	2015	Hakaluki wetland	Jaifornagar	Sylhet	Bangladesh	Chattogram Veterinary and Animal Sciences University	Anas platyrhynchos domesticus	Domestic duck	Healthy	Active surveillance	Undefined	Adult	Household	with chicken	201	8	Literate	real-time RT-PCR	Positive	cELISA	Positive
307	307	Blood, Oropharyngeal swab and cloacal swabs	2015	Hakaluki wetland	Jaifornagar	Sylhet	Bangladesh	Chattogram Veterinary and Animal Sciences University	Anas platyrhynchos domesticus	Domestic duck	Healthy	Active surveillance	Undefined	Adult	Household	with chicken	202	9	Literate	real-time RT-PCR	Positive	cELISA	Negative
308	308	Blood, Oropharyngeal swab and cloacal swabs	2015	Hakaluki wetland	Jaifornagar	Sylhet	Bangladesh	Chattogram Veterinary and Animal Sciences University	Anas platyrhynchos domesticus	Domestic duck	Healthy	Active surveillance	Undefined	Adult	Household	with chicken	203	7	Literate	real-time RT-PCR	Positive	cELISA	Positive
309	309	Blood, Oropharyngeal swab and cloacal swabs	2015	Hakaluki wetland	Jaifornagar	Sylhet	Bangladesh	Chattogram Veterinary and Animal Sciences University	Anas platyrhynchos domesticus	Domestic duck	Healthy	Active surveillance	Undefined	Adult	Household	with chicken	204	9	Literate	real-time RT-PCR	Positive	cELISA	Negative
310	310	Blood, Oropharyngeal swab and cloacal swabs	2015	Hakaluki wetland	Jaifornagar	Sylhet	Bangladesh	Chattogram Veterinary and Animal Sciences University	Anas platyrhynchos domesticus	Domestic duck	Healthy	Active surveillance	Undefined	Adult	Household	with chicken	205	7	Literate	real-time RT-PCR	Positive	cELISA	Negative
311	311	Blood, Oropharyngeal swab and cloacal swabs	2015	Tanguar wetland	Tahirpur	Sylhet	Bangladesh	Chattogram Veterinary and Animal Sciences University	Anas platyrhynchos domesticus	Domestic duck	Healthy	Active surveillance	Undefined	Adult	Household	with chicken	206	8	Illitarate	real-time RT-PCR	Positive	cELISA	Positive
312	312	Blood, Oropharyngeal swab and cloacal swabs	2015	Tanguar wetland	Tahirpur	Sylhet	Bangladesh	Chattogram Veterinary and Animal Sciences University	Anas platyrhynchos domesticus	Domestic duck	Healthy	Active surveillance	Undefined	Adult	Household	with chicken	207	6	Illitarate	real-time RT-PCR	Positive	cELISA	Positive
313	313	Blood, Oropharyngeal swab and cloacal swabs	2015	Tanguar wetland	Tahirpur	Sylhet	Bangladesh	Chattogram Veterinary and Animal Sciences University	Anas platyrhynchos domesticus	Domestic duck	Healthy	Active surveillance	Undefined	Adult	Household	with chicken	208	5	Literate	real-time RT-PCR	Positive	cELISA	Positive
314	314	Blood, Oropharyngeal swab and cloacal swabs	2015	Tanguar wetland	Tahirpur	Sylhet	Bangladesh	Chattogram Veterinary and Animal Sciences University	Anas platyrhynchos domesticus	Domestic duck	Healthy	Active surveillance	Undefined	Adult	Household	with chicken	209	5	Literate	real-time RT-PCR	Positive	cELISA	Positive
315	315	Blood, Oropharyngeal swab and cloacal swabs	2015	Tanguar wetland	Tahirpur	Sylhet	Bangladesh	Chattogram Veterinary and Animal Sciences University	Anas platyrhynchos domesticus	Domestic duck	Healthy	Active surveillance	Undefined	Adult	Household	with chicken	210	8	Literate	real-time RT-PCR	Positive	cELISA	Positive
316	316	Blood, Oropharyngeal swab and cloacal swabs	2015	Tanguar wetland	Tahirpur	Sylhet	Bangladesh	Chattogram Veterinary and Animal Sciences University	Anas platyrhynchos domesticus	Domestic duck	Healthy	Active surveillance	Undefined	Adult	Household	with chicken	211	9	Literate	real-time RT-PCR	Positive	cELISA	Positive
317	317	Blood, Oropharyngeal swab and cloacal swabs	2016	Hakaluki wetland	Barlekha	Sylhet	Bangladesh	Chattogram Veterinary and Animal Sciences University	Anas platyrhynchos domesticus	Domestic duck	Healthy	Active surveillance	Undefined	Adult	Free-range domestic	waterfowl	1	325	Literate	real-time RT-PCR	Negative	cELISA	Positive
318	318	Blood, Oropharyngeal swab and cloacal swabs	2016	Hakaluki wetland	Barlekha	Sylhet	Bangladesh	Chattogram Veterinary and Animal Sciences University	Anas platyrhynchos domesticus	Domestic duck	Healthy	Active surveillance	Undefined	Adult	Free-range domestic	waterfowl	1	325	Literate	real-time RT-PCR	Negative	cELISA	Positive
319	319	Blood, Oropharyngeal swab and cloacal swabs	2016	Hakaluki wetland	Barlekha	Sylhet	Bangladesh	Chattogram Veterinary and Animal Sciences University	Anas platyrhynchos domesticus	Domestic duck	Healthy	Active surveillance	Undefined	Adult	Free-range domestic	waterfowl	1	325	Literate	real-time RT-PCR	Negative	cELISA	Positive
320	320	Blood, Oropharyngeal swab and cloacal swabs	2016	Hakaluki wetland	Barlekha	Sylhet	Bangladesh	Chattogram Veterinary and Animal Sciences University	Anas platyrhynchos domesticus	Domestic duck	Healthy	Active surveillance	Undefined	Adult	Free-range domestic	waterfowl	1	325	Literate	real-time RT-PCR	Negative	cELISA	Positive
321	321	Blood, Oropharyngeal swab and cloacal swabs	2016	Hakaluki wetland	Barlekha	Sylhet	Bangladesh	Chattogram Veterinary and Animal Sciences University	Anas platyrhynchos domesticus	Domestic duck	Healthy	Active surveillance	Undefined	Adult	Free-range domestic	waterfowl	1	325	Literate	real-time RT-PCR	Negative	cELISA	Positive
322	322	Blood, Oropharyngeal swab and cloacal swabs	2016	Hakaluki wetland	Barlekha	Sylhet	Bangladesh	Chattogram Veterinary and Animal Sciences University	Anas platyrhynchos domesticus	Domestic duck	Healthy	Active surveillance	Undefined	Adult	Free-range domestic	waterfowl	2	460	Literate	real-time RT-PCR	Negative	cELISA	Negative
323	323	Blood, Oropharyngeal swab and cloacal swabs	2016	Hakaluki wetland	Barlekha	Sylhet	Bangladesh	Chattogram Veterinary and Animal Sciences University	Anas platyrhynchos domesticus	Domestic duck	Healthy	Active surveillance	Undefined	Adult	Free-range domestic	waterfowl	2	460	Illitarate	real-time RT-PCR	Negative	cELISA	Positive
324	324	Blood, Oropharyngeal swab and cloacal swabs	2016	Hakaluki wetland	Barlekha	Sylhet	Bangladesh	Chattogram Veterinary and Animal Sciences University	Anas platyrhynchos domesticus	Domestic duck	Healthy	Active surveillance	Undefined	Adult	Free-range domestic	waterfowl	2	460	Illitarate	real-time RT-PCR	Negative	cELISA	Positive
325	325	Blood, Oropharyngeal swab and cloacal swabs	2016	Hakaluki wetland	Barlekha	Sylhet	Bangladesh	Chattogram Veterinary and Animal Sciences University	Anas platyrhynchos domesticus	Domestic duck	Healthy	Active surveillance	Undefined	Adult	Free-range domestic	waterfowl	2	460	Illitarate	real-time RT-PCR	Negative	cELISA	Positive
326	326	Blood, Oropharyngeal swab and cloacal swabs	2016	Hakaluki wetland	Barlekha	Sylhet	Bangladesh	Chattogram Veterinary and Animal Sciences University	Anas platyrhynchos domesticus	Domestic duck	Healthy	Active surveillance	Undefined	Adult	Free-range domestic	waterfowl	2	460	Illitarate	real-time RT-PCR	Negative	cELISA	Positive
327	327	Blood, Oropharyngeal swab and cloacal swabs	2016	Hakaluki wetland	Barlekha	Sylhet	Bangladesh	Chattogram Veterinary and Animal Sciences University	Anas platyrhynchos domesticus	Domestic duck	Healthy	Active surveillance	Undefined	Adult	Free-range domestic	waterfowl	3	340	Illitarate	real-time RT-PCR	Negative	cELISA	Negative
328	328	Blood, Oropharyngeal swab and cloacal swabs	2016	Hakaluki wetland	Barlekha	Sylhet	Bangladesh	Chattogram Veterinary and Animal Sciences University	Anas platyrhynchos domesticus	Domestic duck	Healthy	Active surveillance	Undefined	Adult	Free-range domestic	waterfowl	3	340	Illitarate	real-time RT-PCR	Negative	cELISA	Positive
329	329	Blood, Oropharyngeal swab and cloacal swabs	2016	Hakaluki wetland	Barlekha	Sylhet	Bangladesh	Chattogram Veterinary and Animal Sciences University	Anas platyrhynchos domesticus	Domestic duck	Healthy	Active surveillance	Undefined	Adult	Free-range domestic	waterfowl	3	340	Illitarate	real-time RT-PCR	Negative	cELISA	Positive
330	330	Blood, Oropharyngeal swab and cloacal swabs	2016	Hakaluki wetland	Barlekha	Sylhet	Bangladesh	Chattogram Veterinary and Animal Sciences University	Anas platyrhynchos domesticus	Domestic duck	Healthy	Active surveillance	Undefined	Adult	Free-range domestic	waterfowl	3	340	Illitarate	real-time RT-PCR	Negative	cELISA	Negative
331	331	Blood, Oropharyngeal swab and cloacal swabs	2016	Hakaluki wetland	Barlekha	Sylhet	Bangladesh	Chattogram Veterinary and Animal Sciences University	Anas platyrhynchos domesticus	Domestic duck	Healthy	Active surveillance	Undefined	Adult	Free-range domestic	waterfowl	3	340	Illitarate	real-time RT-PCR	Negative	cELISA	Negative
332	332	Blood, Oropharyngeal swab and cloacal swabs	2016	Hakaluki wetland	Barlekha	Sylhet	Bangladesh	Chattogram Veterinary and Animal Sciences University	Anas platyrhynchos domesticus	Domestic duck	Healthy	Active surveillance	Undefined	Adult	Free-range domestic	waterfowl	4	322	Literate	real-time RT-PCR	Negative	cELISA	Positive
333	333	Blood, Oropharyngeal swab and cloacal swabs	2016	Hakaluki wetland	Barlekha	Sylhet	Bangladesh	Chattogram Veterinary and Animal Sciences University	Anas platyrhynchos domesticus	Domestic duck	Healthy	Active surveillance	Undefined	Adult	Free-range domestic	waterfowl	4	322	Literate	real-time RT-PCR	Negative	cELISA	Positive
334	334	Blood, Oropharyngeal swab and cloacal swabs	2016	Hakaluki wetland	Barlekha	Sylhet	Bangladesh	Chattogram Veterinary and Animal Sciences University	Anas platyrhynchos domesticus	Domestic duck	Healthy	Active surveillance	Undefined	Adult	Free-range domestic	waterfowl	4	322	Literate	real-time RT-PCR	Negative	cELISA	Negative
335	335	Blood, Oropharyngeal swab and cloacal swabs	2016	Hakaluki wetland	Barlekha	Sylhet	Bangladesh	Chattogram Veterinary and Animal Sciences University	Anas platyrhynchos domesticus	Domestic duck	Healthy	Active surveillance	Undefined	Adult	Household	without chicken	1	6	Illitarate	real-time RT-PCR	Negative	cELISA	Positive
336	336	Blood, Oropharyngeal swab and cloacal swabs	2016	Hakaluki wetland	Barlekha	Sylhet	Bangladesh	Chattogram Veterinary and Animal Sciences University	Anas platyrhynchos domesticus	Domestic duck	Healthy	Active surveillance	Undefined	Adult	Household	without chicken	2	7	Illitarate	real-time RT-PCR	Negative	cELISA	Negative
337	337	Blood, Oropharyngeal swab and cloacal swabs	2016	Hakaluki wetland	Barlekha	Sylhet	Bangladesh	Chattogram Veterinary and Animal Sciences University	Anas platyrhynchos domesticus	Domestic duck	Healthy	Active surveillance	Undefined	Adult	Household	without chicken	3	9	Illitarate	real-time RT-PCR	Negative	cELISA	Negative
338	338	Blood, Oropharyngeal swab and cloacal swabs	2016	Hakaluki wetland	Barlekha	Sylhet	Bangladesh	Chattogram Veterinary and Animal Sciences University	Anas platyrhynchos domesticus	Domestic duck	Healthy	Active surveillance	Undefined	Adult	Household	without chicken	4	5	Illitarate	real-time RT-PCR	Negative	cELISA	Negative
339	339	Blood, Oropharyngeal swab and cloacal swabs	2016	Hakaluki wetland	Barlekha	Sylhet	Bangladesh	Chattogram Veterinary and Animal Sciences University	Anas platyrhynchos domesticus	Domestic duck	Healthy	Active surveillance	Undefined	Adult	Household	without chicken	5	7	Illitarate	real-time RT-PCR	Negative	cELISA	Positive
340	340	Blood, Oropharyngeal swab and cloacal swabs	2016	Hakaluki wetland	Barlekha	Sylhet	Bangladesh	Chattogram Veterinary and Animal Sciences University	Anas platyrhynchos domesticus	Domestic duck	Healthy	Active surveillance	Undefined	Adult	Household	without chicken	6	8	Literate	real-time RT-PCR	Negative	cELISA	Positive
341	341	Blood, Oropharyngeal swab and cloacal swabs	2016	Hakaluki wetland	Barlekha	Sylhet	Bangladesh	Chattogram Veterinary and Animal Sciences University	Anas platyrhynchos domesticus	Domestic duck	Healthy	Active surveillance	Undefined	Adult	Household	without chicken	7	6	Literate	real-time RT-PCR	Negative	cELISA	Negative
342	342	Blood, Oropharyngeal swab and cloacal swabs	2016	Hakaluki wetland	Barlekha	Sylhet	Bangladesh	Chattogram Veterinary and Animal Sciences University	Anas platyrhynchos domesticus	Domestic duck	Healthy	Active surveillance	Undefined	Adult	Household	without chicken	8	9	Illitarate	real-time RT-PCR	Negative	cELISA	Negative
343	343	Blood, Oropharyngeal swab and cloacal swabs	2016	Hakaluki wetland	Barlekha	Sylhet	Bangladesh	Chattogram Veterinary and Animal Sciences University	Anas platyrhynchos domesticus	Domestic duck	Healthy	Active surveillance	Undefined	Adult	Household	with chicken	9	9	Illitarate	real-time RT-PCR	Negative	cELISA	Positive
344	344	Blood, Oropharyngeal swab and cloacal swabs	2016	Hakaluki wetland	Barlekha	Sylhet	Bangladesh	Chattogram Veterinary and Animal Sciences University	Anas platyrhynchos domesticus	Domestic duck	Healthy	Active surveillance	Undefined	Adult	Household	with chicken	10	10	Illitarate	real-time RT-PCR	Negative	cELISA	Positive
345	345	Blood, Oropharyngeal swab and cloacal swabs	2016	Hakaluki wetland	Barlekha	Sylhet	Bangladesh	Chattogram Veterinary and Animal Sciences University	Anas platyrhynchos domesticus	Domestic duck	Healthy	Active surveillance	Undefined	Adult	Household	with chicken	11	5	Illitarate	real-time RT-PCR	Negative	cELISA	Positive
346	346	Blood, Oropharyngeal swab and cloacal swabs	2016	Hakaluki wetland	Barlekha	Sylhet	Bangladesh	Chattogram Veterinary and Animal Sciences University	Anas platyrhynchos domesticus	Domestic duck	Healthy	Active surveillance	Undefined	Adult	Household	with chicken	12	5	Illitarate	real-time RT-PCR	Negative	cELISA	Positive
347	347	Blood, Oropharyngeal swab and cloacal swabs	2016	Hakaluki wetland	Barlekha	Sylhet	Bangladesh	Chattogram Veterinary and Animal Sciences University	Anas platyrhynchos domesticus	Domestic duck	Healthy	Active surveillance	Undefined	Adult	Household	with chicken	13	7	Illitarate	real-time RT-PCR	Negative	cELISA	Positive
348	348	Blood, Oropharyngeal swab and cloacal swabs	2016	Hakaluki wetland	Barlekha	Sylhet	Bangladesh	Chattogram Veterinary and Animal Sciences University	Anas platyrhynchos domesticus	Domestic duck	Healthy	Active surveillance	Undefined	Adult	Household	with chicken	14	6	Illitarate	real-time RT-PCR	Negative	cELISA	Negative
349	349	Blood, Oropharyngeal swab and cloacal swabs	2016	Hakaluki wetland	Barlekha	Sylhet	Bangladesh	Chattogram Veterinary and Animal Sciences University	Anas platyrhynchos domesticus	Domestic duck	Healthy	Active surveillance	Undefined	Adult	Household	without chicken	15	8	Literate	real-time RT-PCR	Negative	cELISA	Negative
350	350	Blood, Oropharyngeal swab and cloacal swabs	2016	Hakaluki wetland	Barlekha	Sylhet	Bangladesh	Chattogram Veterinary and Animal Sciences University	Anas platyrhynchos domesticus	Domestic duck	Healthy	Active surveillance	Undefined	Adult	Household	without chicken	16	5	Literate	real-time RT-PCR	Negative	cELISA	Negative
351	351	Blood, Oropharyngeal swab and cloacal swabs	2016	Hakaluki wetland	Barlekha	Sylhet	Bangladesh	Chattogram Veterinary and Animal Sciences University	Anas platyrhynchos domesticus	Domestic duck	Healthy	Active surveillance	Undefined	Adult	Household	with chicken	17	9	Illitarate	real-time RT-PCR	Negative	cELISA	Positive
352	352	Blood, Oropharyngeal swab and cloacal swabs	2016	Hakaluki wetland	Barlekha	Sylhet	Bangladesh	Chattogram Veterinary and Animal Sciences University	Anas platyrhynchos domesticus	Domestic duck	Healthy	Active surveillance	Undefined	Adult	Household	without chicken	18	5	Illitarate	real-time RT-PCR	Negative	cELISA	Negative
353	353	Blood, Oropharyngeal swab and cloacal swabs	2016	Hakaluki wetland	Barlekha	Sylhet	Bangladesh	Chattogram Veterinary and Animal Sciences University	Anas platyrhynchos domesticus	Domestic duck	Healthy	Active surveillance	Undefined	Adult	Household	without chicken	19	7	Illitarate	real-time RT-PCR	Negative	cELISA	Negative
354	354	Blood, Oropharyngeal swab and cloacal swabs	2016	Hakaluki wetland	Barlekha	Sylhet	Bangladesh	Chattogram Veterinary and Animal Sciences University	Anas platyrhynchos domesticus	Domestic duck	Healthy	Active surveillance	Undefined	Adult	Household	without chicken	20	5	Literate	real-time RT-PCR	Negative	cELISA	Negative
355	355	Blood, Oropharyngeal swab and cloacal swabs	2016	Hakaluki wetland	Barlekha	Sylhet	Bangladesh	Chattogram Veterinary and Animal Sciences University	Anas platyrhynchos domesticus	Domestic duck	Healthy	Active surveillance	Undefined	Adult	Household	without chicken	21	8	Literate	real-time RT-PCR	Negative	cELISA	Negative
356	356	Blood, Oropharyngeal swab and cloacal swabs	2016	Hakaluki wetland	Barlekha	Sylhet	Bangladesh	Chattogram Veterinary and Animal Sciences University	Anas platyrhynchos domesticus	Domestic duck	Healthy	Active surveillance	Undefined	Adult	Household	without chicken	22	10	Literate	real-time RT-PCR	Negative	cELISA	Positive
357	357	Blood, Oropharyngeal swab and cloacal swabs	2016	Hakaluki wetland	Barlekha	Sylhet	Bangladesh	Chattogram Veterinary and Animal Sciences University	Anas platyrhynchos domesticus	Domestic duck	Healthy	Active surveillance	Undefined	Adult	Household	without chicken	23	11	Illitarate	real-time RT-PCR	Negative	cELISA	Negative
358	358	Blood, Oropharyngeal swab and cloacal swabs	2016	Hakaluki wetland	Barlekha	Sylhet	Bangladesh	Chattogram Veterinary and Animal Sciences University	Anas platyrhynchos domesticus	Domestic duck	Healthy	Active surveillance	Undefined	Adult	Household	with chicken	24	5	Literate	real-time RT-PCR	Negative	cELISA	Negative
359	359	Blood, Oropharyngeal swab and cloacal swabs	2016	Hakaluki wetland	Barlekha	Sylhet	Bangladesh	Chattogram Veterinary and Animal Sciences University	Anas platyrhynchos domesticus	Domestic duck	Healthy	Active surveillance	Undefined	Adult	Household	with chicken	25	7	Illitarate	real-time RT-PCR	Negative	cELISA	Negative
360	360	Blood, Oropharyngeal swab and cloacal swabs	2016	Hakaluki wetland	Barlekha	Sylhet	Bangladesh	Chattogram Veterinary and Animal Sciences University	Anas platyrhynchos domesticus	Domestic duck	Healthy	Active surveillance	Undefined	Adult	Household	with chicken	26	9	Illitarate	real-time RT-PCR	Negative	cELISA	Negative
361	361	Blood, Oropharyngeal swab and cloacal swabs	2016	Hakaluki wetland	Barlekha	Sylhet	Bangladesh	Chattogram Veterinary and Animal Sciences University	Anas platyrhynchos domesticus	Domestic duck	Healthy	Active surveillance	Undefined	Adult	Household	with chicken	27	5	Illitarate	real-time RT-PCR	Negative	cELISA	Positive
362	362	Blood, Oropharyngeal swab and cloacal swabs	2016	Hakaluki wetland	Barlekha	Sylhet	Bangladesh	Chattogram Veterinary and Animal Sciences University	Anas platyrhynchos domesticus	Domestic duck	Healthy	Active surveillance	Undefined	Adult	Household	with chicken	28	7	Illitarate	real-time RT-PCR	Negative	cELISA	Positive
363	363	Blood, Oropharyngeal swab and cloacal swabs	2016	Hakaluki wetland	Barlekha	Sylhet	Bangladesh	Chattogram Veterinary and Animal Sciences University	Anas platyrhynchos domesticus	Domestic duck	Healthy	Active surveillance	Undefined	Adult	Household	with chicken	29	9	Illitarate	real-time RT-PCR	Negative	cELISA	Negative
364	364	Blood, Oropharyngeal swab and cloacal swabs	2016	Hakaluki wetland	Barlekha	Sylhet	Bangladesh	Chattogram Veterinary and Animal Sciences University	Anas platyrhynchos domesticus	Domestic duck	Healthy	Active surveillance	Undefined	Adult	Household	with chicken	30	8	Illitarate	real-time RT-PCR	Negative	cELISA	Positive
365	365	Blood, Oropharyngeal swab and cloacal swabs	2016	Hakaluki wetland	Barlekha	Sylhet	Bangladesh	Chattogram Veterinary and Animal Sciences University	Anas platyrhynchos domesticus	Domestic duck	Healthy	Active surveillance	Undefined	Adult	Household	without chicken	31	8	Illitarate	real-time RT-PCR	Negative	cELISA	Positive
366	366	Blood, Oropharyngeal swab and cloacal swabs	2016	Hakaluki wetland	Barlekha	Sylhet	Bangladesh	Chattogram Veterinary and Animal Sciences University	Anas platyrhynchos domesticus	Domestic duck	Healthy	Active surveillance	Undefined	Adult	Household	without chicken	32	6	Illitarate	real-time RT-PCR	Negative	cELISA	Positive
367	367	Blood, Oropharyngeal swab and cloacal swabs	2016	Hakaluki wetland	Barlekha	Sylhet	Bangladesh	Chattogram Veterinary and Animal Sciences University	Anas platyrhynchos domesticus	Domestic duck	Healthy	Active surveillance	Undefined	Adult	Household	without chicken	33	7	Literate	real-time RT-PCR	Negative	cELISA	Negative
368	368	Blood, Oropharyngeal swab and cloacal swabs	2016	Hakaluki wetland	Barlekha	Sylhet	Bangladesh	Chattogram Veterinary and Animal Sciences University	Anas platyrhynchos domesticus	Domestic duck	Healthy	Active surveillance	Undefined	Adult	Household	without chicken	34	5	Literate	real-time RT-PCR	Negative	cELISA	Positive
369	369	Blood, Oropharyngeal swab and cloacal swabs	2016	Hakaluki wetland	Barlekha	Sylhet	Bangladesh	Chattogram Veterinary and Animal Sciences University	Anas platyrhynchos domesticus	Domestic duck	Healthy	Active surveillance	Undefined	Adult	Household	without chicken	35	6	Literate	real-time RT-PCR	Negative	cELISA	Negative
370	370	Blood, Oropharyngeal swab and cloacal swabs	2016	Hakaluki wetland	Bhatera	Sylhet	Bangladesh	Chattogram Veterinary and Animal Sciences University	Anas platyrhynchos domesticus	Domestic duck	Healthy	Active surveillance	Undefined	Adult	Household	without chicken	36	7	Literate	real-time RT-PCR	Negative	cELISA	Negative
371	371	Blood, Oropharyngeal swab and cloacal swabs	2016	Hakaluki wetland	Bhatera	Sylhet	Bangladesh	Chattogram Veterinary and Animal Sciences University	Anas platyrhynchos domesticus	Domestic duck	Healthy	Active surveillance	Undefined	Adult	Household	without chicken	37	5	Literate	real-time RT-PCR	Negative	cELISA	Negative
372	372	Blood, Oropharyngeal swab and cloacal swabs	2016	Hakaluki wetland	Bhatera	Sylhet	Bangladesh	Chattogram Veterinary and Animal Sciences University	Anas platyrhynchos domesticus	Domestic duck	Healthy	Active surveillance	Undefined	Adult	Household	without chicken	38	8	Illitarate	real-time RT-PCR	Negative	cELISA	Negative
373	373	Blood, Oropharyngeal swab and cloacal swabs	2016	Hakaluki wetland	Bhatera	Sylhet	Bangladesh	Chattogram Veterinary and Animal Sciences University	Anas platyrhynchos domesticus	Domestic duck	Healthy	Active surveillance	Undefined	Adult	Household	without chicken	39	5	Illitarate	real-time RT-PCR	Negative	cELISA	Negative
374	374	Blood, Oropharyngeal swab and cloacal swabs	2016	Hakaluki wetland	Bhatera	Sylhet	Bangladesh	Chattogram Veterinary and Animal Sciences University	Anas platyrhynchos domesticus	Domestic duck	Healthy	Active surveillance	Undefined	Adult	Household	without chicken	40	9	Illitarate	real-time RT-PCR	Negative	cELISA	Positive
375	375	Blood, Oropharyngeal swab and cloacal swabs	2016	Hakaluki wetland	Bhatera	Sylhet	Bangladesh	Chattogram Veterinary and Animal Sciences University	Anas platyrhynchos domesticus	Domestic duck	Healthy	Active surveillance	Undefined	Adult	Household	without chicken	41	6	Illitarate	real-time RT-PCR	Negative	cELISA	Positive
376	376	Blood, Oropharyngeal swab and cloacal swabs	2016	Hakaluki wetland	Bhatera	Sylhet	Bangladesh	Chattogram Veterinary and Animal Sciences University	Anas platyrhynchos domesticus	Domestic duck	Healthy	Active surveillance	Undefined	Adult	Household	without chicken	42	8	Illitarate	real-time RT-PCR	Negative	cELISA	Positive
377	377	Blood, Oropharyngeal swab and cloacal swabs	2016	Hakaluki wetland	Bhatera	Sylhet	Bangladesh	Chattogram Veterinary and Animal Sciences University	Anas platyrhynchos domesticus	Domestic duck	Healthy	Active surveillance	Undefined	Adult	Household	without chicken	43	11	Illitarate	real-time RT-PCR	Negative	cELISA	Negative
378	378	Blood, Oropharyngeal swab and cloacal swabs	2016	Hakaluki wetland	Bhatera	Sylhet	Bangladesh	Chattogram Veterinary and Animal Sciences University	Anas platyrhynchos domesticus	Domestic duck	Healthy	Active surveillance	Undefined	Adult	Household	without chicken	44	7	Illitarate	real-time RT-PCR	Negative	cELISA	Positive
379	379	Blood, Oropharyngeal swab and cloacal swabs	2016	Hakaluki wetland	Bhatera	Sylhet	Bangladesh	Chattogram Veterinary and Animal Sciences University	Anas platyrhynchos domesticus	Domestic duck	Healthy	Active surveillance	Undefined	Adult	Household	without chicken	45	8	Illitarate	real-time RT-PCR	Negative	cELISA	Positive
380	380	Blood, Oropharyngeal swab and cloacal swabs	2016	Hakaluki wetland	Bhatera	Sylhet	Bangladesh	Chattogram Veterinary and Animal Sciences University	Anas platyrhynchos domesticus	Domestic duck	Healthy	Active surveillance	Undefined	Adult	Household	without chicken	46	5	Illitarate	real-time RT-PCR	Negative	cELISA	Positive
381	381	Blood, Oropharyngeal swab and cloacal swabs	2016	Hakaluki wetland	Bhatera	Sylhet	Bangladesh	Chattogram Veterinary and Animal Sciences University	Anas platyrhynchos domesticus	Domestic duck	Healthy	Active surveillance	Undefined	Adult	Household	without chicken	47	7	Illitarate	real-time RT-PCR	Negative	cELISA	Positive
382	382	Blood, Oropharyngeal swab and cloacal swabs	2016	Hakaluki wetland	Bhatera	Sylhet	Bangladesh	Chattogram Veterinary and Animal Sciences University	Anas platyrhynchos domesticus	Domestic duck	Healthy	Active surveillance	Undefined	Adult	Free-range domestic	waterfowl	4	322	Literate	real-time RT-PCR	Negative	cELISA	Positive
383	383	Blood, Oropharyngeal swab and cloacal swabs	2016	Hakaluki wetland	Bhatera	Sylhet	Bangladesh	Chattogram Veterinary and Animal Sciences University	Anas platyrhynchos domesticus	Domestic duck	Healthy	Active surveillance	Undefined	Adult	Free-range domestic	waterfowl	4	322	Literate	real-time RT-PCR	Negative	cELISA	Positive
384	384	Blood, Oropharyngeal swab and cloacal swabs	2016	Hakaluki wetland	Bhatera	Sylhet	Bangladesh	Chattogram Veterinary and Animal Sciences University	Anas platyrhynchos domesticus	Domestic duck	Healthy	Active surveillance	Undefined	Adult	Free-range domestic	waterfowl	5	400	Literate	real-time RT-PCR	Negative	cELISA	Negative
385	385	Blood, Oropharyngeal swab and cloacal swabs	2016	Hakaluki wetland	Bhatera	Sylhet	Bangladesh	Chattogram Veterinary and Animal Sciences University	Anas platyrhynchos domesticus	Domestic duck	Healthy	Active surveillance	Undefined	Adult	Free-range domestic	waterfowl	5	400	Literate	real-time RT-PCR	Negative	cELISA	Positive
386	386	Blood, Oropharyngeal swab and cloacal swabs	2016	Hakaluki wetland	Bhatera	Sylhet	Bangladesh	Chattogram Veterinary and Animal Sciences University	Anas platyrhynchos domesticus	Domestic duck	Healthy	Active surveillance	Undefined	Adult	Free-range domestic	waterfowl	5	400	Literate	real-time RT-PCR	Negative	cELISA	Positive
387	387	Blood, Oropharyngeal swab and cloacal swabs	2016	Hakaluki wetland	Bhatera	Sylhet	Bangladesh	Chattogram Veterinary and Animal Sciences University	Anas platyrhynchos domesticus	Domestic duck	Healthy	Active surveillance	Undefined	Adult	Free-range domestic	waterfowl	5	400	Literate	real-time RT-PCR	Negative	cELISA	Positive
388	388	Blood, Oropharyngeal swab and cloacal swabs	2016	Hakaluki wetland	Bhatera	Sylhet	Bangladesh	Chattogram Veterinary and Animal Sciences University	Anas platyrhynchos domesticus	Domestic duck	Healthy	Active surveillance	Undefined	Adult	Free-range domestic	waterfowl	5	400	Literate	real-time RT-PCR	Negative	cELISA	Positive
389	389	Blood, Oropharyngeal swab and cloacal swabs	2016	Hakaluki wetland	Bhatera	Sylhet	Bangladesh	Chattogram Veterinary and Animal Sciences University	Anas platyrhynchos domesticus	Domestic duck	Healthy	Active surveillance	Undefined	Adult	Free-range domestic	waterfowl	6	580	Literate	real-time RT-PCR	Negative	cELISA	Positive
390	390	Blood, Oropharyngeal swab and cloacal swabs	2016	Hakaluki wetland	Bhatera	Sylhet	Bangladesh	Chattogram Veterinary and Animal Sciences University	Anas platyrhynchos domesticus	Domestic duck	Healthy	Active surveillance	Undefined	Adult	Free-range domestic	waterfowl	6	580	Literate	real-time RT-PCR	Negative	cELISA	Positive
391	391	Blood, Oropharyngeal swab and cloacal swabs	2016	Hakaluki wetland	Bhatera	Sylhet	Bangladesh	Chattogram Veterinary and Animal Sciences University	Anas platyrhynchos domesticus	Domestic duck	Healthy	Active surveillance	Undefined	Adult	Free-range domestic	waterfowl	6	580	Literate	real-time RT-PCR	Negative	cELISA	Positive
392	392	Blood, Oropharyngeal swab and cloacal swabs	2016	Hakaluki wetland	Bhatera	Sylhet	Bangladesh	Chattogram Veterinary and Animal Sciences University	Anas platyrhynchos domesticus	Domestic duck	Healthy	Active surveillance	Undefined	Adult	Free-range domestic	waterfowl	6	580	Literate	real-time RT-PCR	Negative	cELISA	Positive
393	393	Blood, Oropharyngeal swab and cloacal swabs	2016	Hakaluki wetland	Bhatera	Sylhet	Bangladesh	Chattogram Veterinary and Animal Sciences University	Anas platyrhynchos domesticus	Domestic duck	Healthy	Active surveillance	Undefined	Adult	Free-range domestic	waterfowl	6	580	Literate	real-time RT-PCR	Negative	cELISA	Negative
394	394	Blood, Oropharyngeal swab and cloacal swabs	2016	Hakaluki wetland	Bhatera	Sylhet	Bangladesh	Chattogram Veterinary and Animal Sciences University	Anas platyrhynchos domesticus	Domestic duck	Healthy	Active surveillance	Undefined	Adult	Free-range domestic	waterfowl	7	760	Literate	real-time RT-PCR	Negative	cELISA	Negative
395	395	Blood, Oropharyngeal swab and cloacal swabs	2016	Hakaluki wetland	Bhatera	Sylhet	Bangladesh	Chattogram Veterinary and Animal Sciences University	Anas platyrhynchos domesticus	Domestic duck	Healthy	Active surveillance	Undefined	Adult	Free-range domestic	waterfowl	7	760	Literate	real-time RT-PCR	Negative	cELISA	Positive
396	396	Blood, Oropharyngeal swab and cloacal swabs	2016	Hakaluki wetland	Bhatera	Sylhet	Bangladesh	Chattogram Veterinary and Animal Sciences University	Anas platyrhynchos domesticus	Domestic duck	Healthy	Active surveillance	Undefined	Adult	Free-range domestic	waterfowl	7	760	Literate	real-time RT-PCR	Negative	cELISA	Positive
397	397	Blood, Oropharyngeal swab and cloacal swabs	2016	Hakaluki wetland	Bhatera	Sylhet	Bangladesh	Chattogram Veterinary and Animal Sciences University	Anas platyrhynchos domesticus	Domestic duck	Healthy	Active surveillance	Undefined	Adult	Free-range domestic	waterfowl	7	760	Literate	real-time RT-PCR	Negative	cELISA	Positive
398	398	Blood, Oropharyngeal swab and cloacal swabs	2016	Hakaluki wetland	Bhatera	Sylhet	Bangladesh	Chattogram Veterinary and Animal Sciences University	Anas platyrhynchos domesticus	Domestic duck	Healthy	Active surveillance	Undefined	Adult	Free-range domestic	waterfowl	7	760	Literate	real-time RT-PCR	Negative	cELISA	Positive
399	399	Blood, Oropharyngeal swab and cloacal swabs	2016	Hakaluki wetland	Jaifornagar	Sylhet	Bangladesh	Chattogram Veterinary and Animal Sciences University	Anas platyrhynchos domesticus	Domestic duck	Healthy	Active surveillance	Undefined	Adult	Free-range domestic	waterfowl	8	690	Illitarate	real-time RT-PCR	Negative	cELISA	Positive
400	400	Blood, Oropharyngeal swab and cloacal swabs	2016	Hakaluki wetland	Jaifornagar	Sylhet	Bangladesh	Chattogram Veterinary and Animal Sciences University	Anas platyrhynchos domesticus	Domestic duck	Healthy	Active surveillance	Undefined	Adult	Free-range domestic	waterfowl	8	690	Illitarate	real-time RT-PCR	Negative	cELISA	Negative
401	401	Blood, Oropharyngeal swab and cloacal swabs	2016	Hakaluki wetland	Jaifornagar	Sylhet	Bangladesh	Chattogram Veterinary and Animal Sciences University	Anas platyrhynchos domesticus	Domestic duck	Healthy	Active surveillance	Undefined	Adult	Free-range domestic	waterfowl	8	690	Illitarate	real-time RT-PCR	Negative	cELISA	Positive
402	402	Blood, Oropharyngeal swab and cloacal swabs	2016	Hakaluki wetland	Jaifornagar	Sylhet	Bangladesh	Chattogram Veterinary and Animal Sciences University	Anas platyrhynchos domesticus	Domestic duck	Healthy	Active surveillance	Undefined	Adult	Free-range domestic	waterfowl	8	690	Illitarate	real-time RT-PCR	Negative	cELISA	Negative
403	403	Blood, Oropharyngeal swab and cloacal swabs	2016	Hakaluki wetland	Jaifornagar	Sylhet	Bangladesh	Chattogram Veterinary and Animal Sciences University	Anas platyrhynchos domesticus	Domestic duck	Healthy	Active surveillance	Undefined	Adult	Free-range domestic	waterfowl	8	690	Illitarate	real-time RT-PCR	Negative	cELISA	Negative
404	404	Blood, Oropharyngeal swab and cloacal swabs	2016	Hakaluki wetland	Jaifornagar	Sylhet	Bangladesh	Chattogram Veterinary and Animal Sciences University	Anas platyrhynchos domesticus	Domestic duck	Healthy	Active surveillance	Undefined	Adult	Free-range domestic	waterfowl	9	542	Literate	real-time RT-PCR	Negative	cELISA	Negative
405	405	Blood, Oropharyngeal swab and cloacal swabs	2016	Hakaluki wetland	Jaifornagar	Sylhet	Bangladesh	Chattogram Veterinary and Animal Sciences University	Anas platyrhynchos domesticus	Domestic duck	Healthy	Active surveillance	Undefined	Adult	Free-range domestic	waterfowl	9	542	Literate	real-time RT-PCR	Negative	cELISA	Negative
406	406	Blood, Oropharyngeal swab and cloacal swabs	2016	Hakaluki wetland	Jaifornagar	Sylhet	Bangladesh	Chattogram Veterinary and Animal Sciences University	Anas platyrhynchos domesticus	Domestic duck	Healthy	Active surveillance	Undefined	Adult	Free-range domestic	waterfowl	9	542	Literate	real-time RT-PCR	Negative	cELISA	Negative
407	407	Blood, Oropharyngeal swab and cloacal swabs	2016	Hakaluki wetland	Jaifornagar	Sylhet	Bangladesh	Chattogram Veterinary and Animal Sciences University	Anas platyrhynchos domesticus	Domestic duck	Healthy	Active surveillance	Undefined	Adult	Free-range domestic	waterfowl	9	542	Literate	real-time RT-PCR	Negative	cELISA	Negative
408	408	Blood, Oropharyngeal swab and cloacal swabs	2016	Hakaluki wetland	Jaifornagar	Sylhet	Bangladesh	Chattogram Veterinary and Animal Sciences University	Anas platyrhynchos domesticus	Domestic duck	Healthy	Active surveillance	Undefined	Adult	Free-range domestic	waterfowl	9	542	Literate	real-time RT-PCR	Negative	cELISA	Negative
409	409	Blood, Oropharyngeal swab and cloacal swabs	2016	Hakaluki wetland	Jaifornagar	Sylhet	Bangladesh	Chattogram Veterinary and Animal Sciences University	Anas platyrhynchos domesticus	Domestic duck	Healthy	Active surveillance	Undefined	Adult	Free-range domestic	waterfowl	10	457	Illitarate	real-time RT-PCR	Negative	cELISA	Negative
410	410	Blood, Oropharyngeal swab and cloacal swabs	2016	Hakaluki wetland	Jaifornagar	Sylhet	Bangladesh	Chattogram Veterinary and Animal Sciences University	Anas platyrhynchos domesticus	Domestic duck	Healthy	Active surveillance	Undefined	Adult	Free-range domestic	waterfowl	10	457	Illitarate	real-time RT-PCR	Positive	cELISA	Positive
411	411	Blood, Oropharyngeal swab and cloacal swabs	2016	Hakaluki wetland	Jaifornagar	Sylhet	Bangladesh	Chattogram Veterinary and Animal Sciences University	Anas platyrhynchos domesticus	Domestic duck	Healthy	Active surveillance	Undefined	Adult	Free-range domestic	waterfowl	10	457	Illitarate	real-time RT-PCR	Positive	cELISA	Negative
412	412	Blood, Oropharyngeal swab and cloacal swabs	2016	Hakaluki wetland	Jaifornagar	Sylhet	Bangladesh	Chattogram Veterinary and Animal Sciences University	Anas platyrhynchos domesticus	Domestic duck	Healthy	Active surveillance	Undefined	Adult	Free-range domestic	waterfowl	10	457	Illitarate	real-time RT-PCR	Positive	cELISA	Negative
413	413	Blood, Oropharyngeal swab and cloacal swabs	2016	Hakaluki wetland	Jaifornagar	Sylhet	Bangladesh	Chattogram Veterinary and Animal Sciences University	Anas platyrhynchos domesticus	Domestic duck	Healthy	Active surveillance	Undefined	Adult	Free-range domestic	waterfowl	10	457	Illitarate	real-time RT-PCR	Negative	cELISA	Negative
414	414	Blood, Oropharyngeal swab and cloacal swabs	2016	Tanguar wetland	Kalmakanda	Sylhet	Bangladesh	Chattogram Veterinary and Animal Sciences University	Anas platyrhynchos domesticus	Domestic duck	Healthy	Active surveillance	Undefined	Adult	Free-range domestic	waterfowl	11	340	Illitarate	real-time RT-PCR	Negative	cELISA	Positive
415	415	Blood, Oropharyngeal swab and cloacal swabs	2016	Tanguar wetland	Kalmakanda	Sylhet	Bangladesh	Chattogram Veterinary and Animal Sciences University	Anas platyrhynchos domesticus	Domestic duck	Healthy	Active surveillance	Undefined	Adult	Free-range domestic	waterfowl	11	340	Illitarate	real-time RT-PCR	Negative	cELISA	Positive
416	416	Blood, Oropharyngeal swab and cloacal swabs	2016	Tanguar wetland	Kalmakanda	Sylhet	Bangladesh	Chattogram Veterinary and Animal Sciences University	Anas platyrhynchos domesticus	Domestic duck	Healthy	Active surveillance	Undefined	Adult	Free-range domestic	waterfowl	11	340	Illitarate	real-time RT-PCR	Negative	cELISA	Positive
417	417	Blood, Oropharyngeal swab and cloacal swabs	2016	Tanguar wetland	Kalmakanda	Sylhet	Bangladesh	Chattogram Veterinary and Animal Sciences University	Anas platyrhynchos domesticus	Domestic duck	Healthy	Active surveillance	Undefined	Adult	Free-range domestic	waterfowl	11	340	Illitarate	real-time RT-PCR	Negative	cELISA	Positive
418	418	Blood, Oropharyngeal swab and cloacal swabs	2016	Tanguar wetland	Kalmakanda	Sylhet	Bangladesh	Chattogram Veterinary and Animal Sciences University	Anas platyrhynchos domesticus	Domestic duck	Healthy	Active surveillance	Undefined	Adult	Free-range domestic	waterfowl	11	340	Illitarate	real-time RT-PCR	Negative	cELISA	Positive
419	419	Blood, Oropharyngeal swab and cloacal swabs	2016	Tanguar wetland	Kalmakanda	Sylhet	Bangladesh	Chattogram Veterinary and Animal Sciences University	Anas platyrhynchos domesticus	Domestic duck	Healthy	Active surveillance	Undefined	Adult	Free-range domestic	waterfowl	12	380	Literate	real-time RT-PCR	Negative	cELISA	Positive
420	420	Blood, Oropharyngeal swab and cloacal swabs	2016	Tanguar wetland	Kalmakanda	Sylhet	Bangladesh	Chattogram Veterinary and Animal Sciences University	Anas platyrhynchos domesticus	Domestic duck	Healthy	Active surveillance	Undefined	Adult	Free-range domestic	waterfowl	12	380	Literate	real-time RT-PCR	Negative	cELISA	Positive
421	421	Blood, Oropharyngeal swab and cloacal swabs	2016	Tanguar wetland	Kalmakanda	Sylhet	Bangladesh	Chattogram Veterinary and Animal Sciences University	Anas platyrhynchos domesticus	Domestic duck	Healthy	Active surveillance	Undefined	Adult	Free-range domestic	waterfowl	12	380	Literate	real-time RT-PCR	Negative	cELISA	Positive
422	422	Blood, Oropharyngeal swab and cloacal swabs	2016	Tanguar wetland	Kalmakanda	Sylhet	Bangladesh	Chattogram Veterinary and Animal Sciences University	Anas platyrhynchos domesticus	Domestic duck	Healthy	Active surveillance	Undefined	Adult	Free-range domestic	waterfowl	12	380	Literate	real-time RT-PCR	Negative	cELISA	Positive
423	423	Blood, Oropharyngeal swab and cloacal swabs	2016	Tanguar wetland	Kalmakanda	Sylhet	Bangladesh	Chattogram Veterinary and Animal Sciences University	Anas platyrhynchos domesticus	Domestic duck	Healthy	Active surveillance	Undefined	Adult	Free-range domestic	waterfowl	12	380	Literate	real-time RT-PCR	Negative	cELISA	Positive
424	424	Blood, Oropharyngeal swab and cloacal swabs	2016	Tanguar wetland	Kalmakanda	Sylhet	Bangladesh	Chattogram Veterinary and Animal Sciences University	Anas platyrhynchos domesticus	Domestic duck	Healthy	Active surveillance	Undefined	Adult	Free-range domestic	waterfowl	13	450	Literate	real-time RT-PCR	Negative	cELISA	Positive
425	425	Blood, Oropharyngeal swab and cloacal swabs	2016	Tanguar wetland	Kalmakanda	Sylhet	Bangladesh	Chattogram Veterinary and Animal Sciences University	Anas platyrhynchos domesticus	Domestic duck	Healthy	Active surveillance	Undefined	Adult	Free-range domestic	waterfowl	13	450	Literate	real-time RT-PCR	Negative	cELISA	Positive
426	426	Blood, Oropharyngeal swab and cloacal swabs	2016	Tanguar wetland	Kalmakanda	Sylhet	Bangladesh	Chattogram Veterinary and Animal Sciences University	Anas platyrhynchos domesticus	Domestic duck	Healthy	Active surveillance	Undefined	Adult	Free-range domestic	waterfowl	13	450	Literate	real-time RT-PCR	Negative	cELISA	Negative
427	427	Blood, Oropharyngeal swab and cloacal swabs	2016	Tanguar wetland	Kalmakanda	Sylhet	Bangladesh	Chattogram Veterinary and Animal Sciences University	Anas platyrhynchos domesticus	Domestic duck	Healthy	Active surveillance	Undefined	Adult	Free-range domestic	waterfowl	13	450	Literate	real-time RT-PCR	Negative	cELISA	Positive
428	428	Blood, Oropharyngeal swab and cloacal swabs	2016	Tanguar wetland	Kalmakanda	Sylhet	Bangladesh	Chattogram Veterinary and Animal Sciences University	Anas platyrhynchos domesticus	Domestic duck	Healthy	Active surveillance	Undefined	Adult	Free-range domestic	waterfowl	13	450	Literate	real-time RT-PCR	Negative	cELISA	Positive
429	429	Blood, Oropharyngeal swab and cloacal swabs	2016	Tanguar wetland	Jamalganj	Sylhet	Bangladesh	Chattogram Veterinary and Animal Sciences University	Anas platyrhynchos domesticus	Domestic duck	Healthy	Active surveillance	Undefined	Adult	Free-range domestic	waterfowl	14	320	Literate	real-time RT-PCR	Negative	cELISA	Negative
430	430	Blood, Oropharyngeal swab and cloacal swabs	2016	Tanguar wetland	Jamalganj	Sylhet	Bangladesh	Chattogram Veterinary and Animal Sciences University	Anas platyrhynchos domesticus	Domestic duck	Healthy	Active surveillance	Undefined	Adult	Free-range domestic	waterfowl	14	320	Literate	real-time RT-PCR	Negative	cELISA	Positive
431	431	Blood, Oropharyngeal swab and cloacal swabs	2016	Tanguar wetland	Jamalganj	Sylhet	Bangladesh	Chattogram Veterinary and Animal Sciences University	Anas platyrhynchos domesticus	Domestic duck	Healthy	Active surveillance	Undefined	Adult	Free-range domestic	waterfowl	14	320	Literate	real-time RT-PCR	Negative	cELISA	Positive
432	432	Blood, Oropharyngeal swab and cloacal swabs	2016	Tanguar wetland	Jamalganj	Sylhet	Bangladesh	Chattogram Veterinary and Animal Sciences University	Anas platyrhynchos domesticus	Domestic duck	Healthy	Active surveillance	Undefined	Adult	Free-range domestic	waterfowl	14	320	Literate	real-time RT-PCR	Negative	cELISA	Negative
433	433	Blood, Oropharyngeal swab and cloacal swabs	2016	Tanguar wetland	Jamalganj	Sylhet	Bangladesh	Chattogram Veterinary and Animal Sciences University	Anas platyrhynchos domesticus	Domestic duck	Healthy	Active surveillance	Undefined	Adult	Free-range domestic	waterfowl	14	320	Literate	real-time RT-PCR	Negative	cELISA	Negative
434	434	Blood, Oropharyngeal swab and cloacal swabs	2016	Tanguar wetland	Jamalganj	Sylhet	Bangladesh	Chattogram Veterinary and Animal Sciences University	Anas platyrhynchos domesticus	Domestic duck	Healthy	Active surveillance	Undefined	Adult	Free-range domestic	waterfowl	15	310	Literate	real-time RT-PCR	Negative	cELISA	Negative
435	435	Blood, Oropharyngeal swab and cloacal swabs	2016	Tanguar wetland	Jamalganj	Sylhet	Bangladesh	Chattogram Veterinary and Animal Sciences University	Anas platyrhynchos domesticus	Domestic duck	Healthy	Active surveillance	Undefined	Adult	Free-range domestic	waterfowl	15	310	Literate	real-time RT-PCR	Negative	cELISA	Negative
436	436	Blood, Oropharyngeal swab and cloacal swabs	2016	Tanguar wetland	Jamalganj	Sylhet	Bangladesh	Chattogram Veterinary and Animal Sciences University	Anas platyrhynchos domesticus	Domestic duck	Healthy	Active surveillance	Undefined	Adult	Free-range domestic	waterfowl	15	310	Literate	real-time RT-PCR	Negative	cELISA	Negative
437	437	Blood, Oropharyngeal swab and cloacal swabs	2016	Tanguar wetland	Jamalganj	Sylhet	Bangladesh	Chattogram Veterinary and Animal Sciences University	Anas platyrhynchos domesticus	Domestic duck	Healthy	Active surveillance	Undefined	Adult	Free-range domestic	waterfowl	15	310	Literate	real-time RT-PCR	Negative	cELISA	Negative
438	438	Blood, Oropharyngeal swab and cloacal swabs	2016	Tanguar wetland	Jamalganj	Sylhet	Bangladesh	Chattogram Veterinary and Animal Sciences University	Anas platyrhynchos domesticus	Domestic duck	Healthy	Active surveillance	Undefined	Adult	Free-range domestic	waterfowl	15	310	Literate	real-time RT-PCR	Negative	cELISA	Positive
439	439	Blood, Oropharyngeal swab and cloacal swabs	2016	Tanguar wetland	Jamalganj	Sylhet	Bangladesh	Chattogram Veterinary and Animal Sciences University	Anas platyrhynchos domesticus	Domestic duck	Healthy	Active surveillance	Undefined	Adult	Free-range domestic	waterfowl	16	543	Literate	real-time RT-PCR	Negative	cELISA	Positive
440	440	Blood, Oropharyngeal swab and cloacal swabs	2016	Tanguar wetland	Jamalganj	Sylhet	Bangladesh	Chattogram Veterinary and Animal Sciences University	Anas platyrhynchos domesticus	Domestic duck	Healthy	Active surveillance	Undefined	Adult	Free-range domestic	waterfowl	16	543	Literate	real-time RT-PCR	Negative	cELISA	Positive
441	441	Blood, Oropharyngeal swab and cloacal swabs	2016	Tanguar wetland	Jamalganj	Sylhet	Bangladesh	Chattogram Veterinary and Animal Sciences University	Anas platyrhynchos domesticus	Domestic duck	Healthy	Active surveillance	Undefined	Adult	Free-range domestic	waterfowl	16	543	Literate	real-time RT-PCR	Negative	cELISA	Positive
442	442	Blood, Oropharyngeal swab and cloacal swabs	2016	Tanguar wetland	Jamalganj	Sylhet	Bangladesh	Chattogram Veterinary and Animal Sciences University	Anas platyrhynchos domesticus	Domestic duck	Healthy	Active surveillance	Undefined	Adult	Free-range domestic	waterfowl	16	543	Literate	real-time RT-PCR	Negative	cELISA	Positive
443	443	Blood, Oropharyngeal swab and cloacal swabs	2016	Tanguar wetland	Jamalganj	Sylhet	Bangladesh	Chattogram Veterinary and Animal Sciences University	Anas platyrhynchos domesticus	Domestic duck	Healthy	Active surveillance	Undefined	Adult	Free-range domestic	waterfowl	16	543	Literate	real-time RT-PCR	Negative	cELISA	Positive
444	444	Blood, Oropharyngeal swab and cloacal swabs	2016	Tanguar wetland	Jamalganj	Sylhet	Bangladesh	Chattogram Veterinary and Animal Sciences University	Anas platyrhynchos domesticus	Domestic duck	Healthy	Active surveillance	Undefined	Adult	Free-range domestic	waterfowl	17	620	Literate	real-time RT-PCR	Negative	cELISA	Positive
445	445	Blood, Oropharyngeal swab and cloacal swabs	2016	Tanguar wetland	Jamalganj	Sylhet	Bangladesh	Chattogram Veterinary and Animal Sciences University	Anas platyrhynchos domesticus	Domestic duck	Healthy	Active surveillance	Undefined	Adult	Household	with chicken	48	5	Illitarate	real-time RT-PCR	Negative	cELISA	Positive
446	446	Blood, Oropharyngeal swab and cloacal swabs	2016	Tanguar wetland	Jamalganj	Sylhet	Bangladesh	Chattogram Veterinary and Animal Sciences University	Anas platyrhynchos domesticus	Domestic duck	Healthy	Active surveillance	Undefined	Adult	Household	with chicken	49	9	Illitarate	real-time RT-PCR	Negative	cELISA	Positive
447	447	Blood, Oropharyngeal swab and cloacal swabs	2016	Tanguar wetland	Jamalganj	Sylhet	Bangladesh	Chattogram Veterinary and Animal Sciences University	Anas platyrhynchos domesticus	Domestic duck	Healthy	Active surveillance	Undefined	Adult	Household	with chicken	50	5	Illitarate	real-time RT-PCR	Negative	cELISA	Positive
448	448	Blood, Oropharyngeal swab and cloacal swabs	2016	Tanguar wetland	Jamalganj	Sylhet	Bangladesh	Chattogram Veterinary and Animal Sciences University	Anas platyrhynchos domesticus	Domestic duck	Healthy	Active surveillance	Undefined	Adult	Household	with chicken	51	10	Illitarate	real-time RT-PCR	Negative	cELISA	Positive
449	449	Blood, Oropharyngeal swab and cloacal swabs	2016	Tanguar wetland	Jamalganj	Sylhet	Bangladesh	Chattogram Veterinary and Animal Sciences University	Anas platyrhynchos domesticus	Domestic duck	Healthy	Active surveillance	Undefined	Adult	Household	with chicken	52	13	Illitarate	real-time RT-PCR	Negative	cELISA	Positive
450	450	Blood, Oropharyngeal swab and cloacal swabs	2016	Tanguar wetland	Jamalganj	Sylhet	Bangladesh	Chattogram Veterinary and Animal Sciences University	Anas platyrhynchos domesticus	Domestic duck	Healthy	Active surveillance	Undefined	Adult	Household	with chicken	53	6	Illitarate	real-time RT-PCR	Negative	cELISA	Positive
451	451	Blood, Oropharyngeal swab and cloacal swabs	2016	Tanguar wetland	Jamalganj	Sylhet	Bangladesh	Chattogram Veterinary and Animal Sciences University	Anas platyrhynchos domesticus	Domestic duck	Healthy	Active surveillance	Undefined	Adult	Household	with chicken	54	8	Illitarate	real-time RT-PCR	Negative	cELISA	Positive
452	452	Blood, Oropharyngeal swab and cloacal swabs	2016	Tanguar wetland	Jamalganj	Sylhet	Bangladesh	Chattogram Veterinary and Animal Sciences University	Anas platyrhynchos domesticus	Domestic duck	Healthy	Active surveillance	Undefined	Adult	Household	with chicken	55	5	Illitarate	real-time RT-PCR	Negative	cELISA	Positive
453	453	Blood, Oropharyngeal swab and cloacal swabs	2016	Tanguar wetland	Jamalganj	Sylhet	Bangladesh	Chattogram Veterinary and Animal Sciences University	Anas platyrhynchos domesticus	Domestic duck	Healthy	Active surveillance	Undefined	Adult	Household	with chicken	56	6	Literate	real-time RT-PCR	Negative	cELISA	Positive
454	454	Blood, Oropharyngeal swab and cloacal swabs	2016	Tanguar wetland	Jamalganj	Sylhet	Bangladesh	Chattogram Veterinary and Animal Sciences University	Anas platyrhynchos domesticus	Domestic duck	Healthy	Active surveillance	Undefined	Adult	Household	with chicken	57	8	Literate	real-time RT-PCR	Negative	cELISA	Positive
455	455	Blood, Oropharyngeal swab and cloacal swabs	2016	Tanguar wetland	Jamalganj	Sylhet	Bangladesh	Chattogram Veterinary and Animal Sciences University	Anas platyrhynchos domesticus	Domestic duck	Healthy	Active surveillance	Undefined	Adult	Household	with chicken	58	6	Literate	real-time RT-PCR	Negative	cELISA	Positive
456	456	Blood, Oropharyngeal swab and cloacal swabs	2016	Tanguar wetland	Jamalganj	Sylhet	Bangladesh	Chattogram Veterinary and Animal Sciences University	Anas platyrhynchos domesticus	Domestic duck	Healthy	Active surveillance	Undefined	Adult	Household	with chicken	59	7	Literate	real-time RT-PCR	Negative	cELISA	Positive
457	457	Blood, Oropharyngeal swab and cloacal swabs	2016	Tanguar wetland	Jamalganj	Sylhet	Bangladesh	Chattogram Veterinary and Animal Sciences University	Anas platyrhynchos domesticus	Domestic duck	Healthy	Active surveillance	Undefined	Adult	Household	without chicken	60	9	Literate	real-time RT-PCR	Negative	cELISA	Positive
458	458	Blood, Oropharyngeal swab and cloacal swabs	2016	Tanguar wetland	Dharmapasha	Sylhet	Bangladesh	Chattogram Veterinary and Animal Sciences University	Anas platyrhynchos domesticus	Domestic duck	Healthy	Active surveillance	Undefined	Adult	Household	without chicken	61	5	Literate	real-time RT-PCR	Negative	cELISA	Positive
459	459	Blood, Oropharyngeal swab and cloacal swabs	2016	Tanguar wetland	Dharmapasha	Sylhet	Bangladesh	Chattogram Veterinary and Animal Sciences University	Anas platyrhynchos domesticus	Domestic duck	Healthy	Active surveillance	Undefined	Adult	Household	without chicken	62	8	Literate	real-time RT-PCR	Negative	cELISA	Positive
460	460	Blood, Oropharyngeal swab and cloacal swabs	2016	Tanguar wetland	Dharmapasha	Sylhet	Bangladesh	Chattogram Veterinary and Animal Sciences University	Anas platyrhynchos domesticus	Domestic duck	Healthy	Active surveillance	Undefined	Adult	Household	without chicken	63	6	Literate	real-time RT-PCR	Negative	cELISA	Positive
461	461	Blood, Oropharyngeal swab and cloacal swabs	2016	Tanguar wetland	Dharmapasha	Sylhet	Bangladesh	Chattogram Veterinary and Animal Sciences University	Anas platyrhynchos domesticus	Domestic duck	Healthy	Active surveillance	Undefined	Adult	Household	without chicken	64	9	Literate	real-time RT-PCR	Negative	cELISA	Negative
462	462	Blood, Oropharyngeal swab and cloacal swabs	2016	Tanguar wetland	Dharmapasha	Sylhet	Bangladesh	Chattogram Veterinary and Animal Sciences University	Anas platyrhynchos domesticus	Domestic duck	Healthy	Active surveillance	Undefined	Adult	Household	without chicken	65	7	Literate	real-time RT-PCR	Negative	cELISA	Negative
463	463	Blood, Oropharyngeal swab and cloacal swabs	2016	Tanguar wetland	Dharmapasha	Sylhet	Bangladesh	Chattogram Veterinary and Animal Sciences University	Anas platyrhynchos domesticus	Domestic duck	Healthy	Active surveillance	Undefined	Adult	Household	without chicken	66	8	Literate	real-time RT-PCR	Negative	cELISA	Negative
464	464	Blood, Oropharyngeal swab and cloacal swabs	2016	Tanguar wetland	Dharmapasha	Sylhet	Bangladesh	Chattogram Veterinary and Animal Sciences University	Anas platyrhynchos domesticus	Domestic duck	Healthy	Active surveillance	Undefined	Adult	Household	without chicken	67	5	Literate	real-time RT-PCR	Negative	cELISA	Negative
465	465	Blood, Oropharyngeal swab and cloacal swabs	2016	Tanguar wetland	Dharmapasha	Sylhet	Bangladesh	Chattogram Veterinary and Animal Sciences University	Anas platyrhynchos domesticus	Domestic duck	Healthy	Active surveillance	Undefined	Adult	Household	with chicken	68	9	Literate	real-time RT-PCR	Negative	cELISA	Positive
466	466	Blood, Oropharyngeal swab and cloacal swabs	2016	Tanguar wetland	Dharmapasha	Sylhet	Bangladesh	Chattogram Veterinary and Animal Sciences University	Anas platyrhynchos domesticus	Domestic duck	Healthy	Active surveillance	Undefined	Adult	Household	with chicken	69	6	Literate	real-time RT-PCR	Negative	cELISA	Positive
467	467	Blood, Oropharyngeal swab and cloacal swabs	2016	Tanguar wetland	Dharmapasha	Sylhet	Bangladesh	Chattogram Veterinary and Animal Sciences University	Anas platyrhynchos domesticus	Domestic duck	Healthy	Active surveillance	Undefined	Adult	Household	with chicken	70	8	Literate	real-time RT-PCR	Negative	cELISA	Positive
468	468	Blood, Oropharyngeal swab and cloacal swabs	2016	Tanguar wetland	Dharmapasha	Sylhet	Bangladesh	Chattogram Veterinary and Animal Sciences University	Anas platyrhynchos domesticus	Domestic duck	Healthy	Active surveillance	Undefined	Adult	Household	with chicken	71	5	Literate	real-time RT-PCR	Negative	cELISA	Positive
469	469	Blood, Oropharyngeal swab and cloacal swabs	2016	Tanguar wetland	Dharmapasha	Sylhet	Bangladesh	Chattogram Veterinary and Animal Sciences University	Anas platyrhynchos domesticus	Domestic duck	Healthy	Active surveillance	Undefined	Adult	Household	with chicken	72	7	Literate	real-time RT-PCR	Negative	cELISA	Positive
470	470	Blood, Oropharyngeal swab and cloacal swabs	2016	Tanguar wetland	Dharmapasha	Sylhet	Bangladesh	Chattogram Veterinary and Animal Sciences University	Anas platyrhynchos domesticus	Domestic duck	Healthy	Active surveillance	Undefined	Adult	Household	with chicken	73	6	Literate	real-time RT-PCR	Negative	cELISA	Positive
471	471	Blood, Oropharyngeal swab and cloacal swabs	2016	Tanguar wetland	Dharmapasha	Sylhet	Bangladesh	Chattogram Veterinary and Animal Sciences University	Anas platyrhynchos domesticus	Domestic duck	Healthy	Active surveillance	Undefined	Adult	Household	with chicken	74	9	Illitarate	real-time RT-PCR	Negative	cELISA	Positive
472	472	Blood, Oropharyngeal swab and cloacal swabs	2016	Tanguar wetland	Dharmapasha	Sylhet	Bangladesh	Chattogram Veterinary and Animal Sciences University	Anas platyrhynchos domesticus	Domestic duck	Healthy	Active surveillance	Undefined	Adult	Household	with chicken	75	6	Illitarate	real-time RT-PCR	Negative	cELISA	Positive
473	473	Blood, Oropharyngeal swab and cloacal swabs	2016	Tanguar wetland	Dharmapasha	Sylhet	Bangladesh	Chattogram Veterinary and Animal Sciences University	Anas platyrhynchos domesticus	Domestic duck	Healthy	Active surveillance	Undefined	Adult	Household	with chicken	76	8	Illitarate	real-time RT-PCR	Negative	cELISA	Positive
474	474	Blood, Oropharyngeal swab and cloacal swabs	2016	Tanguar wetland	Dharmapasha	Sylhet	Bangladesh	Chattogram Veterinary and Animal Sciences University	Anas platyrhynchos domesticus	Domestic duck	Healthy	Active surveillance	Undefined	Adult	Household	with chicken	77	5	Illitarate	real-time RT-PCR	Negative	cELISA	Positive
475	475	Blood, Oropharyngeal swab and cloacal swabs	2016	Tanguar wetland	Dharmapasha	Sylhet	Bangladesh	Chattogram Veterinary and Animal Sciences University	Anas platyrhynchos domesticus	Domestic duck	Healthy	Active surveillance	Undefined	Adult	Household	without chicken	78	8	Illitarate	real-time RT-PCR	Negative	cELISA	Positive
476	476	Blood, Oropharyngeal swab and cloacal swabs	2016	Tanguar wetland	Dharmapasha	Sylhet	Bangladesh	Chattogram Veterinary and Animal Sciences University	Anas platyrhynchos domesticus	Domestic duck	Healthy	Active surveillance	Undefined	Adult	Household	without chicken	79	10	Illitarate	real-time RT-PCR	Negative	cELISA	Positive
477	477	Blood, Oropharyngeal swab and cloacal swabs	2016	Tanguar wetland	Tahirpur	Sylhet	Bangladesh	Chattogram Veterinary and Animal Sciences University	Anas platyrhynchos domesticus	Domestic duck	Healthy	Active surveillance	Undefined	Adult	Household	without chicken	80	5	Illitarate	real-time RT-PCR	Negative	cELISA	Positive
478	478	Blood, Oropharyngeal swab and cloacal swabs	2016	Tanguar wetland	Tahirpur	Sylhet	Bangladesh	Chattogram Veterinary and Animal Sciences University	Anas platyrhynchos domesticus	Domestic duck	Healthy	Active surveillance	Undefined	Adult	Household	without chicken	81	5	Illitarate	real-time RT-PCR	Negative	cELISA	Positive
479	479	Blood, Oropharyngeal swab and cloacal swabs	2016	Tanguar wetland	Tahirpur	Sylhet	Bangladesh	Chattogram Veterinary and Animal Sciences University	Anas platyrhynchos domesticus	Domestic duck	Healthy	Active surveillance	Undefined	Adult	Household	without chicken	82	7	Literate	real-time RT-PCR	Negative	cELISA	Positive
480	480	Blood, Oropharyngeal swab and cloacal swabs	2016	Tanguar wetland	Tahirpur	Sylhet	Bangladesh	Chattogram Veterinary and Animal Sciences University	Anas platyrhynchos domesticus	Domestic duck	Healthy	Active surveillance	Undefined	Adult	Household	without chicken	83	6	Literate	real-time RT-PCR	Negative	cELISA	Negative
481	481	Blood, Oropharyngeal swab and cloacal swabs	2016	Tanguar wetland	Tahirpur	Sylhet	Bangladesh	Chattogram Veterinary and Animal Sciences University	Anas platyrhynchos domesticus	Domestic duck	Healthy	Active surveillance	Undefined	Adult	Household	without chicken	84	8	Literate	real-time RT-PCR	Negative	cELISA	Positive
482	482	Blood, Oropharyngeal swab and cloacal swabs	2016	Tanguar wetland	Tahirpur	Sylhet	Bangladesh	Chattogram Veterinary and Animal Sciences University	Anas platyrhynchos domesticus	Domestic duck	Healthy	Active surveillance	Undefined	Adult	Household	without chicken	85	6	Literate	real-time RT-PCR	Negative	cELISA	Positive
483	483	Blood, Oropharyngeal swab and cloacal swabs	2016	Tanguar wetland	Tahirpur	Sylhet	Bangladesh	Chattogram Veterinary and Animal Sciences University	Anas platyrhynchos domesticus	Domestic duck	Healthy	Active surveillance	Undefined	Adult	Household	without chicken	86	9	Literate	real-time RT-PCR	Negative	cELISA	Positive
484	484	Blood, Oropharyngeal swab and cloacal swabs	2016	Tanguar wetland	Tahirpur	Sylhet	Bangladesh	Chattogram Veterinary and Animal Sciences University	Anas platyrhynchos domesticus	Domestic duck	Healthy	Active surveillance	Undefined	Adult	Household	without chicken	87	5	Illitarate	real-time RT-PCR	Negative	cELISA	Positive
485	485	Blood, Oropharyngeal swab and cloacal swabs	2016	Tanguar wetland	Tahirpur	Sylhet	Bangladesh	Chattogram Veterinary and Animal Sciences University	Anas platyrhynchos domesticus	Domestic duck	Healthy	Active surveillance	Undefined	Adult	Household	without chicken	88	7	Illitarate	real-time RT-PCR	Negative	cELISA	Negative
486	486	Blood, Oropharyngeal swab and cloacal swabs	2016	Tanguar wetland	Tahirpur	Sylhet	Bangladesh	Chattogram Veterinary and Animal Sciences University	Anas platyrhynchos domesticus	Domestic duck	Healthy	Active surveillance	Undefined	Adult	Household	without chicken	89	6	Illitarate	real-time RT-PCR	Negative	cELISA	Positive
487	487	Blood, Oropharyngeal swab and cloacal swabs	2016	Tanguar wetland	Tahirpur	Sylhet	Bangladesh	Chattogram Veterinary and Animal Sciences University	Anas platyrhynchos domesticus	Domestic duck	Healthy	Active surveillance	Undefined	Adult	Household	without chicken	90	9	Literate	real-time RT-PCR	Negative	cELISA	Negative
488	488	Blood, Oropharyngeal swab and cloacal swabs	2016	Tanguar wetland	Tahirpur	Sylhet	Bangladesh	Chattogram Veterinary and Animal Sciences University	Anas platyrhynchos domesticus	Domestic duck	Healthy	Active surveillance	Undefined	Adult	Household	without chicken	91	7	Literate	real-time RT-PCR	Negative	cELISA	Negative
489	489	Blood, Oropharyngeal swab and cloacal swabs	2016	Tanguar wetland	Tahirpur	Sylhet	Bangladesh	Chattogram Veterinary and Animal Sciences University	Anas platyrhynchos domesticus	Domestic duck	Healthy	Active surveillance	Undefined	Adult	Household	without chicken	92	5	Literate	real-time RT-PCR	Negative	cELISA	Negative
490	490	Blood, Oropharyngeal swab and cloacal swabs	2016	Tanguar wetland	Tahirpur	Sylhet	Bangladesh	Chattogram Veterinary and Animal Sciences University	Anas platyrhynchos domesticus	Domestic duck	Healthy	Active surveillance	Undefined	Adult	Household	with chicken	93	5	Literate	real-time RT-PCR	Negative	cELISA	Negative
491	491	Blood, Oropharyngeal swab and cloacal swabs	2016	Tanguar wetland	Tahirpur	Sylhet	Bangladesh	Chattogram Veterinary and Animal Sciences University	Anas platyrhynchos domesticus	Domestic duck	Healthy	Active surveillance	Undefined	Adult	Household	with chicken	94	9	Literate	real-time RT-PCR	Negative	cELISA	Negative
492	492	Blood, Oropharyngeal swab and cloacal swabs	2016	Tanguar wetland	Tahirpur	Sylhet	Bangladesh	Chattogram Veterinary and Animal Sciences University	Anas platyrhynchos domesticus	Domestic duck	Healthy	Active surveillance	Undefined	Adult	Household	with chicken	95	10	Literate	real-time RT-PCR	Negative	cELISA	Positive
493	493	Blood, Oropharyngeal swab and cloacal swabs	2016	Tanguar wetland	Tahirpur	Sylhet	Bangladesh	Chattogram Veterinary and Animal Sciences University	Anas platyrhynchos domesticus	Domestic duck	Healthy	Active surveillance	Undefined	Adult	Household	with chicken	96	14	Literate	real-time RT-PCR	Negative	cELISA	Positive
494	494	Blood, Oropharyngeal swab and cloacal swabs	2016	Tanguar wetland	Jamalganj	Sylhet	Bangladesh	Chattogram Veterinary and Animal Sciences University	Anas platyrhynchos domesticus	Domestic duck	Healthy	Active surveillance	Undefined	Adult	Free-range domestic	waterfowl	17	620	Literate	real-time RT-PCR	Negative	cELISA	Negative
495	495	Blood, Oropharyngeal swab and cloacal swabs	2016	Tanguar wetland	Jamalganj	Sylhet	Bangladesh	Chattogram Veterinary and Animal Sciences University	Anas platyrhynchos domesticus	Domestic duck	Healthy	Active surveillance	Undefined	Adult	Free-range domestic	waterfowl	17	620	Literate	real-time RT-PCR	Negative	cELISA	Negative
496	496	Blood, Oropharyngeal swab and cloacal swabs	2016	Tanguar wetland	Jamalganj	Sylhet	Bangladesh	Chattogram Veterinary and Animal Sciences University	Anas platyrhynchos domesticus	Domestic duck	Healthy	Active surveillance	Undefined	Adult	Free-range domestic	waterfowl	17	620	Literate	real-time RT-PCR	Negative	cELISA	Negative
497	497	Blood, Oropharyngeal swab and cloacal swabs	2016	Tanguar wetland	Jamalganj	Sylhet	Bangladesh	Chattogram Veterinary and Animal Sciences University	Anas platyrhynchos domesticus	Domestic duck	Healthy	Active surveillance	Undefined	Adult	Free-range domestic	waterfowl	17	620	Literate	real-time RT-PCR	Negative	cELISA	Negative
498	498	Blood, Oropharyngeal swab and cloacal swabs	2016	Tanguar wetland	Barhatta	Sylhet	Bangladesh	Chattogram Veterinary and Animal Sciences University	Anas platyrhynchos domesticus	Domestic duck	Healthy	Active surveillance	Undefined	Adult	Free-range domestic	waterfowl	18	467	Illitarate	real-time RT-PCR	Negative	cELISA	Negative
499	499	Blood, Oropharyngeal swab and cloacal swabs	2016	Tanguar wetland	Barhatta	Sylhet	Bangladesh	Chattogram Veterinary and Animal Sciences University	Anas platyrhynchos domesticus	Domestic duck	Healthy	Active surveillance	Undefined	Adult	Free-range domestic	waterfowl	18	467	Illitarate	real-time RT-PCR	Negative	cELISA	Positive
500	500	Blood, Oropharyngeal swab and cloacal swabs	2016	Tanguar wetland	Barhatta	Sylhet	Bangladesh	Chattogram Veterinary and Animal Sciences University	Anas platyrhynchos domesticus	Domestic duck	Healthy	Active surveillance	Undefined	Adult	Free-range domestic	waterfowl	18	467	Illitarate	real-time RT-PCR	Negative	cELISA	Negative
501	501	Blood, Oropharyngeal swab and cloacal swabs	2016	Tanguar wetland	Barhatta	Sylhet	Bangladesh	Chattogram Veterinary and Animal Sciences University	Anas platyrhynchos domesticus	Domestic duck	Healthy	Active surveillance	Undefined	Adult	Free-range domestic	waterfowl	18	467	Illitarate	real-time RT-PCR	Negative	cELISA	Positive
502	502	Blood, Oropharyngeal swab and cloacal swabs	2016	Tanguar wetland	Barhatta	Sylhet	Bangladesh	Chattogram Veterinary and Animal Sciences University	Anas platyrhynchos domesticus	Domestic duck	Healthy	Active surveillance	Undefined	Adult	Free-range domestic	waterfowl	18	467	Illitarate	real-time RT-PCR	Negative	cELISA	Positive
503	503	Blood, Oropharyngeal swab and cloacal swabs	2016	Tanguar wetland	Barhatta	Sylhet	Bangladesh	Chattogram Veterinary and Animal Sciences University	Anas platyrhynchos domesticus	Domestic duck	Healthy	Active surveillance	Undefined	Adult	Free-range domestic	waterfowl	19	390	Literate	real-time RT-PCR	Negative	cELISA	Positive
504	504	Blood, Oropharyngeal swab and cloacal swabs	2016	Tanguar wetland	Barhatta	Sylhet	Bangladesh	Chattogram Veterinary and Animal Sciences University	Anas platyrhynchos domesticus	Domestic duck	Healthy	Active surveillance	Undefined	Adult	Free-range domestic	waterfowl	19	390	Literate	real-time RT-PCR	Negative	cELISA	Positive
505	505	Blood, Oropharyngeal swab and cloacal swabs	2016	Tanguar wetland	Barhatta	Sylhet	Bangladesh	Chattogram Veterinary and Animal Sciences University	Anas platyrhynchos domesticus	Domestic duck	Healthy	Active surveillance	Undefined	Adult	Free-range domestic	waterfowl	19	390	Literate	real-time RT-PCR	Negative	cELISA	Negative
506	506	Blood, Oropharyngeal swab and cloacal swabs	2016	Tanguar wetland	Barhatta	Sylhet	Bangladesh	Chattogram Veterinary and Animal Sciences University	Anas platyrhynchos domesticus	Domestic duck	Healthy	Active surveillance	Undefined	Adult	Free-range domestic	waterfowl	19	390	Literate	real-time RT-PCR	Negative	cELISA	Negative
507	507	Blood, Oropharyngeal swab and cloacal swabs	2016	Tanguar wetland	Barhatta	Sylhet	Bangladesh	Chattogram Veterinary and Animal Sciences University	Anas platyrhynchos domesticus	Domestic duck	Healthy	Active surveillance	Undefined	Adult	Free-range domestic	waterfowl	19	390	Literate	real-time RT-PCR	Negative	cELISA	Negative
508	508	Blood, Oropharyngeal swab and cloacal swabs	2016	Tanguar wetland	Barhatta	Sylhet	Bangladesh	Chattogram Veterinary and Animal Sciences University	Anas platyrhynchos domesticus	Domestic duck	Healthy	Active surveillance	Undefined	Adult	Free-range domestic	waterfowl	20	509	Literate	real-time RT-PCR	Negative	cELISA	Negative
509	509	Blood, Oropharyngeal swab and cloacal swabs	2016	Tanguar wetland	Barhatta	Sylhet	Bangladesh	Chattogram Veterinary and Animal Sciences University	Anas platyrhynchos domesticus	Domestic duck	Healthy	Active surveillance	Undefined	Adult	Free-range domestic	waterfowl	20	509	Literate	real-time RT-PCR	Negative	cELISA	Negative
510	510	Blood, Oropharyngeal swab and cloacal swabs	2016	Tanguar wetland	Barhatta	Sylhet	Bangladesh	Chattogram Veterinary and Animal Sciences University	Anas platyrhynchos domesticus	Domestic duck	Healthy	Active surveillance	Undefined	Adult	Free-range domestic	waterfowl	20	509	Literate	real-time RT-PCR	Negative	cELISA	Negative
511	511	Blood, Oropharyngeal swab and cloacal swabs	2016	Tanguar wetland	Barhatta	Sylhet	Bangladesh	Chattogram Veterinary and Animal Sciences University	Anas platyrhynchos domesticus	Domestic duck	Healthy	Active surveillance	Undefined	Adult	Free-range domestic	waterfowl	20	509	Literate	real-time RT-PCR	Negative	cELISA	Negative
512	512	Blood, Oropharyngeal swab and cloacal swabs	2016	Tanguar wetland	Barhatta	Sylhet	Bangladesh	Chattogram Veterinary and Animal Sciences University	Anas platyrhynchos domesticus	Domestic duck	Healthy	Active surveillance	Undefined	Adult	Free-range domestic	waterfowl	20	509	Literate	real-time RT-PCR	Negative	cELISA	Negative
513	513	Blood, Oropharyngeal swab and cloacal swabs	2016	Hakaluki wetland	Jaifornagar	Sylhet	Bangladesh	Chattogram Veterinary and Animal Sciences University	Anas platyrhynchos domesticus	Domestic duck	Healthy	Active surveillance	Undefined	Adult	Household	without chicken	97	5	Illitarate	real-time RT-PCR	Negative	cELISA	Positive
514	514	Blood, Oropharyngeal swab and cloacal swabs	2016	Hakaluki wetland	Jaifornagar	Sylhet	Bangladesh	Chattogram Veterinary and Animal Sciences University	Anas platyrhynchos domesticus	Domestic duck	Healthy	Active surveillance	Undefined	Adult	Household	without chicken	98	8	Literate	real-time RT-PCR	Negative	cELISA	Negative
515	515	Blood, Oropharyngeal swab and cloacal swabs	2016	Hakaluki wetland	Jaifornagar	Sylhet	Bangladesh	Chattogram Veterinary and Animal Sciences University	Anas platyrhynchos domesticus	Domestic duck	Healthy	Active surveillance	Undefined	Adult	Household	without chicken	99	7	Literate	real-time RT-PCR	Negative	cELISA	Negative
516	516	Blood, Oropharyngeal swab and cloacal swabs	2016	Hakaluki wetland	Jaifornagar	Sylhet	Bangladesh	Chattogram Veterinary and Animal Sciences University	Anas platyrhynchos domesticus	Domestic duck	Healthy	Active surveillance	Undefined	Adult	Household	without chicken	100	9	Literate	real-time RT-PCR	Negative	cELISA	Negative
517	517	Blood, Oropharyngeal swab and cloacal swabs	2016	Hakaluki wetland	Jaifornagar	Sylhet	Bangladesh	Chattogram Veterinary and Animal Sciences University	Anas platyrhynchos domesticus	Domestic duck	Healthy	Active surveillance	Undefined	Adult	Household	without chicken	101	6	Literate	real-time RT-PCR	Negative	cELISA	Positive
518	518	Blood, Oropharyngeal swab and cloacal swabs	2016	Hakaluki wetland	Jaifornagar	Sylhet	Bangladesh	Chattogram Veterinary and Animal Sciences University	Anas platyrhynchos domesticus	Domestic duck	Healthy	Active surveillance	Undefined	Adult	Household	without chicken	102	8	Literate	real-time RT-PCR	Negative	cELISA	Positive
519	519	Blood, Oropharyngeal swab and cloacal swabs	2016	Hakaluki wetland	Jaifornagar	Sylhet	Bangladesh	Chattogram Veterinary and Animal Sciences University	Anas platyrhynchos domesticus	Domestic duck	Healthy	Active surveillance	Undefined	Adult	Household	without chicken	103	5	Literate	real-time RT-PCR	Negative	cELISA	Negative
520	520	Blood, Oropharyngeal swab and cloacal swabs	2016	Hakaluki wetland	Jaifornagar	Sylhet	Bangladesh	Chattogram Veterinary and Animal Sciences University	Anas platyrhynchos domesticus	Domestic duck	Healthy	Active surveillance	Undefined	Adult	Household	without chicken	104	7	Literate	real-time RT-PCR	Negative	cELISA	Negative
521	521	Blood, Oropharyngeal swab and cloacal swabs	2016	Hakaluki wetland	Jaifornagar	Sylhet	Bangladesh	Chattogram Veterinary and Animal Sciences University	Anas platyrhynchos domesticus	Domestic duck	Healthy	Active surveillance	Undefined	Adult	Household	with chicken	105	5	Literate	real-time RT-PCR	Negative	cELISA	Positive
522	522	Blood, Oropharyngeal swab and cloacal swabs	2016	Hakaluki wetland	Jaifornagar	Sylhet	Bangladesh	Chattogram Veterinary and Animal Sciences University	Anas platyrhynchos domesticus	Domestic duck	Healthy	Active surveillance	Undefined	Adult	Household	with chicken	106	6	Literate	real-time RT-PCR	Negative	cELISA	Positive
523	523	Blood, Oropharyngeal swab and cloacal swabs	2016	Hakaluki wetland	Jaifornagar	Sylhet	Bangladesh	Chattogram Veterinary and Animal Sciences University	Anas platyrhynchos domesticus	Domestic duck	Healthy	Active surveillance	Undefined	Adult	Household	with chicken	107	9	Illitarate	real-time RT-PCR	Negative	cELISA	Positive
524	524	Blood, Oropharyngeal swab and cloacal swabs	2016	Hakaluki wetland	Jaifornagar	Sylhet	Bangladesh	Chattogram Veterinary and Animal Sciences University	Anas platyrhynchos domesticus	Domestic duck	Healthy	Active surveillance	Undefined	Adult	Household	with chicken	108	7	Illitarate	real-time RT-PCR	Negative	cELISA	Positive
525	525	Blood, Oropharyngeal swab and cloacal swabs	2016	Hakaluki wetland	Jaifornagar	Sylhet	Bangladesh	Chattogram Veterinary and Animal Sciences University	Anas platyrhynchos domesticus	Domestic duck	Healthy	Active surveillance	Undefined	Adult	Household	with chicken	109	8	Literate	real-time RT-PCR	Negative	cELISA	Positive
526	526	Blood, Oropharyngeal swab and cloacal swabs	2016	Hakaluki wetland	Jaifornagar	Sylhet	Bangladesh	Chattogram Veterinary and Animal Sciences University	Anas platyrhynchos domesticus	Domestic duck	Healthy	Active surveillance	Undefined	Adult	Household	with chicken	110	9	Literate	real-time RT-PCR	Negative	cELISA	Negative
527	527	Blood, Oropharyngeal swab and cloacal swabs	2016	Hakaluki wetland	Jaifornagar	Sylhet	Bangladesh	Chattogram Veterinary and Animal Sciences University	Anas platyrhynchos domesticus	Domestic duck	Healthy	Active surveillance	Undefined	Adult	Household	without chicken	111	6	Literate	real-time RT-PCR	Negative	cELISA	Negative
528	528	Blood, Oropharyngeal swab and cloacal swabs	2016	Hakaluki wetland	Jaifornagar	Sylhet	Bangladesh	Chattogram Veterinary and Animal Sciences University	Anas platyrhynchos domesticus	Domestic duck	Healthy	Active surveillance	Undefined	Adult	Household	without chicken	112	7	Literate	real-time RT-PCR	Negative	cELISA	Negative
529	529	Blood, Oropharyngeal swab and cloacal swabs	2016	Hakaluki wetland	Jaifornagar	Sylhet	Bangladesh	Chattogram Veterinary and Animal Sciences University	Anas platyrhynchos domesticus	Domestic duck	Healthy	Active surveillance	Undefined	Adult	Household	with chicken	113	9	Literate	real-time RT-PCR	Negative	cELISA	Positive
530	530	Blood, Oropharyngeal swab and cloacal swabs	2016	Hakaluki wetland	Jaifornagar	Sylhet	Bangladesh	Chattogram Veterinary and Animal Sciences University	Anas platyrhynchos domesticus	Domestic duck	Healthy	Active surveillance	Undefined	Adult	Household	without chicken	114	8	Literate	real-time RT-PCR	Negative	cELISA	Negative
531	531	Blood, Oropharyngeal swab and cloacal swabs	2016	Hakaluki wetland	Jaifornagar	Sylhet	Bangladesh	Chattogram Veterinary and Animal Sciences University	Anas platyrhynchos domesticus	Domestic duck	Healthy	Active surveillance	Undefined	Adult	Household	without chicken	115	5	Literate	real-time RT-PCR	Negative	cELISA	Negative
532	532	Blood, Oropharyngeal swab and cloacal swabs	2016	Hakaluki wetland	Jaifornagar	Sylhet	Bangladesh	Chattogram Veterinary and Animal Sciences University	Anas platyrhynchos domesticus	Domestic duck	Healthy	Active surveillance	Undefined	Adult	Household	without chicken	116	7	Literate	real-time RT-PCR	Negative	cELISA	Negative
533	533	Blood, Oropharyngeal swab and cloacal swabs	2016	Hakaluki wetland	Jaifornagar	Sylhet	Bangladesh	Chattogram Veterinary and Animal Sciences University	Anas platyrhynchos domesticus	Domestic duck	Healthy	Active surveillance	Undefined	Adult	Household	without chicken	117	9	Literate	real-time RT-PCR	Negative	cELISA	Negative
534	534	Blood, Oropharyngeal swab and cloacal swabs	2016	Hakaluki wetland	Jaifornagar	Sylhet	Bangladesh	Chattogram Veterinary and Animal Sciences University	Anas platyrhynchos domesticus	Domestic duck	Healthy	Active surveillance	Undefined	Adult	Household	without chicken	118	11	Literate	real-time RT-PCR	Negative	cELISA	Positive
535	535	Blood, Oropharyngeal swab and cloacal swabs	2016	Hakaluki wetland	Jaifornagar	Sylhet	Bangladesh	Chattogram Veterinary and Animal Sciences University	Anas platyrhynchos domesticus	Domestic duck	Healthy	Active surveillance	Undefined	Adult	Household	without chicken	119	5	Literate	real-time RT-PCR	Negative	cELISA	Negative
536	536	Blood, Oropharyngeal swab and cloacal swabs	2016	Hakaluki wetland	Jaifornagar	Sylhet	Bangladesh	Chattogram Veterinary and Animal Sciences University	Anas platyrhynchos domesticus	Domestic duck	Healthy	Active surveillance	Undefined	Adult	Household	with chicken	120	6	Literate	real-time RT-PCR	Negative	cELISA	Negative
537	537	Blood, Oropharyngeal swab and cloacal swabs	2016	Hakaluki wetland	Jaifornagar	Sylhet	Bangladesh	Chattogram Veterinary and Animal Sciences University	Anas platyrhynchos domesticus	Domestic duck	Healthy	Active surveillance	Undefined	Adult	Household	with chicken	121	9	Literate	real-time RT-PCR	Negative	cELISA	Negative
538	538	Blood, Oropharyngeal swab and cloacal swabs	2016	Hakaluki wetland	Jaifornagar	Sylhet	Bangladesh	Chattogram Veterinary and Animal Sciences University	Anas platyrhynchos domesticus	Domestic duck	Healthy	Active surveillance	Undefined	Adult	Household	with chicken	122	5	Literate	real-time RT-PCR	Negative	cELISA	Negative
539	539	Blood, Oropharyngeal swab and cloacal swabs	2016	Hakaluki wetland	Jaifornagar	Sylhet	Bangladesh	Chattogram Veterinary and Animal Sciences University	Anas platyrhynchos domesticus	Domestic duck	Healthy	Active surveillance	Undefined	Adult	Household	with chicken	123	8	Literate	real-time RT-PCR	Negative	cELISA	Positive
540	540	Blood, Oropharyngeal swab and cloacal swabs	2016	Hakaluki wetland	Jaifornagar	Sylhet	Bangladesh	Chattogram Veterinary and Animal Sciences University	Anas platyrhynchos domesticus	Domestic duck	Healthy	Active surveillance	Undefined	Adult	Household	with chicken	124	5	Literate	real-time RT-PCR	Negative	cELISA	Positive
541	541	Blood, Oropharyngeal swab and cloacal swabs	2016	Hakaluki wetland	Jaifornagar	Sylhet	Bangladesh	Chattogram Veterinary and Animal Sciences University	Anas platyrhynchos domesticus	Domestic duck	Healthy	Active surveillance	Undefined	Adult	Household	with chicken	125	9	Literate	real-time RT-PCR	Negative	cELISA	Negative
542	542	Blood, Oropharyngeal swab and cloacal swabs	2016	Hakaluki wetland	Jaifornagar	Sylhet	Bangladesh	Chattogram Veterinary and Animal Sciences University	Anas platyrhynchos domesticus	Domestic duck	Healthy	Active surveillance	Undefined	Adult	Household	with chicken	126	5	Literate	real-time RT-PCR	Negative	cELISA	Positive
543	543	Blood, Oropharyngeal swab and cloacal swabs	2016	Hakaluki wetland	Jaifornagar	Sylhet	Bangladesh	Chattogram Veterinary and Animal Sciences University	Anas platyrhynchos domesticus	Domestic duck	Healthy	Active surveillance	Undefined	Adult	Household	without chicken	127	7	Literate	real-time RT-PCR	Negative	cELISA	Positive
544	544	Blood, Oropharyngeal swab and cloacal swabs	2016	Hakaluki wetland	Jaifornagar	Sylhet	Bangladesh	Chattogram Veterinary and Animal Sciences University	Anas platyrhynchos domesticus	Domestic duck	Healthy	Active surveillance	Undefined	Adult	Household	without chicken	128	6	Illitarate	real-time RT-PCR	Negative	cELISA	Positive
545	545	Blood, Oropharyngeal swab and cloacal swabs	2016	Hakaluki wetland	Jaifornagar	Sylhet	Bangladesh	Chattogram Veterinary and Animal Sciences University	Anas platyrhynchos domesticus	Domestic duck	Healthy	Active surveillance	Undefined	Adult	Household	without chicken	129	8	Illitarate	real-time RT-PCR	Negative	cELISA	Negative
546	546	Blood, Oropharyngeal swab and cloacal swabs	2016	Hakaluki wetland	Jaifornagar	Sylhet	Bangladesh	Chattogram Veterinary and Animal Sciences University	Anas platyrhynchos domesticus	Domestic duck	Healthy	Active surveillance	Undefined	Adult	Household	without chicken	130	9	Illitarate	real-time RT-PCR	Negative	cELISA	Positive
547	547	Blood, Oropharyngeal swab and cloacal swabs	2016	Hakaluki wetland	Kondupur	Sylhet	Bangladesh	Chattogram Veterinary and Animal Sciences University	Anas platyrhynchos domesticus	Domestic duck	Healthy	Active surveillance	Undefined	Adult	Household	without chicken	131	5	Illitarate	real-time RT-PCR	Negative	cELISA	Negative
548	548	Blood, Oropharyngeal swab and cloacal swabs	2016	Hakaluki wetland	Kondupur	Sylhet	Bangladesh	Chattogram Veterinary and Animal Sciences University	Anas platyrhynchos domesticus	Domestic duck	Healthy	Active surveillance	Undefined	Adult	Household	without chicken	132	8	Illitarate	real-time RT-PCR	Negative	cELISA	Negative
549	549	Blood, Oropharyngeal swab and cloacal swabs	2016	Hakaluki wetland	Kondupur	Sylhet	Bangladesh	Chattogram Veterinary and Animal Sciences University	Anas platyrhynchos domesticus	Domestic duck	Healthy	Active surveillance	Undefined	Adult	Household	without chicken	133	7	Illitarate	real-time RT-PCR	Negative	cELISA	Positive
550	550	Blood, Oropharyngeal swab and cloacal swabs	2016	Hakaluki wetland	Kondupur	Sylhet	Bangladesh	Chattogram Veterinary and Animal Sciences University	Anas platyrhynchos domesticus	Domestic duck	Healthy	Active surveillance	Undefined	Adult	Household	without chicken	134	6	Literate	real-time RT-PCR	Negative	cELISA	Positive
551	551	Blood, Oropharyngeal swab and cloacal swabs	2016	Hakaluki wetland	Kondupur	Sylhet	Bangladesh	Chattogram Veterinary and Animal Sciences University	Anas platyrhynchos domesticus	Domestic duck	Healthy	Active surveillance	Undefined	Adult	Household	without chicken	135	9	Literate	real-time RT-PCR	Negative	cELISA	Positive
552	552	Blood, Oropharyngeal swab and cloacal swabs	2016	Hakaluki wetland	Kondupur	Sylhet	Bangladesh	Chattogram Veterinary and Animal Sciences University	Anas platyrhynchos domesticus	Domestic duck	Healthy	Active surveillance	Undefined	Adult	Household	without chicken	136	6	Literate	real-time RT-PCR	Negative	cELISA	Negative
553	553	Blood, Oropharyngeal swab and cloacal swabs	2016	Hakaluki wetland	Kondupur	Sylhet	Bangladesh	Chattogram Veterinary and Animal Sciences University	Anas platyrhynchos domesticus	Domestic duck	Healthy	Active surveillance	Undefined	Adult	Household	without chicken	137	8	Illitarate	real-time RT-PCR	Negative	cELISA	Positive
554	554	Blood, Oropharyngeal swab and cloacal swabs	2016	Hakaluki wetland	Kondupur	Sylhet	Bangladesh	Chattogram Veterinary and Animal Sciences University	Anas platyrhynchos domesticus	Domestic duck	Healthy	Active surveillance	Undefined	Adult	Household	without chicken	138	7	Illitarate	real-time RT-PCR	Negative	cELISA	Positive
555	555	Blood, Oropharyngeal swab and cloacal swabs	2016	Hakaluki wetland	Kondupur	Sylhet	Bangladesh	Chattogram Veterinary and Animal Sciences University	Anas platyrhynchos domesticus	Domestic duck	Healthy	Active surveillance	Undefined	Adult	Household	without chicken	139	5	Illitarate	real-time RT-PCR	Negative	cELISA	Positive
556	556	Blood, Oropharyngeal swab and cloacal swabs	2016	Hakaluki wetland	Kondupur	Sylhet	Bangladesh	Chattogram Veterinary and Animal Sciences University	Anas platyrhynchos domesticus	Domestic duck	Healthy	Active surveillance	Undefined	Adult	Household	without chicken	140	7	Literate	real-time RT-PCR	Negative	cELISA	Positive
557	557	Blood, Oropharyngeal swab and cloacal swabs	2016	Tanguar wetland	Tahirpur	Sylhet	Bangladesh	Chattogram Veterinary and Animal Sciences University	Anas platyrhynchos domesticus	Domestic duck	Healthy	Active surveillance	Undefined	Adult	Household	with chicken	141	9	Literate	real-time RT-PCR	Negative	cELISA	Positive
558	558	Blood, Oropharyngeal swab and cloacal swabs	2016	Tanguar wetland	Tahirpur	Sylhet	Bangladesh	Chattogram Veterinary and Animal Sciences University	Anas platyrhynchos domesticus	Domestic duck	Healthy	Active surveillance	Undefined	Adult	Household	with chicken	142	6	Literate	real-time RT-PCR	Negative	cELISA	Positive
559	559	Blood, Oropharyngeal swab and cloacal swabs	2016	Tanguar wetland	Tahirpur	Sylhet	Bangladesh	Chattogram Veterinary and Animal Sciences University	Anas platyrhynchos domesticus	Domestic duck	Healthy	Active surveillance	Undefined	Adult	Household	with chicken	143	8	Illitarate	real-time RT-PCR	Negative	cELISA	Positive
560	560	Blood, Oropharyngeal swab and cloacal swabs	2016	Tanguar wetland	Tahirpur	Sylhet	Bangladesh	Chattogram Veterinary and Animal Sciences University	Anas platyrhynchos domesticus	Domestic duck	Healthy	Active surveillance	Undefined	Adult	Household	with chicken	144	5	Illitarate	real-time RT-PCR	Negative	cELISA	Positive
561	561	Blood, Oropharyngeal swab and cloacal swabs	2016	Tanguar wetland	Tahirpur	Sylhet	Bangladesh	Chattogram Veterinary and Animal Sciences University	Anas platyrhynchos domesticus	Domestic duck	Healthy	Active surveillance	Undefined	Adult	Household	with chicken	145	7	Illitarate	real-time RT-PCR	Negative	cELISA	Positive
562	562	Blood, Oropharyngeal swab and cloacal swabs	2016	Tanguar wetland	Tahirpur	Sylhet	Bangladesh	Chattogram Veterinary and Animal Sciences University	Anas platyrhynchos domesticus	Domestic duck	Healthy	Active surveillance	Undefined	Adult	Household	with chicken	146	8	Illitarate	real-time RT-PCR	Negative	cELISA	Positive
563	563	Blood, Oropharyngeal swab and cloacal swabs	2016	Tanguar wetland	Tahirpur	Sylhet	Bangladesh	Chattogram Veterinary and Animal Sciences University	Anas platyrhynchos domesticus	Domestic duck	Healthy	Active surveillance	Undefined	Adult	Household	with chicken	147	12	Illitarate	real-time RT-PCR	Negative	cELISA	Positive
564	564	Blood, Oropharyngeal swab and cloacal swabs	2016	Tanguar wetland	Tahirpur	Sylhet	Bangladesh	Chattogram Veterinary and Animal Sciences University	Anas platyrhynchos domesticus	Domestic duck	Healthy	Active surveillance	Undefined	Adult	Household	with chicken	148	11	Literate	real-time RT-PCR	Negative	cELISA	Positive
565	565	Blood, Oropharyngeal swab and cloacal swabs	2016	Tanguar wetland	Tahirpur	Sylhet	Bangladesh	Chattogram Veterinary and Animal Sciences University	Anas platyrhynchos domesticus	Domestic duck	Healthy	Active surveillance	Undefined	Adult	Household	with chicken	149	5	Literate	real-time RT-PCR	Negative	cELISA	Positive
566	566	Blood, Oropharyngeal swab and cloacal swabs	2016	Tanguar wetland	Tahirpur	Sylhet	Bangladesh	Chattogram Veterinary and Animal Sciences University	Anas platyrhynchos domesticus	Domestic duck	Healthy	Active surveillance	Undefined	Adult	Household	with chicken	150	8	Literate	real-time RT-PCR	Negative	cELISA	Positive
567	567	Blood, Oropharyngeal swab and cloacal swabs	2016	Tanguar wetland	Tahirpur	Sylhet	Bangladesh	Chattogram Veterinary and Animal Sciences University	Anas platyrhynchos domesticus	Domestic duck	Healthy	Active surveillance	Undefined	Adult	Household	with chicken	151	6	Literate	real-time RT-PCR	Negative	cELISA	Positive
568	568	Blood, Oropharyngeal swab and cloacal swabs	2016	Tanguar wetland	Tahirpur	Sylhet	Bangladesh	Chattogram Veterinary and Animal Sciences University	Anas platyrhynchos domesticus	Domestic duck	Healthy	Active surveillance	Undefined	Adult	Household	with chicken	152	9	Literate	real-time RT-PCR	Negative	cELISA	Positive
569	569	Blood, Oropharyngeal swab and cloacal swabs	2016	Tanguar wetland	Tahirpur	Sylhet	Bangladesh	Chattogram Veterinary and Animal Sciences University	Anas platyrhynchos domesticus	Domestic duck	Healthy	Active surveillance	Undefined	Adult	Household	without chicken	153	6	Literate	real-time RT-PCR	Negative	cELISA	Positive
570	570	Blood, Oropharyngeal swab and cloacal swabs	2016	Tanguar wetland	Tahirpur	Sylhet	Bangladesh	Chattogram Veterinary and Animal Sciences University	Anas platyrhynchos domesticus	Domestic duck	Healthy	Active surveillance	Undefined	Adult	Household	without chicken	154	8	Literate	real-time RT-PCR	Negative	cELISA	Positive
571	571	Blood, Oropharyngeal swab and cloacal swabs	2016	Tanguar wetland	Tahirpur	Sylhet	Bangladesh	Chattogram Veterinary and Animal Sciences University	Anas platyrhynchos domesticus	Domestic duck	Healthy	Active surveillance	Undefined	Adult	Household	without chicken	155	5	Illitarate	real-time RT-PCR	Negative	cELISA	Positive
572	572	Blood, Oropharyngeal swab and cloacal swabs	2016	Tanguar wetland	Tahirpur	Sylhet	Bangladesh	Chattogram Veterinary and Animal Sciences University	Anas platyrhynchos domesticus	Domestic duck	Healthy	Active surveillance	Undefined	Adult	Household	without chicken	156	7	Illitarate	real-time RT-PCR	Negative	cELISA	Positive
573	573	Blood, Oropharyngeal swab and cloacal swabs	2016	Tanguar wetland	Tahirpur	Sylhet	Bangladesh	Chattogram Veterinary and Animal Sciences University	Anas platyrhynchos domesticus	Domestic duck	Healthy	Active surveillance	Undefined	Adult	Household	with chicken	157	6	Illitarate	real-time RT-PCR	Negative	cELISA	Positive
574	574	Blood, Oropharyngeal swab and cloacal swabs	2016	Tanguar wetland	Tahirpur	Sylhet	Bangladesh	Chattogram Veterinary and Animal Sciences University	Anas platyrhynchos domesticus	Domestic duck	Healthy	Active surveillance	Undefined	Adult	Household	with chicken	158	8	Illitarate	real-time RT-PCR	Negative	cELISA	Positive
575	575	Blood, Oropharyngeal swab and cloacal swabs	2016	Tanguar wetland	Tahirpur	Sylhet	Bangladesh	Chattogram Veterinary and Animal Sciences University	Anas platyrhynchos domesticus	Domestic duck	Healthy	Active surveillance	Undefined	Adult	Household	with chicken	159	6	Illitarate	real-time RT-PCR	Negative	cELISA	Positive
576	576	Blood, Oropharyngeal swab and cloacal swabs	2016	Tanguar wetland	Tahirpur	Sylhet	Bangladesh	Chattogram Veterinary and Animal Sciences University	Anas platyrhynchos domesticus	Domestic duck	Healthy	Active surveillance	Undefined	Adult	Household	with chicken	160	9	Illitarate	real-time RT-PCR	Negative	cELISA	Positive
577	577	Blood, Oropharyngeal swab and cloacal swabs	2016	Tanguar wetland	Kalmakanda	Sylhet	Bangladesh	Chattogram Veterinary and Animal Sciences University	Anas platyrhynchos domesticus	Domestic duck	Healthy	Active surveillance	Undefined	Adult	Household	with chicken	161	7	Illitarate	real-time RT-PCR	Negative	cELISA	Positive
578	578	Blood, Oropharyngeal swab and cloacal swabs	2016	Tanguar wetland	Kalmakanda	Sylhet	Bangladesh	Chattogram Veterinary and Animal Sciences University	Anas platyrhynchos domesticus	Domestic duck	Healthy	Active surveillance	Undefined	Adult	Household	with chicken	162	9	Illitarate	real-time RT-PCR	Negative	cELISA	Positive
579	579	Blood, Oropharyngeal swab and cloacal swabs	2016	Tanguar wetland	Kalmakanda	Sylhet	Bangladesh	Chattogram Veterinary and Animal Sciences University	Anas platyrhynchos domesticus	Domestic duck	Healthy	Active surveillance	Undefined	Adult	Household	with chicken	163	5	Illitarate	real-time RT-PCR	Negative	cELISA	Positive
580	580	Blood, Oropharyngeal swab and cloacal swabs	2016	Tanguar wetland	Kalmakanda	Sylhet	Bangladesh	Chattogram Veterinary and Animal Sciences University	Anas platyrhynchos domesticus	Domestic duck	Healthy	Active surveillance	Undefined	Adult	Household	with chicken	164	6	Literate	real-time RT-PCR	Negative	cELISA	Positive
581	581	Blood, Oropharyngeal swab and cloacal swabs	2016	Tanguar wetland	Kalmakanda	Sylhet	Bangladesh	Chattogram Veterinary and Animal Sciences University	Anas platyrhynchos domesticus	Domestic duck	Healthy	Active surveillance	Undefined	Adult	Household	with chicken	165	7	Literate	real-time RT-PCR	Negative	cELISA	Positive
582	582	Blood, Oropharyngeal swab and cloacal swabs	2016	Tanguar wetland	Kalmakanda	Sylhet	Bangladesh	Chattogram Veterinary and Animal Sciences University	Anas platyrhynchos domesticus	Domestic duck	Healthy	Active surveillance	Undefined	Adult	Household	with chicken	166	9	Literate	real-time RT-PCR	Negative	cELISA	Positive
583	583	Blood, Oropharyngeal swab and cloacal swabs	2016	Tanguar wetland	Kalmakanda	Sylhet	Bangladesh	Chattogram Veterinary and Animal Sciences University	Anas platyrhynchos domesticus	Domestic duck	Healthy	Active surveillance	Undefined	Adult	Household	without chicken	167	6	Literate	real-time RT-PCR	Negative	cELISA	Positive
584	584	Blood, Oropharyngeal swab and cloacal swabs	2016	Tanguar wetland	Kalmakanda	Sylhet	Bangladesh	Chattogram Veterinary and Animal Sciences University	Anas platyrhynchos domesticus	Domestic duck	Healthy	Active surveillance	Undefined	Adult	Household	without chicken	168	7	Illitarate	real-time RT-PCR	Negative	cELISA	Positive
585	585	Blood, Oropharyngeal swab and cloacal swabs	2016	Tanguar wetland	Kalmakanda	Sylhet	Bangladesh	Chattogram Veterinary and Animal Sciences University	Anas platyrhynchos domesticus	Domestic duck	Healthy	Active surveillance	Undefined	Adult	Household	without chicken	169	8	Illitarate	real-time RT-PCR	Negative	cELISA	Positive
586	586	Blood, Oropharyngeal swab and cloacal swabs	2016	Tanguar wetland	Kalmakanda	Sylhet	Bangladesh	Chattogram Veterinary and Animal Sciences University	Anas platyrhynchos domesticus	Domestic duck	Healthy	Active surveillance	Undefined	Adult	Household	without chicken	170	5	Illitarate	real-time RT-PCR	Negative	cELISA	Positive
587	587	Blood, Oropharyngeal swab and cloacal swabs	2016	Tanguar wetland	Kalmakanda	Sylhet	Bangladesh	Chattogram Veterinary and Animal Sciences University	Anas platyrhynchos domesticus	Domestic duck	Healthy	Active surveillance	Undefined	Adult	Household	without chicken	171	7	Illitarate	real-time RT-PCR	Negative	cELISA	Positive
588	588	Blood, Oropharyngeal swab and cloacal swabs	2016	Tanguar wetland	Kalmakanda	Sylhet	Bangladesh	Chattogram Veterinary and Animal Sciences University	Anas platyrhynchos domesticus	Domestic duck	Healthy	Active surveillance	Undefined	Adult	Household	without chicken	172	5	Literate	real-time RT-PCR	Negative	cELISA	Negative
589	589	Blood, Oropharyngeal swab and cloacal swabs	2016	Tanguar wetland	Kalmakanda	Sylhet	Bangladesh	Chattogram Veterinary and Animal Sciences University	Anas platyrhynchos domesticus	Domestic duck	Healthy	Active surveillance	Undefined	Adult	Household	without chicken	173	10	Literate	real-time RT-PCR	Negative	cELISA	Positive
590	590	Blood, Oropharyngeal swab and cloacal swabs	2016	Tanguar wetland	Kalmakanda	Sylhet	Bangladesh	Chattogram Veterinary and Animal Sciences University	Anas platyrhynchos domesticus	Domestic duck	Healthy	Active surveillance	Undefined	Adult	Household	without chicken	174	7	Literate	real-time RT-PCR	Negative	cELISA	Positive
591	591	Blood, Oropharyngeal swab and cloacal swabs	2016	Tanguar wetland	Kalmakanda	Sylhet	Bangladesh	Chattogram Veterinary and Animal Sciences University	Anas platyrhynchos domesticus	Domestic duck	Healthy	Active surveillance	Undefined	Adult	Household	without chicken	175	8	Literate	real-time RT-PCR	Negative	cELISA	Positive
592	592	Blood, Oropharyngeal swab and cloacal swabs	2016	Tanguar wetland	Kalmakanda	Sylhet	Bangladesh	Chattogram Veterinary and Animal Sciences University	Anas platyrhynchos domesticus	Domestic duck	Healthy	Active surveillance	Undefined	Adult	Household	without chicken	176	5	Literate	real-time RT-PCR	Negative	cELISA	Positive
593	593	Blood, Oropharyngeal swab and cloacal swabs	2016	Tanguar wetland	Kalmakanda	Sylhet	Bangladesh	Chattogram Veterinary and Animal Sciences University	Anas platyrhynchos domesticus	Domestic duck	Healthy	Active surveillance	Undefined	Adult	Household	without chicken	177	9	Literate	real-time RT-PCR	Negative	cELISA	Negative
594	594	Blood, Oropharyngeal swab and cloacal swabs	2016	Tanguar wetland	Kalmakanda	Sylhet	Bangladesh	Chattogram Veterinary and Animal Sciences University	Anas platyrhynchos domesticus	Domestic duck	Healthy	Active surveillance	Undefined	Adult	Household	without chicken	178	5	Literate	real-time RT-PCR	Negative	cELISA	Positive
595	595	Blood, Oropharyngeal swab and cloacal swabs	2016	Tanguar wetland	Kalmakanda	Sylhet	Bangladesh	Chattogram Veterinary and Animal Sciences University	Anas platyrhynchos domesticus	Domestic duck	Healthy	Active surveillance	Undefined	Adult	Household	without chicken	179	7	Literate	real-time RT-PCR	Negative	cELISA	Negative
596	596	Blood, Oropharyngeal swab and cloacal swabs	2016	Tanguar wetland	Kalmakanda	Sylhet	Bangladesh	Chattogram Veterinary and Animal Sciences University	Anas platyrhynchos domesticus	Domestic duck	Healthy	Active surveillance	Undefined	Adult	Household	without chicken	180	9	Literate	real-time RT-PCR	Negative	cELISA	Negative
597	597	Blood, Oropharyngeal swab and cloacal swabs	2016	Tanguar wetland	Kalmakanda	Sylhet	Bangladesh	Chattogram Veterinary and Animal Sciences University	Anas platyrhynchos domesticus	Domestic duck	Healthy	Active surveillance	Undefined	Adult	Household	without chicken	181	6	Literate	real-time RT-PCR	Negative	cELISA	Negative
598	598	Blood, Oropharyngeal swab and cloacal swabs	2016	Tanguar wetland	Kalmakanda	Sylhet	Bangladesh	Chattogram Veterinary and Animal Sciences University	Anas platyrhynchos domesticus	Domestic duck	Healthy	Active surveillance	Undefined	Adult	Household	with chicken	182	8	Literate	real-time RT-PCR	Negative	cELISA	Negative
599	599	Blood, Oropharyngeal swab and cloacal swabs	2016	Tanguar wetland	Kalmakanda	Sylhet	Bangladesh	Chattogram Veterinary and Animal Sciences University	Anas platyrhynchos domesticus	Domestic duck	Healthy	Active surveillance	Undefined	Adult	Household	with chicken	183	5	Literate	real-time RT-PCR	Negative	cELISA	Negative
600	600	Blood, Oropharyngeal swab and cloacal swabs	2016	Tanguar wetland	Kalmakanda	Sylhet	Bangladesh	Chattogram Veterinary and Animal Sciences University	Anas platyrhynchos domesticus	Domestic duck	Healthy	Active surveillance	Undefined	Adult	Household	with chicken	184	8	Illitarate	real-time RT-PCR	Negative	cELISA	Positive
601	601	Blood, Oropharyngeal swab and cloacal swabs	2016	Tanguar wetland	Kalmakanda	Sylhet	Bangladesh	Chattogram Veterinary and Animal Sciences University	Anas platyrhynchos domesticus	Domestic duck	Healthy	Active surveillance	Undefined	Adult	Household	with chicken	185	6	Illitarate	real-time RT-PCR	Negative	cELISA	Positive
602	602	Blood, Oropharyngeal swab and cloacal swabs	2016	Hakaluki wetland	Kondupur	Sylhet	Bangladesh	Chattogram Veterinary and Animal Sciences University	Anas platyrhynchos domesticus	Domestic duck	Healthy	Active surveillance	Undefined	Adult	Household	with chicken	186	9	Literate	real-time RT-PCR	Positive	cELISA	Negative
603	603	Blood, Oropharyngeal swab and cloacal swabs	2016	Hakaluki wetland	Kondupur	Sylhet	Bangladesh	Chattogram Veterinary and Animal Sciences University	Anas platyrhynchos domesticus	Domestic duck	Healthy	Active surveillance	Undefined	Adult	Household	with chicken	187	5	Literate	real-time RT-PCR	Positive	cELISA	Positive
604	604	Blood, Oropharyngeal swab and cloacal swabs	2016	Hakaluki wetland	Kondupur	Sylhet	Bangladesh	Chattogram Veterinary and Animal Sciences University	Anas platyrhynchos domesticus	Domestic duck	Healthy	Active surveillance	Undefined	Adult	Household	with chicken	188	8	Literate	real-time RT-PCR	Positive	cELISA	Negative
605	605	Blood, Oropharyngeal swab and cloacal swabs	2016	Hakaluki wetland	Kondupur	Sylhet	Bangladesh	Chattogram Veterinary and Animal Sciences University	Anas platyrhynchos domesticus	Domestic duck	Healthy	Active surveillance	Undefined	Adult	Household	with chicken	189	6	Literate	real-time RT-PCR	Positive	cELISA	Positive
606	606	Blood, Oropharyngeal swab and cloacal swabs	2016	Hakaluki wetland	Kondupur	Sylhet	Bangladesh	Chattogram Veterinary and Animal Sciences University	Anas platyrhynchos domesticus	Domestic duck	Healthy	Active surveillance	Undefined	Adult	Household	with chicken	190	9	Literate	real-time RT-PCR	Positive	cELISA	Negative
607	607	Blood, Oropharyngeal swab and cloacal swabs	2016	Hakaluki wetland	Kondupur	Sylhet	Bangladesh	Chattogram Veterinary and Animal Sciences University	Anas platyrhynchos domesticus	Domestic duck	Healthy	Active surveillance	Undefined	Adult	Household	with chicken	191	7	Literate	real-time RT-PCR	Positive	cELISA	Negative
608	608	Blood, Oropharyngeal swab and cloacal swabs	2016	Tanguar wetland	Kalmakanda	Sylhet	Bangladesh	Chattogram Veterinary and Animal Sciences University	Anas platyrhynchos domesticus	Domestic duck	Healthy	Active surveillance	Undefined	Adult	Free-range domestic	waterfowl	21	850	Illitarate	real-time RT-PCR	Positive	cELISA	Positive
609	609	Blood, Oropharyngeal swab and cloacal swabs	2016	Tanguar wetland	Kalmakanda	Sylhet	Bangladesh	Chattogram Veterinary and Animal Sciences University	Anas platyrhynchos domesticus	Domestic duck	Healthy	Active surveillance	Undefined	Adult	Free-range domestic	waterfowl	21	850	Illitarate	real-time RT-PCR	Positive	cELISA	Positive
610	610	Blood, Oropharyngeal swab and cloacal swabs	2016	Tanguar wetland	Kalmakanda	Sylhet	Bangladesh	Chattogram Veterinary and Animal Sciences University	Anas platyrhynchos domesticus	Domestic duck	Healthy	Active surveillance	Undefined	Adult	Free-range domestic	waterfowl	21	850	Illitarate	real-time RT-PCR	Positive	cELISA	Negative
611	611	Blood, Oropharyngeal swab and cloacal swabs	2016	Tanguar wetland	Kalmakanda	Sylhet	Bangladesh	Chattogram Veterinary and Animal Sciences University	Anas platyrhynchos domesticus	Domestic duck	Healthy	Active surveillance	Undefined	Adult	Free-range domestic	waterfowl	21	850	Illitarate	real-time RT-PCR	Positive	cELISA	Negative
612	612	Blood, Oropharyngeal swab and cloacal swabs	2016	Tanguar wetland	Kalmakanda	Sylhet	Bangladesh	Chattogram Veterinary and Animal Sciences University	Anas platyrhynchos domesticus	Domestic duck	Healthy	Active surveillance	Undefined	Adult	Free-range domestic	waterfowl	21	850	Illitarate	real-time RT-PCR	Positive	cELISA	Negative
613	613	Blood, Oropharyngeal swab and cloacal swabs	2016	Tanguar wetland	Kalmakanda	Sylhet	Bangladesh	Chattogram Veterinary and Animal Sciences University	Anas platyrhynchos domesticus	Domestic duck	Healthy	Active surveillance	Undefined	Adult	Free-range domestic	waterfowl	21	850	Illitarate	real-time RT-PCR	Positive	cELISA	Positive
614	614	Blood, Oropharyngeal swab and cloacal swabs	2016	Tanguar wetland	Kalmakanda	Sylhet	Bangladesh	Chattogram Veterinary and Animal Sciences University	Anas platyrhynchos domesticus	Domestic duck	Healthy	Active surveillance	Undefined	Adult	Free-range domestic	waterfowl	21	850	Illitarate	real-time RT-PCR	Positive	cELISA	Positive
615	615	Blood, Oropharyngeal swab and cloacal swabs	2016	Tanguar wetland	Barhatta	Sylhet	Bangladesh	Chattogram Veterinary and Animal Sciences University	Anas platyrhynchos domesticus	Domestic duck	Healthy	Active surveillance	Undefined	Adult	Household	with chicken	192	9	Illitarate	real-time RT-PCR	Positive	cELISA	Positive
616	616	Blood, Oropharyngeal swab and cloacal swabs	2016	Tanguar wetland	Barhatta	Sylhet	Bangladesh	Chattogram Veterinary and Animal Sciences University	Anas platyrhynchos domesticus	Domestic duck	Healthy	Active surveillance	Undefined	Adult	Household	with chicken	193	7	Literate	real-time RT-PCR	Positive	cELISA	Positive
617	617	Blood, Oropharyngeal swab and cloacal swabs	2016	Tanguar wetland	Barhatta	Sylhet	Bangladesh	Chattogram Veterinary and Animal Sciences University	Anas platyrhynchos domesticus	Domestic duck	Healthy	Active surveillance	Undefined	Adult	Household	with chicken	194	10	Literate	real-time RT-PCR	Positive	cELISA	Positive
618	618	Blood, Oropharyngeal swab and cloacal swabs	2016	Tanguar wetland	Barhatta	Sylhet	Bangladesh	Chattogram Veterinary and Animal Sciences University	Anas platyrhynchos domesticus	Domestic duck	Healthy	Active surveillance	Undefined	Adult	Household	with chicken	195	7	Illitarate	real-time RT-PCR	Positive	cELISA	Positive
619	619	Blood, Oropharyngeal swab and cloacal swabs	2016	Tanguar wetland	Barhatta	Sylhet	Bangladesh	Chattogram Veterinary and Animal Sciences University	Anas platyrhynchos domesticus	Domestic duck	Healthy	Active surveillance	Undefined	Adult	Household	with chicken	196	5	Literate	real-time RT-PCR	Positive	cELISA	Positive
620	620	Blood, Oropharyngeal swab and cloacal swabs	2016	Hakaluki wetland	Kondupur	Sylhet	Bangladesh	Chattogram Veterinary and Animal Sciences University	Anas platyrhynchos domesticus	Domestic duck	Healthy	Active surveillance	Undefined	Adult	Household	with chicken	197	8	Illitarate	real-time RT-PCR	Positive	cELISA	Negative
621	621	Blood, Oropharyngeal swab and cloacal swabs	2016	Hakaluki wetland	Kondupur	Sylhet	Bangladesh	Chattogram Veterinary and Animal Sciences University	Anas platyrhynchos domesticus	Domestic duck	Healthy	Active surveillance	Undefined	Adult	Household	with chicken	198	5	Illitarate	real-time RT-PCR	Positive	cELISA	Positive
622	622	Blood, Oropharyngeal swab and cloacal swabs	2016	Hakaluki wetland	Kondupur	Sylhet	Bangladesh	Chattogram Veterinary and Animal Sciences University	Anas platyrhynchos domesticus	Domestic duck	Healthy	Active surveillance	Undefined	Adult	Household	with chicken	199	9	Illitarate	real-time RT-PCR	Positive	cELISA	Negative
623	623	Blood, Oropharyngeal swab and cloacal swabs	2016	Hakaluki wetland	Kondupur	Sylhet	Bangladesh	Chattogram Veterinary and Animal Sciences University	Anas platyrhynchos domesticus	Domestic duck	Healthy	Active surveillance	Undefined	Adult	Household	with chicken	200	5	Illitarate	real-time RT-PCR	Positive	cELISA	Positive
624	624	Blood, Oropharyngeal swab and cloacal swabs	2016	Hakaluki wetland	Kondupur	Sylhet	Bangladesh	Chattogram Veterinary and Animal Sciences University	Anas platyrhynchos domesticus	Domestic duck	Healthy	Active surveillance	Undefined	Adult	Household	with chicken	201	8	Illitarate	real-time RT-PCR	Positive	cELISA	Negative
625	625	Blood, Oropharyngeal swab and cloacal swabs	2016	Hakaluki wetland	Kondupur	Sylhet	Bangladesh	Chattogram Veterinary and Animal Sciences University	Anas platyrhynchos domesticus	Domestic duck	Healthy	Active surveillance	Undefined	Adult	Household	with chicken	202	6	Literate	real-time RT-PCR	Positive	cELISA	Negative
626	626	Blood, Oropharyngeal swab and cloacal swabs	2016	Tanguar wetland	Barhatta	Sylhet	Bangladesh	Chattogram Veterinary and Animal Sciences University	Anas platyrhynchos domesticus	Domestic duck	Healthy	Active surveillance	Undefined	Adult	Household	with chicken	203	9	Literate	real-time RT-PCR	Positive	cELISA	Positive
627	627	Blood, Oropharyngeal swab and cloacal swabs	2016	Tanguar wetland	Barhatta	Sylhet	Bangladesh	Chattogram Veterinary and Animal Sciences University	Anas platyrhynchos domesticus	Domestic duck	Healthy	Active surveillance	Undefined	Adult	Household	with chicken	204	5	Literate	real-time RT-PCR	Positive	cELISA	Positive
628	628	Blood, Oropharyngeal swab and cloacal swabs	2016	Tanguar wetland	Barhatta	Sylhet	Bangladesh	Chattogram Veterinary and Animal Sciences University	Anas platyrhynchos domesticus	Domestic duck	Healthy	Active surveillance	Undefined	Adult	Household	with chicken	205	7	Literate	real-time RT-PCR	Positive	cELISA	Positive
629	629	Blood, Oropharyngeal swab and cloacal swabs	2016	Tanguar wetland	Barhatta	Sylhet	Bangladesh	Chattogram Veterinary and Animal Sciences University	Anas platyrhynchos domesticus	Domestic duck	Healthy	Active surveillance	Undefined	Adult	Household	with chicken	206	9	Literate	real-time RT-PCR	Positive	cELISA	Positive
630	630	Blood, Oropharyngeal swab and cloacal swabs	2016	Tanguar wetland	Barhatta	Sylhet	Bangladesh	Chattogram Veterinary and Animal Sciences University	Anas platyrhynchos domesticus	Domestic duck	Healthy	Active surveillance	Undefined	Adult	Household	with chicken	207	5	Literate	real-time RT-PCR	Positive	cELISA	Positive
631	631	Blood, Oropharyngeal swab and cloacal swabs	2017	Hakaluki wetland	Bhatera	Sylhet	Bangladesh	Chattogram Veterinary and Animal Sciences University	Anas platyrhynchos domesticus	Domestic duck	Healthy	Active surveillance	Undefined	Adult	Free-range domestic	waterfowl	1	370	Illitarate	real-time RT-PCR	Negative	cELISA	Positive
632	632	Blood, Oropharyngeal swab and cloacal swabs	2017	Hakaluki wetland	Bhatera	Sylhet	Bangladesh	Chattogram Veterinary and Animal Sciences University	Anas platyrhynchos domesticus	Domestic duck	Healthy	Active surveillance	Undefined	Adult	Free-range domestic	waterfowl	1	370	Illitarate	real-time RT-PCR	Negative	cELISA	Positive
633	633	Blood, Oropharyngeal swab and cloacal swabs	2017	Hakaluki wetland	Bhatera	Sylhet	Bangladesh	Chattogram Veterinary and Animal Sciences University	Anas platyrhynchos domesticus	Domestic duck	Healthy	Active surveillance	Undefined	Adult	Free-range domestic	waterfowl	1	370	Illitarate	real-time RT-PCR	Negative	cELISA	Positive
634	634	Blood, Oropharyngeal swab and cloacal swabs	2017	Hakaluki wetland	Bhatera	Sylhet	Bangladesh	Chattogram Veterinary and Animal Sciences University	Anas platyrhynchos domesticus	Domestic duck	Healthy	Active surveillance	Undefined	Adult	Free-range domestic	waterfowl	1	370	Illitarate	real-time RT-PCR	Negative	cELISA	Positive
635	635	Blood, Oropharyngeal swab and cloacal swabs	2017	Hakaluki wetland	Bhatera	Sylhet	Bangladesh	Chattogram Veterinary and Animal Sciences University	Anas platyrhynchos domesticus	Domestic duck	Healthy	Active surveillance	Undefined	Adult	Free-range domestic	waterfowl	1	370	Illitarate	real-time RT-PCR	Negative	cELISA	Positive
636	636	Blood, Oropharyngeal swab and cloacal swabs	2017	Hakaluki wetland	Bhatera	Sylhet	Bangladesh	Chattogram Veterinary and Animal Sciences University	Anas platyrhynchos domesticus	Domestic duck	Healthy	Active surveillance	Undefined	Adult	Free-range domestic	waterfowl	2	320	Literate	real-time RT-PCR	Negative	cELISA	Negative
637	637	Blood, Oropharyngeal swab and cloacal swabs	2017	Hakaluki wetland	Bhatera	Sylhet	Bangladesh	Chattogram Veterinary and Animal Sciences University	Anas platyrhynchos domesticus	Domestic duck	Healthy	Active surveillance	Undefined	Adult	Free-range domestic	waterfowl	2	320	Literate	real-time RT-PCR	Negative	cELISA	Positive
638	638	Blood, Oropharyngeal swab and cloacal swabs	2017	Hakaluki wetland	Bhatera	Sylhet	Bangladesh	Chattogram Veterinary and Animal Sciences University	Anas platyrhynchos domesticus	Domestic duck	Healthy	Active surveillance	Undefined	Adult	Free-range domestic	waterfowl	2	320	Literate	real-time RT-PCR	Negative	cELISA	Positive
639	639	Blood, Oropharyngeal swab and cloacal swabs	2017	Hakaluki wetland	Bhatera	Sylhet	Bangladesh	Chattogram Veterinary and Animal Sciences University	Anas platyrhynchos domesticus	Domestic duck	Healthy	Active surveillance	Undefined	Adult	Free-range domestic	waterfowl	2	320	Literate	real-time RT-PCR	Negative	cELISA	Positive
640	640	Blood, Oropharyngeal swab and cloacal swabs	2017	Hakaluki wetland	Bhatera	Sylhet	Bangladesh	Chattogram Veterinary and Animal Sciences University	Anas platyrhynchos domesticus	Domestic duck	Healthy	Active surveillance	Undefined	Adult	Free-range domestic	waterfowl	2	320	Literate	real-time RT-PCR	Negative	cELISA	Positive
641	641	Blood, Oropharyngeal swab and cloacal swabs	2017	Hakaluki wetland	Bhatera	Sylhet	Bangladesh	Chattogram Veterinary and Animal Sciences University	Anas platyrhynchos domesticus	Domestic duck	Healthy	Active surveillance	Undefined	Adult	Free-range domestic	waterfowl	3	400	Literate	real-time RT-PCR	Negative	cELISA	Negative
642	642	Blood, Oropharyngeal swab and cloacal swabs	2017	Hakaluki wetland	Bhatera	Sylhet	Bangladesh	Chattogram Veterinary and Animal Sciences University	Anas platyrhynchos domesticus	Domestic duck	Healthy	Active surveillance	Undefined	Adult	Free-range domestic	waterfowl	3	400	Literate	real-time RT-PCR	Negative	cELISA	Positive
643	643	Blood, Oropharyngeal swab and cloacal swabs	2017	Hakaluki wetland	Bhatera	Sylhet	Bangladesh	Chattogram Veterinary and Animal Sciences University	Anas platyrhynchos domesticus	Domestic duck	Healthy	Active surveillance	Undefined	Adult	Free-range domestic	waterfowl	3	400	Literate	real-time RT-PCR	Negative	cELISA	Positive
644	644	Blood, Oropharyngeal swab and cloacal swabs	2017	Hakaluki wetland	Bhatera	Sylhet	Bangladesh	Chattogram Veterinary and Animal Sciences University	Anas platyrhynchos domesticus	Domestic duck	Healthy	Active surveillance	Undefined	Adult	Free-range domestic	waterfowl	3	400	Literate	real-time RT-PCR	Negative	cELISA	Negative
645	645	Blood, Oropharyngeal swab and cloacal swabs	2017	Hakaluki wetland	Bhatera	Sylhet	Bangladesh	Chattogram Veterinary and Animal Sciences University	Anas platyrhynchos domesticus	Domestic duck	Healthy	Active surveillance	Undefined	Adult	Free-range domestic	waterfowl	3	400	Literate	real-time RT-PCR	Negative	cELISA	Negative
646	646	Blood, Oropharyngeal swab and cloacal swabs	2017	Hakaluki wetland	Bhatera	Sylhet	Bangladesh	Chattogram Veterinary and Animal Sciences University	Anas platyrhynchos domesticus	Domestic duck	Healthy	Active surveillance	Undefined	Adult	Free-range domestic	waterfowl	4	540	Literate	real-time RT-PCR	Negative	cELISA	Positive
647	647	Blood, Oropharyngeal swab and cloacal swabs	2017	Hakaluki wetland	Bhatera	Sylhet	Bangladesh	Chattogram Veterinary and Animal Sciences University	Anas platyrhynchos domesticus	Domestic duck	Healthy	Active surveillance	Undefined	Adult	Free-range domestic	waterfowl	4	540	Literate	real-time RT-PCR	Negative	cELISA	Positive
648	648	Blood, Oropharyngeal swab and cloacal swabs	2017	Hakaluki wetland	Bhatera	Sylhet	Bangladesh	Chattogram Veterinary and Animal Sciences University	Anas platyrhynchos domesticus	Domestic duck	Healthy	Active surveillance	Undefined	Adult	Free-range domestic	waterfowl	4	540	Literate	real-time RT-PCR	Negative	cELISA	Negative
649	649	Blood, Oropharyngeal swab and cloacal swabs	2017	Hakaluki wetland	Bhatera	Sylhet	Bangladesh	Chattogram Veterinary and Animal Sciences University	Anas platyrhynchos domesticus	Domestic duck	Healthy	Active surveillance	Undefined	Adult	Household	without chicken	1	7	Literate	real-time RT-PCR	Negative	cELISA	Positive
650	650	Blood, Oropharyngeal swab and cloacal swabs	2017	Hakaluki wetland	Bhatera	Sylhet	Bangladesh	Chattogram Veterinary and Animal Sciences University	Anas platyrhynchos domesticus	Domestic duck	Healthy	Active surveillance	Undefined	Adult	Household	without chicken	2	6	Literate	real-time RT-PCR	Negative	cELISA	Negative
651	651	Blood, Oropharyngeal swab and cloacal swabs	2017	Hakaluki wetland	Bhatera	Sylhet	Bangladesh	Chattogram Veterinary and Animal Sciences University	Anas platyrhynchos domesticus	Domestic duck	Healthy	Active surveillance	Undefined	Adult	Household	without chicken	3	9	Illitarate	real-time RT-PCR	Negative	cELISA	Negative
652	652	Blood, Oropharyngeal swab and cloacal swabs	2017	Hakaluki wetland	Bhatera	Sylhet	Bangladesh	Chattogram Veterinary and Animal Sciences University	Anas platyrhynchos domesticus	Domestic duck	Healthy	Active surveillance	Undefined	Adult	Household	without chicken	4	10	Illitarate	real-time RT-PCR	Negative	cELISA	Negative
653	653	Blood, Oropharyngeal swab and cloacal swabs	2017	Hakaluki wetland	Bhatera	Sylhet	Bangladesh	Chattogram Veterinary and Animal Sciences University	Anas platyrhynchos domesticus	Domestic duck	Healthy	Active surveillance	Undefined	Adult	Household	without chicken	5	8	Illitarate	real-time RT-PCR	Negative	cELISA	Positive
654	654	Blood, Oropharyngeal swab and cloacal swabs	2017	Hakaluki wetland	Bhatera	Sylhet	Bangladesh	Chattogram Veterinary and Animal Sciences University	Anas platyrhynchos domesticus	Domestic duck	Healthy	Active surveillance	Undefined	Adult	Household	without chicken	6	6	Literate	real-time RT-PCR	Negative	cELISA	Positive
655	655	Blood, Oropharyngeal swab and cloacal swabs	2017	Hakaluki wetland	Bhatera	Sylhet	Bangladesh	Chattogram Veterinary and Animal Sciences University	Anas platyrhynchos domesticus	Domestic duck	Healthy	Active surveillance	Undefined	Adult	Household	without chicken	7	5	Literate	real-time RT-PCR	Negative	cELISA	Negative
656	656	Blood, Oropharyngeal swab and cloacal swabs	2017	Hakaluki wetland	Bhatera	Sylhet	Bangladesh	Chattogram Veterinary and Animal Sciences University	Anas platyrhynchos domesticus	Domestic duck	Healthy	Active surveillance	Undefined	Adult	Household	without chicken	8	8	Illitarate	real-time RT-PCR	Negative	cELISA	Negative
657	657	Blood, Oropharyngeal swab and cloacal swabs	2017	Hakaluki wetland	Bhatera	Sylhet	Bangladesh	Chattogram Veterinary and Animal Sciences University	Anas platyrhynchos domesticus	Domestic duck	Healthy	Active surveillance	Undefined	Adult	Household	with chicken	9	6	Illitarate	real-time RT-PCR	Negative	cELISA	Positive
658	658	Blood, Oropharyngeal swab and cloacal swabs	2017	Hakaluki wetland	Bhatera	Sylhet	Bangladesh	Chattogram Veterinary and Animal Sciences University	Anas platyrhynchos domesticus	Domestic duck	Healthy	Active surveillance	Undefined	Adult	Household	with chicken	10	9	Illitarate	real-time RT-PCR	Negative	cELISA	Positive
659	659	Blood, Oropharyngeal swab and cloacal swabs	2017	Hakaluki wetland	Bhatera	Sylhet	Bangladesh	Chattogram Veterinary and Animal Sciences University	Anas platyrhynchos domesticus	Domestic duck	Healthy	Active surveillance	Undefined	Adult	Household	with chicken	11	5	Literate	real-time RT-PCR	Negative	cELISA	Positive
660	660	Blood, Oropharyngeal swab and cloacal swabs	2017	Hakaluki wetland	Bhatera	Sylhet	Bangladesh	Chattogram Veterinary and Animal Sciences University	Anas platyrhynchos domesticus	Domestic duck	Healthy	Active surveillance	Undefined	Adult	Household	with chicken	12	8	Literate	real-time RT-PCR	Negative	cELISA	Positive
661	661	Blood, Oropharyngeal swab and cloacal swabs	2017	Hakaluki wetland	Bhatera	Sylhet	Bangladesh	Chattogram Veterinary and Animal Sciences University	Anas platyrhynchos domesticus	Domestic duck	Healthy	Active surveillance	Undefined	Adult	Household	with chicken	13	5	Literate	real-time RT-PCR	Negative	cELISA	Positive
662	662	Blood, Oropharyngeal swab and cloacal swabs	2017	Hakaluki wetland	Bhatera	Sylhet	Bangladesh	Chattogram Veterinary and Animal Sciences University	Anas platyrhynchos domesticus	Domestic duck	Healthy	Active surveillance	Undefined	Adult	Household	with chicken	14	7	Literate	real-time RT-PCR	Negative	cELISA	Negative
663	663	Blood, Oropharyngeal swab and cloacal swabs	2017	Hakaluki wetland	Bhatera	Sylhet	Bangladesh	Chattogram Veterinary and Animal Sciences University	Anas platyrhynchos domesticus	Domestic duck	Healthy	Active surveillance	Undefined	Adult	Household	without chicken	15	6	Literate	real-time RT-PCR	Negative	cELISA	Negative
664	664	Blood, Oropharyngeal swab and cloacal swabs	2017	Hakaluki wetland	Bhatera	Sylhet	Bangladesh	Chattogram Veterinary and Animal Sciences University	Anas platyrhynchos domesticus	Domestic duck	Healthy	Active surveillance	Undefined	Adult	Household	without chicken	16	8	Literate	real-time RT-PCR	Negative	cELISA	Negative
665	665	Blood, Oropharyngeal swab and cloacal swabs	2017	Hakaluki wetland	Bhatera	Sylhet	Bangladesh	Chattogram Veterinary and Animal Sciences University	Anas platyrhynchos domesticus	Domestic duck	Healthy	Active surveillance	Undefined	Adult	Household	with chicken	17	5	Literate	real-time RT-PCR	Negative	cELISA	Positive
666	666	Blood, Oropharyngeal swab and cloacal swabs	2017	Hakaluki wetland	Bhatera	Sylhet	Bangladesh	Chattogram Veterinary and Animal Sciences University	Anas platyrhynchos domesticus	Domestic duck	Healthy	Active surveillance	Undefined	Adult	Household	without chicken	18	7	Literate	real-time RT-PCR	Negative	cELISA	Negative
667	667	Blood, Oropharyngeal swab and cloacal swabs	2017	Hakaluki wetland	Bhatera	Sylhet	Bangladesh	Chattogram Veterinary and Animal Sciences University	Anas platyrhynchos domesticus	Domestic duck	Healthy	Active surveillance	Undefined	Adult	Household	without chicken	19	9	Literate	real-time RT-PCR	Negative	cELISA	Negative
668	668	Blood, Oropharyngeal swab and cloacal swabs	2017	Hakaluki wetland	Baramchal	Sylhet	Bangladesh	Chattogram Veterinary and Animal Sciences University	Anas platyrhynchos domesticus	Domestic duck	Healthy	Active surveillance	Undefined	Adult	Household	without chicken	20	6	Literate	real-time RT-PCR	Negative	cELISA	Negative
669	669	Blood, Oropharyngeal swab and cloacal swabs	2017	Hakaluki wetland	Baramchal	Sylhet	Bangladesh	Chattogram Veterinary and Animal Sciences University	Anas platyrhynchos domesticus	Domestic duck	Healthy	Active surveillance	Undefined	Adult	Household	without chicken	21	10	Literate	real-time RT-PCR	Negative	cELISA	Negative
670	670	Blood, Oropharyngeal swab and cloacal swabs	2017	Hakaluki wetland	Baramchal	Sylhet	Bangladesh	Chattogram Veterinary and Animal Sciences University	Anas platyrhynchos domesticus	Domestic duck	Healthy	Active surveillance	Undefined	Adult	Household	without chicken	22	11	Literate	real-time RT-PCR	Negative	cELISA	Positive
671	671	Blood, Oropharyngeal swab and cloacal swabs	2017	Hakaluki wetland	Baramchal	Sylhet	Bangladesh	Chattogram Veterinary and Animal Sciences University	Anas platyrhynchos domesticus	Domestic duck	Healthy	Active surveillance	Undefined	Adult	Household	without chicken	23	7	Literate	real-time RT-PCR	Negative	cELISA	Negative
672	672	Blood, Oropharyngeal swab and cloacal swabs	2017	Hakaluki wetland	Baramchal	Sylhet	Bangladesh	Chattogram Veterinary and Animal Sciences University	Anas platyrhynchos domesticus	Domestic duck	Healthy	Active surveillance	Undefined	Adult	Household	with chicken	24	5	Literate	real-time RT-PCR	Negative	cELISA	Negative
673	673	Blood, Oropharyngeal swab and cloacal swabs	2017	Hakaluki wetland	Baramchal	Sylhet	Bangladesh	Chattogram Veterinary and Animal Sciences University	Anas platyrhynchos domesticus	Domestic duck	Healthy	Active surveillance	Undefined	Adult	Household	with chicken	25	8	Illitarate	real-time RT-PCR	Negative	cELISA	Negative
674	674	Blood, Oropharyngeal swab and cloacal swabs	2017	Hakaluki wetland	Baramchal	Sylhet	Bangladesh	Chattogram Veterinary and Animal Sciences University	Anas platyrhynchos domesticus	Domestic duck	Healthy	Active surveillance	Undefined	Adult	Household	with chicken	26	5	Illitarate	real-time RT-PCR	Negative	cELISA	Negative
675	675	Blood, Oropharyngeal swab and cloacal swabs	2017	Hakaluki wetland	Baramchal	Sylhet	Bangladesh	Chattogram Veterinary and Animal Sciences University	Anas platyrhynchos domesticus	Domestic duck	Healthy	Active surveillance	Undefined	Adult	Household	with chicken	27	9	Illitarate	real-time RT-PCR	Negative	cELISA	Positive
676	676	Blood, Oropharyngeal swab and cloacal swabs	2017	Hakaluki wetland	Baramchal	Sylhet	Bangladesh	Chattogram Veterinary and Animal Sciences University	Anas platyrhynchos domesticus	Domestic duck	Healthy	Active surveillance	Undefined	Adult	Household	with chicken	28	6	Illitarate	real-time RT-PCR	Negative	cELISA	Positive
677	677	Blood, Oropharyngeal swab and cloacal swabs	2017	Hakaluki wetland	Baramchal	Sylhet	Bangladesh	Chattogram Veterinary and Animal Sciences University	Anas platyrhynchos domesticus	Domestic duck	Healthy	Active surveillance	Undefined	Adult	Household	with chicken	29	9	Illitarate	real-time RT-PCR	Negative	cELISA	Negative
678	678	Blood, Oropharyngeal swab and cloacal swabs	2017	Hakaluki wetland	Baramchal	Sylhet	Bangladesh	Chattogram Veterinary and Animal Sciences University	Anas platyrhynchos domesticus	Domestic duck	Healthy	Active surveillance	Undefined	Adult	Household	with chicken	30	7	Illitarate	real-time RT-PCR	Negative	cELISA	Positive
679	679	Blood, Oropharyngeal swab and cloacal swabs	2017	Hakaluki wetland	Baramchal	Sylhet	Bangladesh	Chattogram Veterinary and Animal Sciences University	Anas platyrhynchos domesticus	Domestic duck	Healthy	Active surveillance	Undefined	Adult	Household	without chicken	31	8	Illitarate	real-time RT-PCR	Negative	cELISA	Positive
680	680	Blood, Oropharyngeal swab and cloacal swabs	2017	Hakaluki wetland	Baramchal	Sylhet	Bangladesh	Chattogram Veterinary and Animal Sciences University	Anas platyrhynchos domesticus	Domestic duck	Healthy	Active surveillance	Undefined	Adult	Household	without chicken	32	5	Illitarate	real-time RT-PCR	Negative	cELISA	Positive
681	681	Blood, Oropharyngeal swab and cloacal swabs	2017	Hakaluki wetland	Baramchal	Sylhet	Bangladesh	Chattogram Veterinary and Animal Sciences University	Anas platyrhynchos domesticus	Domestic duck	Healthy	Active surveillance	Undefined	Adult	Household	without chicken	33	8	Illitarate	real-time RT-PCR	Negative	cELISA	Negative
682	682	Blood, Oropharyngeal swab and cloacal swabs	2017	Hakaluki wetland	Baramchal	Sylhet	Bangladesh	Chattogram Veterinary and Animal Sciences University	Anas platyrhynchos domesticus	Domestic duck	Healthy	Active surveillance	Undefined	Adult	Household	without chicken	34	7	Literate	real-time RT-PCR	Negative	cELISA	Positive
683	683	Blood, Oropharyngeal swab and cloacal swabs	2017	Hakaluki wetland	Baramchal	Sylhet	Bangladesh	Chattogram Veterinary and Animal Sciences University	Anas platyrhynchos domesticus	Domestic duck	Healthy	Active surveillance	Undefined	Adult	Household	without chicken	35	10	Literate	real-time RT-PCR	Negative	cELISA	Negative
684	684	Blood, Oropharyngeal swab and cloacal swabs	2017	Hakaluki wetland	Baramchal	Sylhet	Bangladesh	Chattogram Veterinary and Animal Sciences University	Anas platyrhynchos domesticus	Domestic duck	Healthy	Active surveillance	Undefined	Adult	Household	without chicken	36	7	Literate	real-time RT-PCR	Negative	cELISA	Negative
685	685	Blood, Oropharyngeal swab and cloacal swabs	2017	Hakaluki wetland	Baramchal	Sylhet	Bangladesh	Chattogram Veterinary and Animal Sciences University	Anas platyrhynchos domesticus	Domestic duck	Healthy	Active surveillance	Undefined	Adult	Household	without chicken	37	5	Literate	real-time RT-PCR	Negative	cELISA	Positive
686	686	Blood, Oropharyngeal swab and cloacal swabs	2017	Hakaluki wetland	Baramchal	Sylhet	Bangladesh	Chattogram Veterinary and Animal Sciences University	Anas platyrhynchos domesticus	Domestic duck	Healthy	Active surveillance	Undefined	Adult	Household	without chicken	38	7	Illitarate	real-time RT-PCR	Negative	cELISA	Positive
687	687	Blood, Oropharyngeal swab and cloacal swabs	2017	Hakaluki wetland	Baramchal	Sylhet	Bangladesh	Chattogram Veterinary and Animal Sciences University	Anas platyrhynchos domesticus	Domestic duck	Healthy	Active surveillance	Undefined	Adult	Household	without chicken	39	6	Illitarate	real-time RT-PCR	Negative	cELISA	Positive
688	688	Blood, Oropharyngeal swab and cloacal swabs	2017	Hakaluki wetland	Baramchal	Sylhet	Bangladesh	Chattogram Veterinary and Animal Sciences University	Anas platyrhynchos domesticus	Domestic duck	Healthy	Active surveillance	Undefined	Adult	Household	without chicken	40	9	Illitarate	real-time RT-PCR	Negative	cELISA	Negative
689	689	Blood, Oropharyngeal swab and cloacal swabs	2017	Hakaluki wetland	Shekpur	Sylhet	Bangladesh	Chattogram Veterinary and Animal Sciences University	Anas platyrhynchos domesticus	Domestic duck	Healthy	Active surveillance	Undefined	Adult	Household	without chicken	41	5	Literate	real-time RT-PCR	Negative	cELISA	Positive
690	690	Blood, Oropharyngeal swab and cloacal swabs	2017	Hakaluki wetland	Shekpur	Sylhet	Bangladesh	Chattogram Veterinary and Animal Sciences University	Anas platyrhynchos domesticus	Domestic duck	Healthy	Active surveillance	Undefined	Adult	Household	without chicken	42	8	Literate	real-time RT-PCR	Negative	cELISA	Positive
691	691	Blood, Oropharyngeal swab and cloacal swabs	2017	Hakaluki wetland	Shekpur	Sylhet	Bangladesh	Chattogram Veterinary and Animal Sciences University	Anas platyrhynchos domesticus	Domestic duck	Healthy	Active surveillance	Undefined	Adult	Household	without chicken	43	7	Literate	real-time RT-PCR	Negative	cELISA	Positive
692	692	Blood, Oropharyngeal swab and cloacal swabs	2017	Hakaluki wetland	Shekpur	Sylhet	Bangladesh	Chattogram Veterinary and Animal Sciences University	Anas platyrhynchos domesticus	Domestic duck	Healthy	Active surveillance	Undefined	Adult	Household	without chicken	44	9	Literate	real-time RT-PCR	Negative	cELISA	Positive
693	693	Blood, Oropharyngeal swab and cloacal swabs	2017	Hakaluki wetland	Bhatera	Sylhet	Bangladesh	Chattogram Veterinary and Animal Sciences University	Anas platyrhynchos domesticus	Domestic duck	Healthy	Active surveillance	Undefined	Adult	Free-range domestic	waterfowl	4	540	Literate	real-time RT-PCR	Negative	cELISA	Positive
694	694	Blood, Oropharyngeal swab and cloacal swabs	2017	Hakaluki wetland	Bhatera	Sylhet	Bangladesh	Chattogram Veterinary and Animal Sciences University	Anas platyrhynchos domesticus	Domestic duck	Healthy	Active surveillance	Undefined	Adult	Free-range domestic	waterfowl	4	540	Literate	real-time RT-PCR	Negative	cELISA	Positive
695	695	Blood, Oropharyngeal swab and cloacal swabs	2017	Hakaluki wetland	Shekpur	Sylhet	Bangladesh	Chattogram Veterinary and Animal Sciences University	Anas platyrhynchos domesticus	Domestic duck	Healthy	Active surveillance	Undefined	Adult	Free-range domestic	waterfowl	5	320	Illitarate	real-time RT-PCR	Negative	cELISA	Negative
696	696	Blood, Oropharyngeal swab and cloacal swabs	2017	Hakaluki wetland	Shekpur	Sylhet	Bangladesh	Chattogram Veterinary and Animal Sciences University	Anas platyrhynchos domesticus	Domestic duck	Healthy	Active surveillance	Undefined	Adult	Free-range domestic	waterfowl	5	320	Illitarate	real-time RT-PCR	Negative	cELISA	Positive
697	697	Blood, Oropharyngeal swab and cloacal swabs	2017	Hakaluki wetland	Shekpur	Sylhet	Bangladesh	Chattogram Veterinary and Animal Sciences University	Anas platyrhynchos domesticus	Domestic duck	Healthy	Active surveillance	Undefined	Adult	Free-range domestic	waterfowl	5	320	Illitarate	real-time RT-PCR	Negative	cELISA	Positive
698	698	Blood, Oropharyngeal swab and cloacal swabs	2017	Hakaluki wetland	Shekpur	Sylhet	Bangladesh	Chattogram Veterinary and Animal Sciences University	Anas platyrhynchos domesticus	Domestic duck	Healthy	Active surveillance	Undefined	Adult	Free-range domestic	waterfowl	5	320	Illitarate	real-time RT-PCR	Negative	cELISA	Positive
699	699	Blood, Oropharyngeal swab and cloacal swabs	2017	Hakaluki wetland	Shekpur	Sylhet	Bangladesh	Chattogram Veterinary and Animal Sciences University	Anas platyrhynchos domesticus	Domestic duck	Healthy	Active surveillance	Undefined	Adult	Free-range domestic	waterfowl	5	320	Illitarate	real-time RT-PCR	Negative	cELISA	Positive
700	700	Blood, Oropharyngeal swab and cloacal swabs	2017	Hakaluki wetland	Shekpur	Sylhet	Bangladesh	Chattogram Veterinary and Animal Sciences University	Anas platyrhynchos domesticus	Domestic duck	Healthy	Active surveillance	Undefined	Adult	Free-range domestic	waterfowl	6	430	Literate	real-time RT-PCR	Negative	cELISA	Positive
701	701	Blood, Oropharyngeal swab and cloacal swabs	2017	Hakaluki wetland	Shekpur	Sylhet	Bangladesh	Chattogram Veterinary and Animal Sciences University	Anas platyrhynchos domesticus	Domestic duck	Healthy	Active surveillance	Undefined	Adult	Free-range domestic	waterfowl	6	430	Literate	real-time RT-PCR	Negative	cELISA	Positive
702	702	Blood, Oropharyngeal swab and cloacal swabs	2017	Hakaluki wetland	Shekpur	Sylhet	Bangladesh	Chattogram Veterinary and Animal Sciences University	Anas platyrhynchos domesticus	Domestic duck	Healthy	Active surveillance	Undefined	Adult	Free-range domestic	waterfowl	6	430	Literate	real-time RT-PCR	Negative	cELISA	Positive
703	703	Blood, Oropharyngeal swab and cloacal swabs	2017	Hakaluki wetland	Shekpur	Sylhet	Bangladesh	Chattogram Veterinary and Animal Sciences University	Anas platyrhynchos domesticus	Domestic duck	Healthy	Active surveillance	Undefined	Adult	Free-range domestic	waterfowl	6	430	Literate	real-time RT-PCR	Negative	cELISA	Positive
704	704	Blood, Oropharyngeal swab and cloacal swabs	2017	Hakaluki wetland	Shekpur	Sylhet	Bangladesh	Chattogram Veterinary and Animal Sciences University	Anas platyrhynchos domesticus	Domestic duck	Healthy	Active surveillance	Undefined	Adult	Free-range domestic	waterfowl	6	430	Literate	real-time RT-PCR	Negative	cELISA	Negative
705	705	Blood, Oropharyngeal swab and cloacal swabs	2017	Hakaluki wetland	Kondupur	Sylhet	Bangladesh	Chattogram Veterinary and Animal Sciences University	Anas platyrhynchos domesticus	Domestic duck	Healthy	Active surveillance	Undefined	Adult	Free-range domestic	waterfowl	7	355	Literate	real-time RT-PCR	Negative	cELISA	Negative
706	706	Blood, Oropharyngeal swab and cloacal swabs	2017	Hakaluki wetland	Kondupur	Sylhet	Bangladesh	Chattogram Veterinary and Animal Sciences University	Anas platyrhynchos domesticus	Domestic duck	Healthy	Active surveillance	Undefined	Adult	Free-range domestic	waterfowl	7	355	Literate	real-time RT-PCR	Negative	cELISA	Positive
707	707	Blood, Oropharyngeal swab and cloacal swabs	2017	Hakaluki wetland	Kondupur	Sylhet	Bangladesh	Chattogram Veterinary and Animal Sciences University	Anas platyrhynchos domesticus	Domestic duck	Healthy	Active surveillance	Undefined	Adult	Free-range domestic	waterfowl	7	355	Literate	real-time RT-PCR	Negative	cELISA	Positive
708	708	Blood, Oropharyngeal swab and cloacal swabs	2017	Hakaluki wetland	Kondupur	Sylhet	Bangladesh	Chattogram Veterinary and Animal Sciences University	Anas platyrhynchos domesticus	Domestic duck	Healthy	Active surveillance	Undefined	Adult	Free-range domestic	waterfowl	7	355	Literate	real-time RT-PCR	Negative	cELISA	Positive
709	709	Blood, Oropharyngeal swab and cloacal swabs	2017	Hakaluki wetland	Kondupur	Sylhet	Bangladesh	Chattogram Veterinary and Animal Sciences University	Anas platyrhynchos domesticus	Domestic duck	Healthy	Active surveillance	Undefined	Adult	Free-range domestic	waterfowl	7	355	Literate	real-time RT-PCR	Negative	cELISA	Positive
710	710	Blood, Oropharyngeal swab and cloacal swabs	2017	Hakaluki wetland	Kondupur	Sylhet	Bangladesh	Chattogram Veterinary and Animal Sciences University	Anas platyrhynchos domesticus	Domestic duck	Healthy	Active surveillance	Undefined	Adult	Free-range domestic	waterfowl	8	700	Literate	real-time RT-PCR	Negative	cELISA	Positive
711	711	Blood, Oropharyngeal swab and cloacal swabs	2017	Hakaluki wetland	Kondupur	Sylhet	Bangladesh	Chattogram Veterinary and Animal Sciences University	Anas platyrhynchos domesticus	Domestic duck	Healthy	Active surveillance	Undefined	Adult	Free-range domestic	waterfowl	8	700	Literate	real-time RT-PCR	Negative	cELISA	Negative
712	712	Blood, Oropharyngeal swab and cloacal swabs	2017	Hakaluki wetland	Kondupur	Sylhet	Bangladesh	Chattogram Veterinary and Animal Sciences University	Anas platyrhynchos domesticus	Domestic duck	Healthy	Active surveillance	Undefined	Adult	Free-range domestic	waterfowl	8	700	Literate	real-time RT-PCR	Negative	cELISA	Positive
713	713	Blood, Oropharyngeal swab and cloacal swabs	2017	Hakaluki wetland	Kondupur	Sylhet	Bangladesh	Chattogram Veterinary and Animal Sciences University	Anas platyrhynchos domesticus	Domestic duck	Healthy	Active surveillance	Undefined	Adult	Free-range domestic	waterfowl	8	700	Literate	real-time RT-PCR	Negative	cELISA	Negative
714	714	Blood, Oropharyngeal swab and cloacal swabs	2017	Hakaluki wetland	Kondupur	Sylhet	Bangladesh	Chattogram Veterinary and Animal Sciences University	Anas platyrhynchos domesticus	Domestic duck	Healthy	Active surveillance	Undefined	Adult	Free-range domestic	waterfowl	8	700	Literate	real-time RT-PCR	Negative	cELISA	Negative
715	715	Blood, Oropharyngeal swab and cloacal swabs	2017	Hakaluki wetland	Kondupur	Sylhet	Bangladesh	Chattogram Veterinary and Animal Sciences University	Anas platyrhynchos domesticus	Domestic duck	Healthy	Active surveillance	Undefined	Adult	Free-range domestic	waterfowl	9	430	Literate	real-time RT-PCR	Negative	cELISA	Negative
716	716	Blood, Oropharyngeal swab and cloacal swabs	2017	Hakaluki wetland	Kondupur	Sylhet	Bangladesh	Chattogram Veterinary and Animal Sciences University	Anas platyrhynchos domesticus	Domestic duck	Healthy	Active surveillance	Undefined	Adult	Free-range domestic	waterfowl	9	430	Literate	real-time RT-PCR	Negative	cELISA	Negative
717	717	Blood, Oropharyngeal swab and cloacal swabs	2017	Hakaluki wetland	Kondupur	Sylhet	Bangladesh	Chattogram Veterinary and Animal Sciences University	Anas platyrhynchos domesticus	Domestic duck	Healthy	Active surveillance	Undefined	Adult	Free-range domestic	waterfowl	9	430	Literate	real-time RT-PCR	Negative	cELISA	Negative
718	718	Blood, Oropharyngeal swab and cloacal swabs	2017	Hakaluki wetland	Kondupur	Sylhet	Bangladesh	Chattogram Veterinary and Animal Sciences University	Anas platyrhynchos domesticus	Domestic duck	Healthy	Active surveillance	Undefined	Adult	Free-range domestic	waterfowl	9	430	Literate	real-time RT-PCR	Negative	cELISA	Negative
719	719	Blood, Oropharyngeal swab and cloacal swabs	2017	Hakaluki wetland	Kondupur	Sylhet	Bangladesh	Chattogram Veterinary and Animal Sciences University	Anas platyrhynchos domesticus	Domestic duck	Healthy	Active surveillance	Undefined	Adult	Free-range domestic	waterfowl	9	430	Literate	real-time RT-PCR	Negative	cELISA	Negative
720	720	Blood, Oropharyngeal swab and cloacal swabs	2017	Hakaluki wetland	Kondupur	Sylhet	Bangladesh	Chattogram Veterinary and Animal Sciences University	Anas platyrhynchos domesticus	Domestic duck	Healthy	Active surveillance	Undefined	Adult	Free-range domestic	waterfowl	10	359	Literate	real-time RT-PCR	Negative	cELISA	Negative
721	721	Blood, Oropharyngeal swab and cloacal swabs	2017	Hakaluki wetland	Kondupur	Sylhet	Bangladesh	Chattogram Veterinary and Animal Sciences University	Anas platyrhynchos domesticus	Domestic duck	Healthy	Active surveillance	Undefined	Adult	Free-range domestic	waterfowl	10	359	Literate	real-time RT-PCR	Positive	cELISA	Positive
722	722	Blood, Oropharyngeal swab and cloacal swabs	2017	Hakaluki wetland	Kondupur	Sylhet	Bangladesh	Chattogram Veterinary and Animal Sciences University	Anas platyrhynchos domesticus	Domestic duck	Healthy	Active surveillance	Undefined	Adult	Free-range domestic	waterfowl	10	359	Literate	real-time RT-PCR	Positive	cELISA	Negative	MT512576
723	723	Blood, Oropharyngeal swab and cloacal swabs	2017	Hakaluki wetland	Kondupur	Sylhet	Bangladesh	Chattogram Veterinary and Animal Sciences University	Anas platyrhynchos domesticus	Domestic duck	Healthy	Active surveillance	Undefined	Adult	Free-range domestic	waterfowl	10	359	Literate	real-time RT-PCR	Positive	cELISA	Negative
724	724	Blood, Oropharyngeal swab and cloacal swabs	2017	Hakaluki wetland	Kondupur	Sylhet	Bangladesh	Chattogram Veterinary and Animal Sciences University	Anas platyrhynchos domesticus	Domestic duck	Healthy	Active surveillance	Undefined	Adult	Free-range domestic	waterfowl	10	359	Literate	real-time RT-PCR	Negative	cELISA	Negative
725	725	Blood, Oropharyngeal swab and cloacal swabs	2017	Tanguar wetland	Barhatta	Sylhet	Bangladesh	Chattogram Veterinary and Animal Sciences University	Anas platyrhynchos domesticus	Domestic duck	Healthy	Active surveillance	Undefined	Adult	Free-range domestic	waterfowl	11	450	Illitarate	real-time RT-PCR	Negative	cELISA	Positive
726	726	Blood, Oropharyngeal swab and cloacal swabs	2017	Tanguar wetland	Barhatta	Sylhet	Bangladesh	Chattogram Veterinary and Animal Sciences University	Anas platyrhynchos domesticus	Domestic duck	Healthy	Active surveillance	Undefined	Adult	Free-range domestic	waterfowl	11	450	Illitarate	real-time RT-PCR	Negative	cELISA	Positive
727	727	Blood, Oropharyngeal swab and cloacal swabs	2017	Tanguar wetland	Barhatta	Sylhet	Bangladesh	Chattogram Veterinary and Animal Sciences University	Anas platyrhynchos domesticus	Domestic duck	Healthy	Active surveillance	Undefined	Adult	Free-range domestic	waterfowl	11	450	Illitarate	real-time RT-PCR	Negative	cELISA	Positive
728	728	Blood, Oropharyngeal swab and cloacal swabs	2017	Tanguar wetland	Barhatta	Sylhet	Bangladesh	Chattogram Veterinary and Animal Sciences University	Anas platyrhynchos domesticus	Domestic duck	Healthy	Active surveillance	Undefined	Adult	Free-range domestic	waterfowl	11	450	Illitarate	real-time RT-PCR	Negative	cELISA	Positive
729	729	Blood, Oropharyngeal swab and cloacal swabs	2017	Tanguar wetland	Barhatta	Sylhet	Bangladesh	Chattogram Veterinary and Animal Sciences University	Anas platyrhynchos domesticus	Domestic duck	Healthy	Active surveillance	Undefined	Adult	Free-range domestic	waterfowl	11	450	Illitarate	real-time RT-PCR	Negative	cELISA	Positive
730	730	Blood, Oropharyngeal swab and cloacal swabs	2017	Tanguar wetland	Barhatta	Sylhet	Bangladesh	Chattogram Veterinary and Animal Sciences University	Anas platyrhynchos domesticus	Domestic duck	Healthy	Active surveillance	Undefined	Adult	Free-range domestic	waterfowl	12	650	Illitarate	real-time RT-PCR	Negative	cELISA	Positive
731	731	Blood, Oropharyngeal swab and cloacal swabs	2017	Tanguar wetland	Barhatta	Sylhet	Bangladesh	Chattogram Veterinary and Animal Sciences University	Anas platyrhynchos domesticus	Domestic duck	Healthy	Active surveillance	Undefined	Adult	Free-range domestic	waterfowl	12	650	Illitarate	real-time RT-PCR	Negative	cELISA	Positive
732	732	Blood, Oropharyngeal swab and cloacal swabs	2017	Tanguar wetland	Barhatta	Sylhet	Bangladesh	Chattogram Veterinary and Animal Sciences University	Anas platyrhynchos domesticus	Domestic duck	Healthy	Active surveillance	Undefined	Adult	Free-range domestic	waterfowl	12	650	Illitarate	real-time RT-PCR	Negative	cELISA	Positive
733	733	Blood, Oropharyngeal swab and cloacal swabs	2017	Tanguar wetland	Barhatta	Sylhet	Bangladesh	Chattogram Veterinary and Animal Sciences University	Anas platyrhynchos domesticus	Domestic duck	Healthy	Active surveillance	Undefined	Adult	Free-range domestic	waterfowl	12	650	Illitarate	real-time RT-PCR	Negative	cELISA	Positive
734	734	Blood, Oropharyngeal swab and cloacal swabs	2017	Tanguar wetland	Barhatta	Sylhet	Bangladesh	Chattogram Veterinary and Animal Sciences University	Anas platyrhynchos domesticus	Domestic duck	Healthy	Active surveillance	Undefined	Adult	Free-range domestic	waterfowl	12	650	Illitarate	real-time RT-PCR	Negative	cELISA	Positive
735	735	Blood, Oropharyngeal swab and cloacal swabs	2017	Tanguar wetland	Mohanganj	Sylhet	Bangladesh	Chattogram Veterinary and Animal Sciences University	Anas platyrhynchos domesticus	Domestic duck	Healthy	Active surveillance	Undefined	Adult	Free-range domestic	waterfowl	13	690	Literate	real-time RT-PCR	Negative	cELISA	Positive
736	736	Blood, Oropharyngeal swab and cloacal swabs	2017	Tanguar wetland	Mohanganj	Sylhet	Bangladesh	Chattogram Veterinary and Animal Sciences University	Anas platyrhynchos domesticus	Domestic duck	Healthy	Active surveillance	Undefined	Adult	Free-range domestic	waterfowl	13	690	Literate	real-time RT-PCR	Negative	cELISA	Positive
737	737	Blood, Oropharyngeal swab and cloacal swabs	2017	Tanguar wetland	Mohanganj	Sylhet	Bangladesh	Chattogram Veterinary and Animal Sciences University	Anas platyrhynchos domesticus	Domestic duck	Healthy	Active surveillance	Undefined	Adult	Free-range domestic	waterfowl	13	690	Literate	real-time RT-PCR	Negative	cELISA	Negative
738	738	Blood, Oropharyngeal swab and cloacal swabs	2017	Tanguar wetland	Mohanganj	Sylhet	Bangladesh	Chattogram Veterinary and Animal Sciences University	Anas platyrhynchos domesticus	Domestic duck	Healthy	Active surveillance	Undefined	Adult	Free-range domestic	waterfowl	13	690	Literate	real-time RT-PCR	Negative	cELISA	Positive
739	739	Blood, Oropharyngeal swab and cloacal swabs	2017	Tanguar wetland	Mohanganj	Sylhet	Bangladesh	Chattogram Veterinary and Animal Sciences University	Anas platyrhynchos domesticus	Domestic duck	Healthy	Active surveillance	Undefined	Adult	Free-range domestic	waterfowl	13	690	Literate	real-time RT-PCR	Negative	cELISA	Positive
740	740	Blood, Oropharyngeal swab and cloacal swabs	2017	Tanguar wetland	Mohanganj	Sylhet	Bangladesh	Chattogram Veterinary and Animal Sciences University	Anas platyrhynchos domesticus	Domestic duck	Healthy	Active surveillance	Undefined	Adult	Free-range domestic	waterfowl	14	570	Literate	real-time RT-PCR	Negative	cELISA	Negative
741	741	Blood, Oropharyngeal swab and cloacal swabs	2017	Tanguar wetland	Mohanganj	Sylhet	Bangladesh	Chattogram Veterinary and Animal Sciences University	Anas platyrhynchos domesticus	Domestic duck	Healthy	Active surveillance	Undefined	Adult	Free-range domestic	waterfowl	14	570	Literate	real-time RT-PCR	Negative	cELISA	Positive
742	742	Blood, Oropharyngeal swab and cloacal swabs	2017	Tanguar wetland	Mohanganj	Sylhet	Bangladesh	Chattogram Veterinary and Animal Sciences University	Anas platyrhynchos domesticus	Domestic duck	Healthy	Active surveillance	Undefined	Adult	Free-range domestic	waterfowl	14	570	Literate	real-time RT-PCR	Negative	cELISA	Positive
743	743	Blood, Oropharyngeal swab and cloacal swabs	2017	Tanguar wetland	Mohanganj	Sylhet	Bangladesh	Chattogram Veterinary and Animal Sciences University	Anas platyrhynchos domesticus	Domestic duck	Healthy	Active surveillance	Undefined	Adult	Free-range domestic	waterfowl	14	570	Literate	real-time RT-PCR	Negative	cELISA	Negative
744	744	Blood, Oropharyngeal swab and cloacal swabs	2017	Tanguar wetland	Mohanganj	Sylhet	Bangladesh	Chattogram Veterinary and Animal Sciences University	Anas platyrhynchos domesticus	Domestic duck	Healthy	Active surveillance	Undefined	Adult	Free-range domestic	waterfowl	14	570	Literate	real-time RT-PCR	Negative	cELISA	Positive
745	745	Blood, Oropharyngeal swab and cloacal swabs	2017	Tanguar wetland	Mohanganj	Sylhet	Bangladesh	Chattogram Veterinary and Animal Sciences University	Anas platyrhynchos domesticus	Domestic duck	Healthy	Active surveillance	Undefined	Adult	Free-range domestic	waterfowl	15	600	Literate	real-time RT-PCR	Negative	cELISA	Positive
746	746	Blood, Oropharyngeal swab and cloacal swabs	2017	Tanguar wetland	Mohanganj	Sylhet	Bangladesh	Chattogram Veterinary and Animal Sciences University	Anas platyrhynchos domesticus	Domestic duck	Healthy	Active surveillance	Undefined	Adult	Free-range domestic	waterfowl	15	600	Literate	real-time RT-PCR	Negative	cELISA	Positive
747	747	Blood, Oropharyngeal swab and cloacal swabs	2017	Tanguar wetland	Mohanganj	Sylhet	Bangladesh	Chattogram Veterinary and Animal Sciences University	Anas platyrhynchos domesticus	Domestic duck	Healthy	Active surveillance	Undefined	Adult	Free-range domestic	waterfowl	15	600	Literate	real-time RT-PCR	Negative	cELISA	Positive
748	748	Blood, Oropharyngeal swab and cloacal swabs	2017	Tanguar wetland	Mohanganj	Sylhet	Bangladesh	Chattogram Veterinary and Animal Sciences University	Anas platyrhynchos domesticus	Domestic duck	Healthy	Active surveillance	Undefined	Adult	Free-range domestic	waterfowl	15	600	Literate	real-time RT-PCR	Negative	cELISA	Positive
749	749	Blood, Oropharyngeal swab and cloacal swabs	2017	Tanguar wetland	Mohanganj	Sylhet	Bangladesh	Chattogram Veterinary and Animal Sciences University	Anas platyrhynchos domesticus	Domestic duck	Healthy	Active surveillance	Undefined	Adult	Free-range domestic	waterfowl	15	600	Literate	real-time RT-PCR	Negative	cELISA	Positive
750	750	Blood, Oropharyngeal swab and cloacal swabs	2017	Tanguar wetland	Mohanganj	Sylhet	Bangladesh	Chattogram Veterinary and Animal Sciences University	Anas platyrhynchos domesticus	Domestic duck	Healthy	Active surveillance	Undefined	Adult	Free-range domestic	waterfowl	16	375	Literate	real-time RT-PCR	Negative	cELISA	Positive
751	751	Blood, Oropharyngeal swab and cloacal swabs	2017	Tanguar wetland	Mohanganj	Sylhet	Bangladesh	Chattogram Veterinary and Animal Sciences University	Anas platyrhynchos domesticus	Domestic duck	Healthy	Active surveillance	Undefined	Adult	Household	with chicken	45	7	Literate	real-time RT-PCR	Negative	cELISA	Positive
752	752	Blood, Oropharyngeal swab and cloacal swabs	2017	Tanguar wetland	Mohanganj	Sylhet	Bangladesh	Chattogram Veterinary and Animal Sciences University	Anas platyrhynchos domesticus	Domestic duck	Healthy	Active surveillance	Undefined	Adult	Household	with chicken	46	9	Literate	real-time RT-PCR	Negative	cELISA	Positive
753	753	Blood, Oropharyngeal swab and cloacal swabs	2017	Tanguar wetland	Mohanganj	Sylhet	Bangladesh	Chattogram Veterinary and Animal Sciences University	Anas platyrhynchos domesticus	Domestic duck	Healthy	Active surveillance	Undefined	Adult	Household	with chicken	47	6	Literate	real-time RT-PCR	Negative	cELISA	Positive
754	754	Blood, Oropharyngeal swab and cloacal swabs	2017	Tanguar wetland	Mohanganj	Sylhet	Bangladesh	Chattogram Veterinary and Animal Sciences University	Anas platyrhynchos domesticus	Domestic duck	Healthy	Active surveillance	Undefined	Adult	Household	with chicken	48	8	Literate	real-time RT-PCR	Negative	cELISA	Positive
755	755	Blood, Oropharyngeal swab and cloacal swabs	2017	Tanguar wetland	Mohanganj	Sylhet	Bangladesh	Chattogram Veterinary and Animal Sciences University	Anas platyrhynchos domesticus	Domestic duck	Healthy	Active surveillance	Undefined	Adult	Household	with chicken	49	6	Literate	real-time RT-PCR	Negative	cELISA	Positive
756	756	Blood, Oropharyngeal swab and cloacal swabs	2017	Tanguar wetland	Mohanganj	Sylhet	Bangladesh	Chattogram Veterinary and Animal Sciences University	Anas platyrhynchos domesticus	Domestic duck	Healthy	Active surveillance	Undefined	Adult	Household	with chicken	50	9	Literate	real-time RT-PCR	Negative	cELISA	Positive
757	757	Blood, Oropharyngeal swab and cloacal swabs	2017	Tanguar wetland	Mohanganj	Sylhet	Bangladesh	Chattogram Veterinary and Animal Sciences University	Anas platyrhynchos domesticus	Domestic duck	Healthy	Active surveillance	Undefined	Adult	Household	with chicken	51	5	Illitarate	real-time RT-PCR	Negative	cELISA	Positive
758	758	Blood, Oropharyngeal swab and cloacal swabs	2017	Tanguar wetland	Mohanganj	Sylhet	Bangladesh	Chattogram Veterinary and Animal Sciences University	Anas platyrhynchos domesticus	Domestic duck	Healthy	Active surveillance	Undefined	Adult	Household	with chicken	52	8	Illitarate	real-time RT-PCR	Negative	cELISA	Positive
759	759	Blood, Oropharyngeal swab and cloacal swabs	2017	Tanguar wetland	Mohanganj	Sylhet	Bangladesh	Chattogram Veterinary and Animal Sciences University	Anas platyrhynchos domesticus	Domestic duck	Healthy	Active surveillance	Undefined	Adult	Household	with chicken	53	6	Illitarate	real-time RT-PCR	Negative	cELISA	Positive
760	760	Blood, Oropharyngeal swab and cloacal swabs	2017	Tanguar wetland	Mohanganj	Sylhet	Bangladesh	Chattogram Veterinary and Animal Sciences University	Anas platyrhynchos domesticus	Domestic duck	Healthy	Active surveillance	Undefined	Adult	Household	with chicken	54	8	Illitarate	real-time RT-PCR	Negative	cELISA	Positive
761	761	Blood, Oropharyngeal swab and cloacal swabs	2017	Tanguar wetland	Mohanganj	Sylhet	Bangladesh	Chattogram Veterinary and Animal Sciences University	Anas platyrhynchos domesticus	Domestic duck	Healthy	Active surveillance	Undefined	Adult	Household	with chicken	55	5	Illitarate	real-time RT-PCR	Negative	cELISA	Positive
762	762	Blood, Oropharyngeal swab and cloacal swabs	2017	Tanguar wetland	Mohanganj	Sylhet	Bangladesh	Chattogram Veterinary and Animal Sciences University	Anas platyrhynchos domesticus	Domestic duck	Healthy	Active surveillance	Undefined	Adult	Household	with chicken	56	8	Illitarate	real-time RT-PCR	Negative	cELISA	Positive
763	763	Blood, Oropharyngeal swab and cloacal swabs	2017	Tanguar wetland	Mohanganj	Sylhet	Bangladesh	Chattogram Veterinary and Animal Sciences University	Anas platyrhynchos domesticus	Domestic duck	Healthy	Active surveillance	Undefined	Adult	Household	without chicken	57	5	Illitarate	real-time RT-PCR	Negative	cELISA	Positive
764	764	Blood, Oropharyngeal swab and cloacal swabs	2017	Tanguar wetland	Mohanganj	Sylhet	Bangladesh	Chattogram Veterinary and Animal Sciences University	Anas platyrhynchos domesticus	Domestic duck	Healthy	Active surveillance	Undefined	Adult	Household	without chicken	58	7	Illitarate	real-time RT-PCR	Negative	cELISA	Positive
765	765	Blood, Oropharyngeal swab and cloacal swabs	2017	Tanguar wetland	Mohanganj	Sylhet	Bangladesh	Chattogram Veterinary and Animal Sciences University	Anas platyrhynchos domesticus	Domestic duck	Healthy	Active surveillance	Undefined	Adult	Household	without chicken	59	9	Illitarate	real-time RT-PCR	Negative	cELISA	Positive
766	766	Blood, Oropharyngeal swab and cloacal swabs	2017	Tanguar wetland	Mohanganj	Sylhet	Bangladesh	Chattogram Veterinary and Animal Sciences University	Anas platyrhynchos domesticus	Domestic duck	Healthy	Active surveillance	Undefined	Adult	Household	without chicken	60	7	Illitarate	real-time RT-PCR	Negative	cELISA	Positive
767	767	Blood, Oropharyngeal swab and cloacal swabs	2017	Tanguar wetland	Mohanganj	Sylhet	Bangladesh	Chattogram Veterinary and Animal Sciences University	Anas platyrhynchos domesticus	Domestic duck	Healthy	Active surveillance	Undefined	Adult	Household	with chicken	61	6	Literate	real-time RT-PCR	Negative	cELISA	Positive
768	768	Blood, Oropharyngeal swab and cloacal swabs	2017	Tanguar wetland	Mohanganj	Sylhet	Bangladesh	Chattogram Veterinary and Animal Sciences University	Anas platyrhynchos domesticus	Domestic duck	Healthy	Active surveillance	Undefined	Adult	Household	with chicken	62	8	Literate	real-time RT-PCR	Negative	cELISA	Positive
769	769	Blood, Oropharyngeal swab and cloacal swabs	2017	Tanguar wetland	Mohanganj	Sylhet	Bangladesh	Chattogram Veterinary and Animal Sciences University	Anas platyrhynchos domesticus	Domestic duck	Healthy	Active surveillance	Undefined	Adult	Household	with chicken	63	5	Literate	real-time RT-PCR	Negative	cELISA	Positive
770	770	Blood, Oropharyngeal swab and cloacal swabs	2017	Tanguar wetland	Mohanganj	Sylhet	Bangladesh	Chattogram Veterinary and Animal Sciences University	Anas platyrhynchos domesticus	Domestic duck	Healthy	Active surveillance	Undefined	Adult	Household	with chicken	64	9	Literate	real-time RT-PCR	Negative	cELISA	Positive
771	771	Blood, Oropharyngeal swab and cloacal swabs	2017	Tanguar wetland	Mohanganj	Sylhet	Bangladesh	Chattogram Veterinary and Animal Sciences University	Anas platyrhynchos domesticus	Domestic duck	Healthy	Active surveillance	Undefined	Adult	Household	with chicken	65	7	Literate	real-time RT-PCR	Negative	cELISA	Positive
772	772	Blood, Oropharyngeal swab and cloacal swabs	2017	Tanguar wetland	Mohanganj	Sylhet	Bangladesh	Chattogram Veterinary and Animal Sciences University	Anas platyrhynchos domesticus	Domestic duck	Healthy	Active surveillance	Undefined	Adult	Household	with chicken	66	6	Literate	real-time RT-PCR	Negative	cELISA	Positive
773	773	Blood, Oropharyngeal swab and cloacal swabs	2017	Tanguar wetland	Mohanganj	Sylhet	Bangladesh	Chattogram Veterinary and Animal Sciences University	Anas platyrhynchos domesticus	Domestic duck	Healthy	Active surveillance	Undefined	Adult	Household	with chicken	67	5	Literate	real-time RT-PCR	Negative	cELISA	Positive
774	774	Blood, Oropharyngeal swab and cloacal swabs	2017	Tanguar wetland	Mohanganj	Sylhet	Bangladesh	Chattogram Veterinary and Animal Sciences University	Anas platyrhynchos domesticus	Domestic duck	Healthy	Active surveillance	Undefined	Adult	Household	with chicken	68	8	Literate	real-time RT-PCR	Negative	cELISA	Positive
775	775	Blood, Oropharyngeal swab and cloacal swabs	2017	Tanguar wetland	Mohanganj	Sylhet	Bangladesh	Chattogram Veterinary and Animal Sciences University	Anas platyrhynchos domesticus	Domestic duck	Healthy	Active surveillance	Undefined	Adult	Household	with chicken	69	6	Literate	real-time RT-PCR	Negative	cELISA	Positive
776	776	Blood, Oropharyngeal swab and cloacal swabs	2017	Tanguar wetland	Mohanganj	Sylhet	Bangladesh	Chattogram Veterinary and Animal Sciences University	Anas platyrhynchos domesticus	Domestic duck	Healthy	Active surveillance	Undefined	Adult	Household	with chicken	70	9	Literate	real-time RT-PCR	Negative	cELISA	Positive
777	777	Blood, Oropharyngeal swab and cloacal swabs	2017	Tanguar wetland	Jamalganj	Sylhet	Bangladesh	Chattogram Veterinary and Animal Sciences University	Anas platyrhynchos domesticus	Domestic duck	Healthy	Active surveillance	Undefined	Adult	Household	without chicken	71	7	Literate	real-time RT-PCR	Negative	cELISA	Positive
778	778	Blood, Oropharyngeal swab and cloacal swabs	2017	Tanguar wetland	Jamalganj	Sylhet	Bangladesh	Chattogram Veterinary and Animal Sciences University	Anas platyrhynchos domesticus	Domestic duck	Healthy	Active surveillance	Undefined	Adult	Household	without chicken	72	9	Literate	real-time RT-PCR	Negative	cELISA	Positive
779	779	Blood, Oropharyngeal swab and cloacal swabs	2017	Tanguar wetland	Jamalganj	Sylhet	Bangladesh	Chattogram Veterinary and Animal Sciences University	Anas platyrhynchos domesticus	Domestic duck	Healthy	Active surveillance	Undefined	Adult	Household	without chicken	73	6	Literate	real-time RT-PCR	Negative	cELISA	Positive
780	780	Blood, Oropharyngeal swab and cloacal swabs	2017	Tanguar wetland	Jamalganj	Sylhet	Bangladesh	Chattogram Veterinary and Animal Sciences University	Anas platyrhynchos domesticus	Domestic duck	Healthy	Active surveillance	Undefined	Adult	Household	without chicken	74	8	Illitarate	real-time RT-PCR	Negative	cELISA	Positive
781	781	Blood, Oropharyngeal swab and cloacal swabs	2017	Tanguar wetland	Jamalganj	Sylhet	Bangladesh	Chattogram Veterinary and Animal Sciences University	Anas platyrhynchos domesticus	Domestic duck	Healthy	Active surveillance	Undefined	Adult	Household	without chicken	75	7	Illitarate	real-time RT-PCR	Negative	cELISA	Positive
782	782	Blood, Oropharyngeal swab and cloacal swabs	2017	Tanguar wetland	Jamalganj	Sylhet	Bangladesh	Chattogram Veterinary and Animal Sciences University	Anas platyrhynchos domesticus	Domestic duck	Healthy	Active surveillance	Undefined	Adult	Household	without chicken	76	5	Illitarate	real-time RT-PCR	Negative	cELISA	Negative
783	783	Blood, Oropharyngeal swab and cloacal swabs	2017	Tanguar wetland	Jamalganj	Sylhet	Bangladesh	Chattogram Veterinary and Animal Sciences University	Anas platyrhynchos domesticus	Domestic duck	Healthy	Active surveillance	Undefined	Adult	Household	without chicken	77	7	Illitarate	real-time RT-PCR	Negative	cELISA	Positive
784	784	Blood, Oropharyngeal swab and cloacal swabs	2017	Tanguar wetland	Jamalganj	Sylhet	Bangladesh	Chattogram Veterinary and Animal Sciences University	Anas platyrhynchos domesticus	Domestic duck	Healthy	Active surveillance	Undefined	Adult	Household	without chicken	78	6	Illitarate	real-time RT-PCR	Negative	cELISA	Positive
785	785	Blood, Oropharyngeal swab and cloacal swabs	2017	Tanguar wetland	Jamalganj	Sylhet	Bangladesh	Chattogram Veterinary and Animal Sciences University	Anas platyrhynchos domesticus	Domestic duck	Healthy	Active surveillance	Undefined	Adult	Household	without chicken	79	9	Illitarate	real-time RT-PCR	Negative	cELISA	Positive
786	786	Blood, Oropharyngeal swab and cloacal swabs	2017	Tanguar wetland	Jamalganj	Sylhet	Bangladesh	Chattogram Veterinary and Animal Sciences University	Anas platyrhynchos domesticus	Domestic duck	Healthy	Active surveillance	Undefined	Adult	Household	without chicken	80	7	Illitarate	real-time RT-PCR	Negative	cELISA	Positive
787	787	Blood, Oropharyngeal swab and cloacal swabs	2017	Tanguar wetland	Jamalganj	Sylhet	Bangladesh	Chattogram Veterinary and Animal Sciences University	Anas platyrhynchos domesticus	Domestic duck	Healthy	Active surveillance	Undefined	Adult	Household	without chicken	81	8	Illitarate	real-time RT-PCR	Negative	cELISA	Negative
788	788	Blood, Oropharyngeal swab and cloacal swabs	2017	Tanguar wetland	Jamalganj	Sylhet	Bangladesh	Chattogram Veterinary and Animal Sciences University	Anas platyrhynchos domesticus	Domestic duck	Healthy	Active surveillance	Undefined	Adult	Household	without chicken	82	6	Illitarate	real-time RT-PCR	Negative	cELISA	Positive
789	789	Blood, Oropharyngeal swab and cloacal swabs	2017	Tanguar wetland	Jamalganj	Sylhet	Bangladesh	Chattogram Veterinary and Animal Sciences University	Anas platyrhynchos domesticus	Domestic duck	Healthy	Active surveillance	Undefined	Adult	Household	without chicken	83	8	Illitarate	real-time RT-PCR	Negative	cELISA	Negative
790	790	Blood, Oropharyngeal swab and cloacal swabs	2017	Tanguar wetland	Jamalganj	Sylhet	Bangladesh	Chattogram Veterinary and Animal Sciences University	Anas platyrhynchos domesticus	Domestic duck	Healthy	Active surveillance	Undefined	Adult	Household	without chicken	84	7	Illitarate	real-time RT-PCR	Negative	cELISA	Negative
791	791	Blood, Oropharyngeal swab and cloacal swabs	2017	Tanguar wetland	Jamalganj	Sylhet	Bangladesh	Chattogram Veterinary and Animal Sciences University	Anas platyrhynchos domesticus	Domestic duck	Healthy	Active surveillance	Undefined	Adult	Household	without chicken	85	9	Illitarate	real-time RT-PCR	Negative	cELISA	Negative
792	792	Blood, Oropharyngeal swab and cloacal swabs	2017	Tanguar wetland	Jamalganj	Sylhet	Bangladesh	Chattogram Veterinary and Animal Sciences University	Anas platyrhynchos domesticus	Domestic duck	Healthy	Active surveillance	Undefined	Adult	Household	with chicken	86	10	Illitarate	real-time RT-PCR	Negative	cELISA	Negative
793	793	Blood, Oropharyngeal swab and cloacal swabs	2017	Tanguar wetland	Jamalganj	Sylhet	Bangladesh	Chattogram Veterinary and Animal Sciences University	Anas platyrhynchos domesticus	Domestic duck	Healthy	Active surveillance	Undefined	Adult	Household	with chicken	87	6	Literate	real-time RT-PCR	Negative	cELISA	Negative
794	794	Blood, Oropharyngeal swab and cloacal swabs	2017	Tanguar wetland	Jamalganj	Sylhet	Bangladesh	Chattogram Veterinary and Animal Sciences University	Anas platyrhynchos domesticus	Domestic duck	Healthy	Active surveillance	Undefined	Adult	Household	with chicken	88	5	Literate	real-time RT-PCR	Negative	cELISA	Positive
795	795	Blood, Oropharyngeal swab and cloacal swabs	2017	Tanguar wetland	Jamalganj	Sylhet	Bangladesh	Chattogram Veterinary and Animal Sciences University	Anas platyrhynchos domesticus	Domestic duck	Healthy	Active surveillance	Undefined	Adult	Household	with chicken	89	11	Literate	real-time RT-PCR	Negative	cELISA	Positive
796	796	Blood, Oropharyngeal swab and cloacal swabs	2017	Tanguar wetland	Mohanganj	Sylhet	Bangladesh	Chattogram Veterinary and Animal Sciences University	Anas platyrhynchos domesticus	Domestic duck	Healthy	Active surveillance	Undefined	Adult	Free-range domestic	waterfowl	16	375	Literate	real-time RT-PCR	Negative	cELISA	Negative
797	797	Blood, Oropharyngeal swab and cloacal swabs	2017	Tanguar wetland	Mohanganj	Sylhet	Bangladesh	Chattogram Veterinary and Animal Sciences University	Anas platyrhynchos domesticus	Domestic duck	Healthy	Active surveillance	Undefined	Adult	Free-range domestic	waterfowl	16	375	Literate	real-time RT-PCR	Negative	cELISA	Negative
798	798	Blood, Oropharyngeal swab and cloacal swabs	2017	Tanguar wetland	Mohanganj	Sylhet	Bangladesh	Chattogram Veterinary and Animal Sciences University	Anas platyrhynchos domesticus	Domestic duck	Healthy	Active surveillance	Undefined	Adult	Free-range domestic	waterfowl	16	375	Literate	real-time RT-PCR	Negative	cELISA	Negative
799	799	Blood, Oropharyngeal swab and cloacal swabs	2017	Tanguar wetland	Mohanganj	Sylhet	Bangladesh	Chattogram Veterinary and Animal Sciences University	Anas platyrhynchos domesticus	Domestic duck	Healthy	Active surveillance	Undefined	Adult	Free-range domestic	waterfowl	16	375	Literate	real-time RT-PCR	Negative	cELISA	Negative
800	800	Blood, Oropharyngeal swab and cloacal swabs	2017	Tanguar wetland	Jamalganj	Sylhet	Bangladesh	Chattogram Veterinary and Animal Sciences University	Anas platyrhynchos domesticus	Domestic duck	Healthy	Active surveillance	Undefined	Adult	Free-range domestic	waterfowl	17	520	Literate	real-time RT-PCR	Negative	cELISA	Negative
801	801	Blood, Oropharyngeal swab and cloacal swabs	2017	Tanguar wetland	Jamalganj	Sylhet	Bangladesh	Chattogram Veterinary and Animal Sciences University	Anas platyrhynchos domesticus	Domestic duck	Healthy	Active surveillance	Undefined	Adult	Free-range domestic	waterfowl	17	520	Literate	real-time RT-PCR	Negative	cELISA	Positive
802	802	Blood, Oropharyngeal swab and cloacal swabs	2017	Tanguar wetland	Jamalganj	Sylhet	Bangladesh	Chattogram Veterinary and Animal Sciences University	Anas platyrhynchos domesticus	Domestic duck	Healthy	Active surveillance	Undefined	Adult	Free-range domestic	waterfowl	17	520	Literate	real-time RT-PCR	Negative	cELISA	Negative
803	803	Blood, Oropharyngeal swab and cloacal swabs	2017	Tanguar wetland	Jamalganj	Sylhet	Bangladesh	Chattogram Veterinary and Animal Sciences University	Anas platyrhynchos domesticus	Domestic duck	Healthy	Active surveillance	Undefined	Adult	Free-range domestic	waterfowl	17	520	Literate	real-time RT-PCR	Negative	cELISA	Positive
804	804	Blood, Oropharyngeal swab and cloacal swabs	2017	Tanguar wetland	Jamalganj	Sylhet	Bangladesh	Chattogram Veterinary and Animal Sciences University	Anas platyrhynchos domesticus	Domestic duck	Healthy	Active surveillance	Undefined	Adult	Free-range domestic	waterfowl	17	520	Literate	real-time RT-PCR	Negative	cELISA	Positive
805	805	Blood, Oropharyngeal swab and cloacal swabs	2017	Tanguar wetland	Jamalganj	Sylhet	Bangladesh	Chattogram Veterinary and Animal Sciences University	Anas platyrhynchos domesticus	Domestic duck	Healthy	Active surveillance	Undefined	Adult	Free-range domestic	waterfowl	18	380	Literate	real-time RT-PCR	Negative	cELISA	Negative
806	806	Blood, Oropharyngeal swab and cloacal swabs	2017	Tanguar wetland	Jamalganj	Sylhet	Bangladesh	Chattogram Veterinary and Animal Sciences University	Anas platyrhynchos domesticus	Domestic duck	Healthy	Active surveillance	Undefined	Adult	Free-range domestic	waterfowl	18	380	Literate	real-time RT-PCR	Negative	cELISA	Negative
807	807	Blood, Oropharyngeal swab and cloacal swabs	2017	Tanguar wetland	Jamalganj	Sylhet	Bangladesh	Chattogram Veterinary and Animal Sciences University	Anas platyrhynchos domesticus	Domestic duck	Healthy	Active surveillance	Undefined	Adult	Free-range domestic	waterfowl	18	380	Literate	real-time RT-PCR	Negative	cELISA	Negative
808	808	Blood, Oropharyngeal swab and cloacal swabs	2017	Tanguar wetland	Jamalganj	Sylhet	Bangladesh	Chattogram Veterinary and Animal Sciences University	Anas platyrhynchos domesticus	Domestic duck	Healthy	Active surveillance	Undefined	Adult	Free-range domestic	waterfowl	18	380	Literate	real-time RT-PCR	Negative	cELISA	Negative
809	809	Blood, Oropharyngeal swab and cloacal swabs	2017	Tanguar wetland	Jamalganj	Sylhet	Bangladesh	Chattogram Veterinary and Animal Sciences University	Anas platyrhynchos domesticus	Domestic duck	Healthy	Active surveillance	Undefined	Adult	Free-range domestic	waterfowl	18	380	Literate	real-time RT-PCR	Negative	cELISA	Negative
810	810	Blood, Oropharyngeal swab and cloacal swabs	2017	Tanguar wetland	Jamalganj	Sylhet	Bangladesh	Chattogram Veterinary and Animal Sciences University	Anas platyrhynchos domesticus	Domestic duck	Healthy	Active surveillance	Undefined	Adult	Free-range domestic	waterfowl	19	310	Literate	real-time RT-PCR	Negative	cELISA	Negative
811	811	Blood, Oropharyngeal swab and cloacal swabs	2017	Tanguar wetland	Jamalganj	Sylhet	Bangladesh	Chattogram Veterinary and Animal Sciences University	Anas platyrhynchos domesticus	Domestic duck	Healthy	Active surveillance	Undefined	Adult	Free-range domestic	waterfowl	19	310	Literate	real-time RT-PCR	Negative	cELISA	Negative
812	812	Blood, Oropharyngeal swab and cloacal swabs	2017	Tanguar wetland	Jamalganj	Sylhet	Bangladesh	Chattogram Veterinary and Animal Sciences University	Anas platyrhynchos domesticus	Domestic duck	Healthy	Active surveillance	Undefined	Adult	Free-range domestic	waterfowl	19	310	Illitarate	real-time RT-PCR	Negative	cELISA	Negative
813	813	Blood, Oropharyngeal swab and cloacal swabs	2017	Hakaluki wetland	Kondupur	Sylhet	Bangladesh	Chattogram Veterinary and Animal Sciences University	Anas platyrhynchos domesticus	Domestic duck	Healthy	Active surveillance	Undefined	Adult	Household	without chicken	90	6	Illitarate	real-time RT-PCR	Negative	cELISA	Positive
814	814	Blood, Oropharyngeal swab and cloacal swabs	2017	Hakaluki wetland	Kondupur	Sylhet	Bangladesh	Chattogram Veterinary and Animal Sciences University	Anas platyrhynchos domesticus	Domestic duck	Healthy	Active surveillance	Undefined	Adult	Household	without chicken	91	5	Illitarate	real-time RT-PCR	Negative	cELISA	Negative
815	815	Blood, Oropharyngeal swab and cloacal swabs	2017	Hakaluki wetland	Kondupur	Sylhet	Bangladesh	Chattogram Veterinary and Animal Sciences University	Anas platyrhynchos domesticus	Domestic duck	Healthy	Active surveillance	Undefined	Adult	Household	without chicken	92	7	Literate	real-time RT-PCR	Negative	cELISA	Negative
816	816	Blood, Oropharyngeal swab and cloacal swabs	2017	Hakaluki wetland	Kondupur	Sylhet	Bangladesh	Chattogram Veterinary and Animal Sciences University	Anas platyrhynchos domesticus	Domestic duck	Healthy	Active surveillance	Undefined	Adult	Household	without chicken	93	5	Literate	real-time RT-PCR	Negative	cELISA	Negative
817	817	Blood, Oropharyngeal swab and cloacal swabs	2017	Hakaluki wetland	Kondupur	Sylhet	Bangladesh	Chattogram Veterinary and Animal Sciences University	Anas platyrhynchos domesticus	Domestic duck	Healthy	Active surveillance	Undefined	Adult	Household	without chicken	94	8	Literate	real-time RT-PCR	Negative	cELISA	Positive
818	818	Blood, Oropharyngeal swab and cloacal swabs	2017	Hakaluki wetland	Kondupur	Sylhet	Bangladesh	Chattogram Veterinary and Animal Sciences University	Anas platyrhynchos domesticus	Domestic duck	Healthy	Active surveillance	Undefined	Adult	Household	without chicken	95	5	Literate	real-time RT-PCR	Negative	cELISA	Positive
819	819	Blood, Oropharyngeal swab and cloacal swabs	2017	Hakaluki wetland	Kondupur	Sylhet	Bangladesh	Chattogram Veterinary and Animal Sciences University	Anas platyrhynchos domesticus	Domestic duck	Healthy	Active surveillance	Undefined	Adult	Household	without chicken	96	9	Literate	real-time RT-PCR	Negative	cELISA	Negative
820	820	Blood, Oropharyngeal swab and cloacal swabs	2017	Hakaluki wetland	Kondupur	Sylhet	Bangladesh	Chattogram Veterinary and Animal Sciences University	Anas platyrhynchos domesticus	Domestic duck	Healthy	Active surveillance	Undefined	Adult	Household	without chicken	97	6	Illitarate	real-time RT-PCR	Negative	cELISA	Negative
821	821	Blood, Oropharyngeal swab and cloacal swabs	2017	Hakaluki wetland	Kondupur	Sylhet	Bangladesh	Chattogram Veterinary and Animal Sciences University	Anas platyrhynchos domesticus	Domestic duck	Healthy	Active surveillance	Undefined	Adult	Household	with chicken	98	9	Illitarate	real-time RT-PCR	Negative	cELISA	Positive
822	822	Blood, Oropharyngeal swab and cloacal swabs	2017	Hakaluki wetland	Kondupur	Sylhet	Bangladesh	Chattogram Veterinary and Animal Sciences University	Anas platyrhynchos domesticus	Domestic duck	Healthy	Active surveillance	Undefined	Adult	Household	with chicken	99	7	Illitarate	real-time RT-PCR	Negative	cELISA	Positive
823	823	Blood, Oropharyngeal swab and cloacal swabs	2017	Hakaluki wetland	Kondupur	Sylhet	Bangladesh	Chattogram Veterinary and Animal Sciences University	Anas platyrhynchos domesticus	Domestic duck	Healthy	Active surveillance	Undefined	Adult	Household	with chicken	100	5	Literate	real-time RT-PCR	Negative	cELISA	Positive
824	824	Blood, Oropharyngeal swab and cloacal swabs	2017	Hakaluki wetland	Barlekha	Sylhet	Bangladesh	Chattogram Veterinary and Animal Sciences University	Anas platyrhynchos domesticus	Domestic duck	Healthy	Active surveillance	Undefined	Adult	Household	with chicken	101	8	Literate	real-time RT-PCR	Negative	cELISA	Positive
825	825	Blood, Oropharyngeal swab and cloacal swabs	2017	Hakaluki wetland	Barlekha	Sylhet	Bangladesh	Chattogram Veterinary and Animal Sciences University	Anas platyrhynchos domesticus	Domestic duck	Healthy	Active surveillance	Undefined	Adult	Household	with chicken	102	5	Literate	real-time RT-PCR	Negative	cELISA	Positive
826	826	Blood, Oropharyngeal swab and cloacal swabs	2017	Hakaluki wetland	Barlekha	Sylhet	Bangladesh	Chattogram Veterinary and Animal Sciences University	Anas platyrhynchos domesticus	Domestic duck	Healthy	Active surveillance	Undefined	Adult	Household	with chicken	103	9	Literate	real-time RT-PCR	Negative	cELISA	Negative
827	827	Blood, Oropharyngeal swab and cloacal swabs	2017	Hakaluki wetland	Barlekha	Sylhet	Bangladesh	Chattogram Veterinary and Animal Sciences University	Anas platyrhynchos domesticus	Domestic duck	Healthy	Active surveillance	Undefined	Adult	Household	without chicken	104	6	Literate	real-time RT-PCR	Negative	cELISA	Negative
828	828	Blood, Oropharyngeal swab and cloacal swabs	2017	Hakaluki wetland	Barlekha	Sylhet	Bangladesh	Chattogram Veterinary and Animal Sciences University	Anas platyrhynchos domesticus	Domestic duck	Healthy	Active surveillance	Undefined	Adult	Household	without chicken	105	8	Literate	real-time RT-PCR	Negative	cELISA	Negative
829	829	Blood, Oropharyngeal swab and cloacal swabs	2017	Hakaluki wetland	Barlekha	Sylhet	Bangladesh	Chattogram Veterinary and Animal Sciences University	Anas platyrhynchos domesticus	Domestic duck	Healthy	Active surveillance	Undefined	Adult	Household	with chicken	106	7	Literate	real-time RT-PCR	Negative	cELISA	Positive
830	830	Blood, Oropharyngeal swab and cloacal swabs	2017	Hakaluki wetland	Barlekha	Sylhet	Bangladesh	Chattogram Veterinary and Animal Sciences University	Anas platyrhynchos domesticus	Domestic duck	Healthy	Active surveillance	Undefined	Adult	Household	without chicken	107	9	Literate	real-time RT-PCR	Negative	cELISA	Negative
831	831	Blood, Oropharyngeal swab and cloacal swabs	2017	Hakaluki wetland	Barlekha	Sylhet	Bangladesh	Chattogram Veterinary and Animal Sciences University	Anas platyrhynchos domesticus	Domestic duck	Healthy	Active surveillance	Undefined	Adult	Household	without chicken	108	5	Literate	real-time RT-PCR	Negative	cELISA	Negative
832	832	Blood, Oropharyngeal swab and cloacal swabs	2017	Hakaluki wetland	Barlekha	Sylhet	Bangladesh	Chattogram Veterinary and Animal Sciences University	Anas platyrhynchos domesticus	Domestic duck	Healthy	Active surveillance	Undefined	Adult	Household	without chicken	109	7	Literate	real-time RT-PCR	Negative	cELISA	Negative
833	833	Blood, Oropharyngeal swab and cloacal swabs	2017	Hakaluki wetland	Barlekha	Sylhet	Bangladesh	Chattogram Veterinary and Animal Sciences University	Anas platyrhynchos domesticus	Domestic duck	Healthy	Active surveillance	Undefined	Adult	Household	without chicken	110	8	Literate	real-time RT-PCR	Negative	cELISA	Negative
834	834	Blood, Oropharyngeal swab and cloacal swabs	2017	Hakaluki wetland	Barlekha	Sylhet	Bangladesh	Chattogram Veterinary and Animal Sciences University	Anas platyrhynchos domesticus	Domestic duck	Healthy	Active surveillance	Undefined	Adult	Household	without chicken	111	6	Literate	real-time RT-PCR	Negative	cELISA	Positive
835	835	Blood, Oropharyngeal swab and cloacal swabs	2017	Hakaluki wetland	Barlekha	Sylhet	Bangladesh	Chattogram Veterinary and Animal Sciences University	Anas platyrhynchos domesticus	Domestic duck	Healthy	Active surveillance	Undefined	Adult	Household	without chicken	112	9	Literate	real-time RT-PCR	Negative	cELISA	Negative
836	836	Blood, Oropharyngeal swab and cloacal swabs	2017	Hakaluki wetland	Barlekha	Sylhet	Bangladesh	Chattogram Veterinary and Animal Sciences University	Anas platyrhynchos domesticus	Domestic duck	Healthy	Active surveillance	Undefined	Adult	Household	without chicken	113	10	Literate	real-time RT-PCR	Negative	cELISA	Negative
837	837	Blood, Oropharyngeal swab and cloacal swabs	2017	Hakaluki wetland	Barlekha	Sylhet	Bangladesh	Chattogram Veterinary and Animal Sciences University	Anas platyrhynchos domesticus	Domestic duck	Healthy	Active surveillance	Undefined	Adult	Household	without chicken	114	7	Illitarate	real-time RT-PCR	Negative	cELISA	Positive
838	838	Blood, Oropharyngeal swab and cloacal swabs	2017	Hakaluki wetland	Barlekha	Sylhet	Bangladesh	Chattogram Veterinary and Animal Sciences University	Anas platyrhynchos domesticus	Domestic duck	Healthy	Active surveillance	Undefined	Adult	Household	without chicken	115	5	Illitarate	real-time RT-PCR	Negative	cELISA	Negative
839	839	Blood, Oropharyngeal swab and cloacal swabs	2017	Hakaluki wetland	Barlekha	Sylhet	Bangladesh	Chattogram Veterinary and Animal Sciences University	Anas platyrhynchos domesticus	Domestic duck	Healthy	Active surveillance	Undefined	Adult	Household	with chicken	116	8	Illitarate	real-time RT-PCR	Negative	cELISA	Negative
840	840	Blood, Oropharyngeal swab and cloacal swabs	2017	Hakaluki wetland	Barlekha	Sylhet	Bangladesh	Chattogram Veterinary and Animal Sciences University	Anas platyrhynchos domesticus	Domestic duck	Healthy	Active surveillance	Undefined	Adult	Household	with chicken	117	5	Illitarate	real-time RT-PCR	Negative	cELISA	Negative
841	841	Blood, Oropharyngeal swab and cloacal swabs	2017	Hakaluki wetland	Barlekha	Sylhet	Bangladesh	Chattogram Veterinary and Animal Sciences University	Anas platyrhynchos domesticus	Domestic duck	Healthy	Active surveillance	Undefined	Adult	Household	with chicken	118	7	Illitarate	real-time RT-PCR	Negative	cELISA	Negative
842	842	Blood, Oropharyngeal swab and cloacal swabs	2017	Hakaluki wetland	Barlekha	Sylhet	Bangladesh	Chattogram Veterinary and Animal Sciences University	Anas platyrhynchos domesticus	Domestic duck	Healthy	Active surveillance	Undefined	Adult	Household	with chicken	119	9	Illitarate	real-time RT-PCR	Negative	cELISA	Positive
843	843	Blood, Oropharyngeal swab and cloacal swabs	2017	Hakaluki wetland	Barlekha	Sylhet	Bangladesh	Chattogram Veterinary and Animal Sciences University	Anas platyrhynchos domesticus	Domestic duck	Healthy	Active surveillance	Undefined	Adult	Household	with chicken	120	5	Illitarate	real-time RT-PCR	Negative	cELISA	Positive
844	844	Blood, Oropharyngeal swab and cloacal swabs	2017	Hakaluki wetland	Barlekha	Sylhet	Bangladesh	Chattogram Veterinary and Animal Sciences University	Anas platyrhynchos domesticus	Domestic duck	Healthy	Active surveillance	Undefined	Adult	Household	with chicken	121	7	Illitarate	real-time RT-PCR	Negative	cELISA	Negative
845	845	Blood, Oropharyngeal swab and cloacal swabs	2017	Hakaluki wetland	Barlekha	Sylhet	Bangladesh	Chattogram Veterinary and Animal Sciences University	Anas platyrhynchos domesticus	Domestic duck	Healthy	Active surveillance	Undefined	Adult	Household	with chicken	122	9	Illitarate	real-time RT-PCR	Negative	cELISA	Positive
846	846	Blood, Oropharyngeal swab and cloacal swabs	2017	Hakaluki wetland	Barlekha	Sylhet	Bangladesh	Chattogram Veterinary and Animal Sciences University	Anas platyrhynchos domesticus	Domestic duck	Healthy	Active surveillance	Undefined	Adult	Household	with chicken	123	5	Literate	real-time RT-PCR	Negative	cELISA	Positive
847	847	Blood, Oropharyngeal swab and cloacal swabs	2017	Hakaluki wetland	Barlekha	Sylhet	Bangladesh	Chattogram Veterinary and Animal Sciences University	Anas platyrhynchos domesticus	Domestic duck	Healthy	Active surveillance	Undefined	Adult	Household	without chicken	124	7	Literate	real-time RT-PCR	Negative	cELISA	Positive
848	848	Blood, Oropharyngeal swab and cloacal swabs	2017	Hakaluki wetland	Barlekha	Sylhet	Bangladesh	Chattogram Veterinary and Animal Sciences University	Anas platyrhynchos domesticus	Domestic duck	Healthy	Active surveillance	Undefined	Adult	Household	without chicken	125	9	Literate	real-time RT-PCR	Negative	cELISA	Positive
849	849	Blood, Oropharyngeal swab and cloacal swabs	2017	Hakaluki wetland	Barlekha	Sylhet	Bangladesh	Chattogram Veterinary and Animal Sciences University	Anas platyrhynchos domesticus	Domestic duck	Healthy	Active surveillance	Undefined	Adult	Household	without chicken	126	6	Literate	real-time RT-PCR	Negative	cELISA	Negative
850	850	Blood, Oropharyngeal swab and cloacal swabs	2017	Hakaluki wetland	Barlekha	Sylhet	Bangladesh	Chattogram Veterinary and Animal Sciences University	Anas platyrhynchos domesticus	Domestic duck	Healthy	Active surveillance	Undefined	Adult	Household	without chicken	127	8	Literate	real-time RT-PCR	Negative	cELISA	Positive
851	851	Blood, Oropharyngeal swab and cloacal swabs	2017	Hakaluki wetland	Barlekha	Sylhet	Bangladesh	Chattogram Veterinary and Animal Sciences University	Anas platyrhynchos domesticus	Domestic duck	Healthy	Active surveillance	Undefined	Adult	Household	without chicken	128	5	Literate	real-time RT-PCR	Negative	cELISA	Negative
852	852	Blood, Oropharyngeal swab and cloacal swabs	2017	Hakaluki wetland	Barlekha	Sylhet	Bangladesh	Chattogram Veterinary and Animal Sciences University	Anas platyrhynchos domesticus	Domestic duck	Healthy	Active surveillance	Undefined	Adult	Household	without chicken	129	8	Literate	real-time RT-PCR	Negative	cELISA	Negative
853	853	Blood, Oropharyngeal swab and cloacal swabs	2017	Hakaluki wetland	Barlekha	Sylhet	Bangladesh	Chattogram Veterinary and Animal Sciences University	Anas platyrhynchos domesticus	Domestic duck	Healthy	Active surveillance	Undefined	Adult	Household	without chicken	130	6	Literate	real-time RT-PCR	Negative	cELISA	Positive
854	854	Blood, Oropharyngeal swab and cloacal swabs	2017	Hakaluki wetland	Barlekha	Sylhet	Bangladesh	Chattogram Veterinary and Animal Sciences University	Anas platyrhynchos domesticus	Domestic duck	Healthy	Active surveillance	Undefined	Adult	Household	without chicken	131	9	Literate	real-time RT-PCR	Negative	cELISA	Positive
855	855	Blood, Oropharyngeal swab and cloacal swabs	2017	Hakaluki wetland	Barlekha	Sylhet	Bangladesh	Chattogram Veterinary and Animal Sciences University	Anas platyrhynchos domesticus	Domestic duck	Healthy	Active surveillance	Undefined	Adult	Household	without chicken	132	7	Literate	real-time RT-PCR	Negative	cELISA	Positive
856	856	Blood, Oropharyngeal swab and cloacal swabs	2017	Hakaluki wetland	Barlekha	Sylhet	Bangladesh	Chattogram Veterinary and Animal Sciences University	Anas platyrhynchos domesticus	Domestic duck	Healthy	Active surveillance	Undefined	Adult	Household	without chicken	133	5	Literate	real-time RT-PCR	Negative	cELISA	Negative
857	857	Blood, Oropharyngeal swab and cloacal swabs	2017	Hakaluki wetland	Barlekha	Sylhet	Bangladesh	Chattogram Veterinary and Animal Sciences University	Anas platyrhynchos domesticus	Domestic duck	Healthy	Active surveillance	Undefined	Adult	Household	without chicken	134	8	Literate	real-time RT-PCR	Negative	cELISA	Positive
858	858	Blood, Oropharyngeal swab and cloacal swabs	2017	Hakaluki wetland	Barlekha	Sylhet	Bangladesh	Chattogram Veterinary and Animal Sciences University	Anas platyrhynchos domesticus	Domestic duck	Healthy	Active surveillance	Undefined	Adult	Household	without chicken	135	6	Illitarate	real-time RT-PCR	Negative	cELISA	Positive
859	859	Blood, Oropharyngeal swab and cloacal swabs	2017	Hakaluki wetland	Barlekha	Sylhet	Bangladesh	Chattogram Veterinary and Animal Sciences University	Anas platyrhynchos domesticus	Domestic duck	Healthy	Active surveillance	Undefined	Adult	Household	without chicken	136	9	Illitarate	real-time RT-PCR	Negative	cELISA	Positive
860	860	Blood, Oropharyngeal swab and cloacal swabs	2017	Hakaluki wetland	Barlekha	Sylhet	Bangladesh	Chattogram Veterinary and Animal Sciences University	Anas platyrhynchos domesticus	Domestic duck	Healthy	Active surveillance	Undefined	Adult	Household	without chicken	137	6	Illitarate	real-time RT-PCR	Negative	cELISA	Positive
861	861	Blood, Oropharyngeal swab and cloacal swabs	2017	Tanguar wetland	Dharmapasha	Sylhet	Bangladesh	Chattogram Veterinary and Animal Sciences University	Anas platyrhynchos domesticus	Domestic duck	Healthy	Active surveillance	Undefined	Adult	Household	with chicken	138	8	Illitarate	real-time RT-PCR	Negative	cELISA	Positive
862	862	Blood, Oropharyngeal swab and cloacal swabs	2017	Tanguar wetland	Dharmapasha	Sylhet	Bangladesh	Chattogram Veterinary and Animal Sciences University	Anas platyrhynchos domesticus	Domestic duck	Healthy	Active surveillance	Undefined	Adult	Household	with chicken	139	7	Illitarate	real-time RT-PCR	Negative	cELISA	Positive
863	863	Blood, Oropharyngeal swab and cloacal swabs	2017	Tanguar wetland	Dharmapasha	Sylhet	Bangladesh	Chattogram Veterinary and Animal Sciences University	Anas platyrhynchos domesticus	Domestic duck	Healthy	Active surveillance	Undefined	Adult	Household	with chicken	140	5	Illitarate	real-time RT-PCR	Negative	cELISA	Positive
864	864	Blood, Oropharyngeal swab and cloacal swabs	2017	Tanguar wetland	Dharmapasha	Sylhet	Bangladesh	Chattogram Veterinary and Animal Sciences University	Anas platyrhynchos domesticus	Domestic duck	Healthy	Active surveillance	Undefined	Adult	Household	with chicken	141	8	Literate	real-time RT-PCR	Negative	cELISA	Positive
865	865	Blood, Oropharyngeal swab and cloacal swabs	2017	Tanguar wetland	Dharmapasha	Sylhet	Bangladesh	Chattogram Veterinary and Animal Sciences University	Anas platyrhynchos domesticus	Domestic duck	Healthy	Active surveillance	Undefined	Adult	Household	with chicken	142	5	Literate	real-time RT-PCR	Negative	cELISA	Positive
866	866	Blood, Oropharyngeal swab and cloacal swabs	2017	Tanguar wetland	Dharmapasha	Sylhet	Bangladesh	Chattogram Veterinary and Animal Sciences University	Anas platyrhynchos domesticus	Domestic duck	Healthy	Active surveillance	Undefined	Adult	Household	with chicken	143	5	Literate	real-time RT-PCR	Negative	cELISA	Positive
867	867	Blood, Oropharyngeal swab and cloacal swabs	2017	Tanguar wetland	Dharmapasha	Sylhet	Bangladesh	Chattogram Veterinary and Animal Sciences University	Anas platyrhynchos domesticus	Domestic duck	Healthy	Active surveillance	Undefined	Adult	Household	with chicken	144	7	Illitarate	real-time RT-PCR	Negative	cELISA	Positive
868	868	Blood, Oropharyngeal swab and cloacal swabs	2017	Tanguar wetland	Dharmapasha	Sylhet	Bangladesh	Chattogram Veterinary and Animal Sciences University	Anas platyrhynchos domesticus	Domestic duck	Healthy	Active surveillance	Undefined	Adult	Household	with chicken	145	6	Illitarate	real-time RT-PCR	Negative	cELISA	Positive
869	869	Blood, Oropharyngeal swab and cloacal swabs	2017	Tanguar wetland	Dharmapasha	Sylhet	Bangladesh	Chattogram Veterinary and Animal Sciences University	Anas platyrhynchos domesticus	Domestic duck	Healthy	Active surveillance	Undefined	Adult	Household	with chicken	146	8	Illitarate	real-time RT-PCR	Negative	cELISA	Positive
870	870	Blood, Oropharyngeal swab and cloacal swabs	2017	Tanguar wetland	Dharmapasha	Sylhet	Bangladesh	Chattogram Veterinary and Animal Sciences University	Anas platyrhynchos domesticus	Domestic duck	Healthy	Active surveillance	Undefined	Adult	Household	with chicken	147	5	Literate	real-time RT-PCR	Negative	cELISA	Positive
871	871	Blood, Oropharyngeal swab and cloacal swabs	2017	Tanguar wetland	Dharmapasha	Sylhet	Bangladesh	Chattogram Veterinary and Animal Sciences University	Anas platyrhynchos domesticus	Domestic duck	Healthy	Active surveillance	Undefined	Adult	Household	with chicken	148	8	Literate	real-time RT-PCR	Negative	cELISA	Positive
872	872	Blood, Oropharyngeal swab and cloacal swabs	2017	Tanguar wetland	Dharmapasha	Sylhet	Bangladesh	Chattogram Veterinary and Animal Sciences University	Anas platyrhynchos domesticus	Domestic duck	Healthy	Active surveillance	Undefined	Adult	Household	with chicken	149	5	Literate	real-time RT-PCR	Negative	cELISA	Positive
873	873	Blood, Oropharyngeal swab and cloacal swabs	2017	Tanguar wetland	Dharmapasha	Sylhet	Bangladesh	Chattogram Veterinary and Animal Sciences University	Anas platyrhynchos domesticus	Domestic duck	Healthy	Active surveillance	Undefined	Adult	Household	without chicken	150	7	Illitarate	real-time RT-PCR	Negative	cELISA	Positive
874	874	Blood, Oropharyngeal swab and cloacal swabs	2017	Tanguar wetland	Dharmapasha	Sylhet	Bangladesh	Chattogram Veterinary and Animal Sciences University	Anas platyrhynchos domesticus	Domestic duck	Healthy	Active surveillance	Undefined	Adult	Household	without chicken	151	6	Illitarate	real-time RT-PCR	Negative	cELISA	Positive
875	875	Blood, Oropharyngeal swab and cloacal swabs	2017	Tanguar wetland	Dharmapasha	Sylhet	Bangladesh	Chattogram Veterinary and Animal Sciences University	Anas platyrhynchos domesticus	Domestic duck	Healthy	Active surveillance	Undefined	Adult	Household	without chicken	152	9	Illitarate	real-time RT-PCR	Negative	cELISA	Positive
876	876	Blood, Oropharyngeal swab and cloacal swabs	2017	Tanguar wetland	Dharmapasha	Sylhet	Bangladesh	Chattogram Veterinary and Animal Sciences University	Anas platyrhynchos domesticus	Domestic duck	Healthy	Active surveillance	Undefined	Adult	Household	without chicken	153	7	Illitarate	real-time RT-PCR	Negative	cELISA	Positive
877	877	Blood, Oropharyngeal swab and cloacal swabs	2017	Tanguar wetland	Dharmapasha	Sylhet	Bangladesh	Chattogram Veterinary and Animal Sciences University	Anas platyrhynchos domesticus	Domestic duck	Healthy	Active surveillance	Undefined	Adult	Household	with chicken	154	9	Illitarate	real-time RT-PCR	Negative	cELISA	Positive
878	878	Blood, Oropharyngeal swab and cloacal swabs	2017	Tanguar wetland	Dharmapasha	Sylhet	Bangladesh	Chattogram Veterinary and Animal Sciences University	Anas platyrhynchos domesticus	Domestic duck	Healthy	Active surveillance	Undefined	Adult	Household	with chicken	155	8	Literate	real-time RT-PCR	Negative	cELISA	Positive
879	879	Blood, Oropharyngeal swab and cloacal swabs	2017	Tanguar wetland	Dharmapasha	Sylhet	Bangladesh	Chattogram Veterinary and Animal Sciences University	Anas platyrhynchos domesticus	Domestic duck	Healthy	Active surveillance	Undefined	Adult	Household	with chicken	156	6	Literate	real-time RT-PCR	Negative	cELISA	Positive
880	880	Blood, Oropharyngeal swab and cloacal swabs	2017	Tanguar wetland	Dharmapasha	Sylhet	Bangladesh	Chattogram Veterinary and Animal Sciences University	Anas platyrhynchos domesticus	Domestic duck	Healthy	Active surveillance	Undefined	Adult	Household	with chicken	157	5	Literate	real-time RT-PCR	Negative	cELISA	Positive
881	881	Blood, Oropharyngeal swab and cloacal swabs	2017	Tanguar wetland	Dharmapasha	Sylhet	Bangladesh	Chattogram Veterinary and Animal Sciences University	Anas platyrhynchos domesticus	Domestic duck	Healthy	Active surveillance	Undefined	Adult	Household	with chicken	158	7	Literate	real-time RT-PCR	Negative	cELISA	Positive
882	882	Blood, Oropharyngeal swab and cloacal swabs	2017	Tanguar wetland	Dharmapasha	Sylhet	Bangladesh	Chattogram Veterinary and Animal Sciences University	Anas platyrhynchos domesticus	Domestic duck	Healthy	Active surveillance	Undefined	Adult	Household	with chicken	159	5	Literate	real-time RT-PCR	Negative	cELISA	Positive
883	883	Blood, Oropharyngeal swab and cloacal swabs	2017	Tanguar wetland	Dharmapasha	Sylhet	Bangladesh	Chattogram Veterinary and Animal Sciences University	Anas platyrhynchos domesticus	Domestic duck	Healthy	Active surveillance	Undefined	Adult	Household	with chicken	160	7	Literate	real-time RT-PCR	Negative	cELISA	Positive
884	884	Blood, Oropharyngeal swab and cloacal swabs	2017	Tanguar wetland	Dharmapasha	Sylhet	Bangladesh	Chattogram Veterinary and Animal Sciences University	Anas platyrhynchos domesticus	Domestic duck	Healthy	Active surveillance	Undefined	Adult	Household	with chicken	161	6	Literate	real-time RT-PCR	Negative	cELISA	Positive
885	885	Blood, Oropharyngeal swab and cloacal swabs	2017	Tanguar wetland	Dharmapasha	Sylhet	Bangladesh	Chattogram Veterinary and Animal Sciences University	Anas platyrhynchos domesticus	Domestic duck	Healthy	Active surveillance	Undefined	Adult	Household	with chicken	162	8	Illitarate	real-time RT-PCR	Negative	cELISA	Positive
886	886	Blood, Oropharyngeal swab and cloacal swabs	2017	Tanguar wetland	Dharmapasha	Sylhet	Bangladesh	Chattogram Veterinary and Animal Sciences University	Anas platyrhynchos domesticus	Domestic duck	Healthy	Active surveillance	Undefined	Adult	Household	with chicken	163	5	Illitarate	real-time RT-PCR	Negative	cELISA	Positive
887	887	Blood, Oropharyngeal swab and cloacal swabs	2017	Tanguar wetland	Dharmapasha	Sylhet	Bangladesh	Chattogram Veterinary and Animal Sciences University	Anas platyrhynchos domesticus	Domestic duck	Healthy	Active surveillance	Undefined	Adult	Household	without chicken	164	9	Illitarate	real-time RT-PCR	Negative	cELISA	Positive
888	888	Blood, Oropharyngeal swab and cloacal swabs	2017	Tanguar wetland	Dharmapasha	Sylhet	Bangladesh	Chattogram Veterinary and Animal Sciences University	Anas platyrhynchos domesticus	Domestic duck	Healthy	Active surveillance	Undefined	Adult	Household	without chicken	165	6	Illitarate	real-time RT-PCR	Negative	cELISA	Positive
889	889	Blood, Oropharyngeal swab and cloacal swabs	2017	Tanguar wetland	Dharmapasha	Sylhet	Bangladesh	Chattogram Veterinary and Animal Sciences University	Anas platyrhynchos domesticus	Domestic duck	Healthy	Active surveillance	Undefined	Adult	Household	without chicken	166	7	Illitarate	real-time RT-PCR	Negative	cELISA	Positive
890	890	Blood, Oropharyngeal swab and cloacal swabs	2017	Tanguar wetland	Dharmapasha	Sylhet	Bangladesh	Chattogram Veterinary and Animal Sciences University	Anas platyrhynchos domesticus	Domestic duck	Healthy	Active surveillance	Undefined	Adult	Household	without chicken	167	9	Illitarate	real-time RT-PCR	Negative	cELISA	Positive
891	891	Blood, Oropharyngeal swab and cloacal swabs	2017	Tanguar wetland	Dharmapasha	Sylhet	Bangladesh	Chattogram Veterinary and Animal Sciences University	Anas platyrhynchos domesticus	Domestic duck	Healthy	Active surveillance	Undefined	Adult	Household	without chicken	168	5	Illitarate	real-time RT-PCR	Negative	cELISA	Positive
892	892	Blood, Oropharyngeal swab and cloacal swabs	2017	Tanguar wetland	Dharmapasha	Sylhet	Bangladesh	Chattogram Veterinary and Animal Sciences University	Anas platyrhynchos domesticus	Domestic duck	Healthy	Active surveillance	Undefined	Adult	Household	without chicken	169	8	Illitarate	real-time RT-PCR	Negative	cELISA	Negative
893	893	Blood, Oropharyngeal swab and cloacal swabs	2017	Tanguar wetland	Dharmapasha	Sylhet	Bangladesh	Chattogram Veterinary and Animal Sciences University	Anas platyrhynchos domesticus	Domestic duck	Healthy	Active surveillance	Undefined	Adult	Household	without chicken	170	6	Illitarate	real-time RT-PCR	Negative	cELISA	Positive
894	894	Blood, Oropharyngeal swab and cloacal swabs	2017	Tanguar wetland	Dharmapasha	Sylhet	Bangladesh	Chattogram Veterinary and Animal Sciences University	Anas platyrhynchos domesticus	Domestic duck	Healthy	Active surveillance	Undefined	Adult	Household	without chicken	171	9	Literate	real-time RT-PCR	Negative	cELISA	Positive
895	895	Blood, Oropharyngeal swab and cloacal swabs	2017	Tanguar wetland	Dharmapasha	Sylhet	Bangladesh	Chattogram Veterinary and Animal Sciences University	Anas platyrhynchos domesticus	Domestic duck	Healthy	Active surveillance	Undefined	Adult	Household	without chicken	172	6	Literate	real-time RT-PCR	Negative	cELISA	Positive
896	896	Blood, Oropharyngeal swab and cloacal swabs	2017	Tanguar wetland	Dharmapasha	Sylhet	Bangladesh	Chattogram Veterinary and Animal Sciences University	Anas platyrhynchos domesticus	Domestic duck	Healthy	Active surveillance	Undefined	Adult	Household	without chicken	173	5	Literate	real-time RT-PCR	Negative	cELISA	Positive
897	897	Blood, Oropharyngeal swab and cloacal swabs	2017	Tanguar wetland	Dharmapasha	Sylhet	Bangladesh	Chattogram Veterinary and Animal Sciences University	Anas platyrhynchos domesticus	Domestic duck	Healthy	Active surveillance	Undefined	Adult	Household	without chicken	174	8	Literate	real-time RT-PCR	Negative	cELISA	Negative
898	898	Blood, Oropharyngeal swab and cloacal swabs	2017	Tanguar wetland	Dharmapasha	Sylhet	Bangladesh	Chattogram Veterinary and Animal Sciences University	Anas platyrhynchos domesticus	Domestic duck	Healthy	Active surveillance	Undefined	Adult	Household	without chicken	175	10	Illitarate	real-time RT-PCR	Negative	cELISA	Positive
899	899	Blood, Oropharyngeal swab and cloacal swabs	2017	Tanguar wetland	Dharmapasha	Sylhet	Bangladesh	Chattogram Veterinary and Animal Sciences University	Anas platyrhynchos domesticus	Domestic duck	Healthy	Active surveillance	Undefined	Adult	Household	without chicken	176	6	Illitarate	real-time RT-PCR	Negative	cELISA	Negative
900	900	Blood, Oropharyngeal swab and cloacal swabs	2017	Tanguar wetland	Dharmapasha	Sylhet	Bangladesh	Chattogram Veterinary and Animal Sciences University	Anas platyrhynchos domesticus	Domestic duck	Healthy	Active surveillance	Undefined	Adult	Household	without chicken	177	5	Illitarate	real-time RT-PCR	Negative	cELISA	Negative
901	901	Blood, Oropharyngeal swab and cloacal swabs	2017	Tanguar wetland	Dharmapasha	Sylhet	Bangladesh	Chattogram Veterinary and Animal Sciences University	Anas platyrhynchos domesticus	Domestic duck	Healthy	Active surveillance	Undefined	Adult	Household	without chicken	178	11	Illitarate	real-time RT-PCR	Negative	cELISA	Negative
902	902	Blood, Oropharyngeal swab and cloacal swabs	2017	Tanguar wetland	Dharmapasha	Sylhet	Bangladesh	Chattogram Veterinary and Animal Sciences University	Anas platyrhynchos domesticus	Domestic duck	Healthy	Active surveillance	Undefined	Adult	Household	without chicken	179	7	Illitarate	real-time RT-PCR	Negative	cELISA	Negative
903	903	Blood, Oropharyngeal swab and cloacal swabs	2017	Tanguar wetland	Dharmapasha	Sylhet	Bangladesh	Chattogram Veterinary and Animal Sciences University	Anas platyrhynchos domesticus	Domestic duck	Healthy	Active surveillance	Undefined	Adult	Household	without chicken	180	8	Literate	real-time RT-PCR	Negative	cELISA	Negative
904	904	Blood, Oropharyngeal swab and cloacal swabs	2017	Tanguar wetland	Barhatta	Sylhet	Bangladesh	Chattogram Veterinary and Animal Sciences University	Anas platyrhynchos domesticus	Domestic duck	Healthy	Active surveillance	Undefined	Adult	Household	without chicken	181	5	Literate	real-time RT-PCR	Negative	cELISA	Negative
905	905	Blood, Oropharyngeal swab and cloacal swabs	2017	Tanguar wetland	Barhatta	Sylhet	Bangladesh	Chattogram Veterinary and Animal Sciences University	Anas platyrhynchos domesticus	Domestic duck	Healthy	Active surveillance	Undefined	Adult	Household	without chicken	182	9	Literate	real-time RT-PCR	Negative	cELISA	Negative
906	906	Blood, Oropharyngeal swab and cloacal swabs	2017	Tanguar wetland	Barhatta	Sylhet	Bangladesh	Chattogram Veterinary and Animal Sciences University	Anas platyrhynchos domesticus	Domestic duck	Healthy	Active surveillance	Undefined	Adult	Household	without chicken	183	5	Literate	real-time RT-PCR	Negative	cELISA	Negative
907	907	Blood, Oropharyngeal swab and cloacal swabs	2017	Tanguar wetland	Barhatta	Sylhet	Bangladesh	Chattogram Veterinary and Animal Sciences University	Anas platyrhynchos domesticus	Domestic duck	Healthy	Active surveillance	Undefined	Adult	Household	with chicken	184	7	Literate	real-time RT-PCR	Negative	cELISA	Negative
908	908	Blood, Oropharyngeal swab and cloacal swabs	2017	Tanguar wetland	Barhatta	Sylhet	Bangladesh	Chattogram Veterinary and Animal Sciences University	Anas platyrhynchos domesticus	Domestic duck	Healthy	Active surveillance	Undefined	Adult	Household	with chicken	185	6	Literate	real-time RT-PCR	Negative	cELISA	Negative
909	909	Blood, Oropharyngeal swab and cloacal swabs	2017	Tanguar wetland	Barhatta	Sylhet	Bangladesh	Chattogram Veterinary and Animal Sciences University	Anas platyrhynchos domesticus	Domestic duck	Healthy	Active surveillance	Undefined	Adult	Household	with chicken	186	9	Literate	real-time RT-PCR	Negative	cELISA	Positive
910	910	Blood, Oropharyngeal swab and cloacal swabs	2017	Tanguar wetland	Barhatta	Sylhet	Bangladesh	Chattogram Veterinary and Animal Sciences University	Anas platyrhynchos domesticus	Domestic duck	Healthy	Active surveillance	Undefined	Adult	Household	with chicken	187	10	Literate	real-time RT-PCR	Negative	cELISA	Positive
911	911	Blood, Oropharyngeal swab and cloacal swabs	2017	Tanguar wetland	Barhatta	Sylhet	Bangladesh	Chattogram Veterinary and Animal Sciences University	Anas platyrhynchos domesticus	Domestic duck	Healthy	Active surveillance	Undefined	Adult	Household	with chicken	188	5	Literate	real-time RT-PCR	Negative	cELISA	Positive
912	912	Blood, Oropharyngeal swab and cloacal swabs	2017	Tanguar wetland	Barhatta	Sylhet	Bangladesh	Chattogram Veterinary and Animal Sciences University	Anas platyrhynchos domesticus	Domestic duck	Healthy	Active surveillance	Undefined	Adult	Household	with chicken	189	9	Literate	real-time RT-PCR	Negative	cELISA	Positive
913	913	Blood, Oropharyngeal swab and cloacal swabs	2017	Tanguar wetland	Barhatta	Sylhet	Bangladesh	Chattogram Veterinary and Animal Sciences University	Anas platyrhynchos domesticus	Domestic duck	Healthy	Active surveillance	Undefined	Adult	Household	with chicken	190	8	Literate	real-time RT-PCR	Negative	cELISA	Positive
914	914	Blood, Oropharyngeal swab and cloacal swabs	2017	Tanguar wetland	Barhatta	Sylhet	Bangladesh	Chattogram Veterinary and Animal Sciences University	Anas platyrhynchos domesticus	Domestic duck	Healthy	Active surveillance	Undefined	Adult	Household	with chicken	191	5	Illitarate	real-time RT-PCR	Negative	cELISA	Positive
915	915	Blood, Oropharyngeal swab and cloacal swabs	2017	Tanguar wetland	Barhatta	Sylhet	Bangladesh	Chattogram Veterinary and Animal Sciences University	Anas platyrhynchos domesticus	Domestic duck	Healthy	Active surveillance	Undefined	Adult	Household	with chicken	192	7	Illitarate	real-time RT-PCR	Negative	cELISA	Positive
916	916	Blood, Oropharyngeal swab and cloacal swabs	2017	Tanguar wetland	Barhatta	Sylhet	Bangladesh	Chattogram Veterinary and Animal Sciences University	Anas platyrhynchos domesticus	Domestic duck	Healthy	Active surveillance	Undefined	Adult	Household	with chicken	193	6	Literate	real-time RT-PCR	Negative	cELISA	Positive
917	917	Blood, Oropharyngeal swab and cloacal swabs	2017	Hakaluki wetland	Barlekha	Sylhet	Bangladesh	Chattogram Veterinary and Animal Sciences University	Anas platyrhynchos domesticus	Domestic duck	Healthy	Active surveillance	Undefined	Adult	Household	with chicken	194	8	Literate	real-time RT-PCR	Positive	cELISA	Negative	MT512577
918	918	Blood, Oropharyngeal swab and cloacal swabs	2017	Hakaluki wetland	Barlekha	Sylhet	Bangladesh	Chattogram Veterinary and Animal Sciences University	Anas platyrhynchos domesticus	Domestic duck	Healthy	Active surveillance	Undefined	Adult	Household	with chicken	195	10	Illitarate	real-time RT-PCR	Positive	cELISA	Positive	MT512578
919	919	Blood, Oropharyngeal swab and cloacal swabs	2017	Hakaluki wetland	Bhatera	Sylhet	Bangladesh	Chattogram Veterinary and Animal Sciences University	Anas platyrhynchos domesticus	Domestic duck	Healthy	Active surveillance	Undefined	Adult	Household	with chicken	196	7	Illitarate	real-time RT-PCR	Positive	cELISA	Negative	MT512579
920	920	Blood, Oropharyngeal swab and cloacal swabs	2017	Hakaluki wetland	Bhatera	Sylhet	Bangladesh	Chattogram Veterinary and Animal Sciences University	Anas platyrhynchos domesticus	Domestic duck	Healthy	Active surveillance	Undefined	Adult	Household	with chicken	197	9	Illitarate	real-time RT-PCR	Positive	cELISA	Positive	MT512580
921	921	Blood, Oropharyngeal swab and cloacal swabs	2017	Hakaluki wetland	Bhatera	Sylhet	Bangladesh	Chattogram Veterinary and Animal Sciences University	Anas platyrhynchos domesticus	Domestic duck	Healthy	Active surveillance	Undefined	Adult	Household	with chicken	198	7	Illitarate	real-time RT-PCR	Positive	cELISA	Negative	MT512581
922	922	Blood, Oropharyngeal swab and cloacal swabs	2017	Hakaluki wetland	Bhatera	Sylhet	Bangladesh	Chattogram Veterinary and Animal Sciences University	Anas platyrhynchos domesticus	Domestic duck	Healthy	Active surveillance	Undefined	Adult	Household	with chicken	199	8	Illitarate	real-time RT-PCR	Positive	cELISA	Negative
923	923	Blood, Oropharyngeal swab and cloacal swabs	2017	Tanguar wetland	Jamalganj	Sylhet	Bangladesh	Chattogram Veterinary and Animal Sciences University	Anas platyrhynchos domesticus	Domestic duck	Healthy	Active surveillance	Undefined	Adult	Free-range domestic	waterfowl	19	310	Illitarate	real-time RT-PCR	Positive	cELISA	Positive
924	924	Blood, Oropharyngeal swab and cloacal swabs	2017	Tanguar wetland	Jamalganj	Sylhet	Bangladesh	Chattogram Veterinary and Animal Sciences University	Anas platyrhynchos domesticus	Domestic duck	Healthy	Active surveillance	Undefined	Adult	Free-range domestic	waterfowl	19	310	Illitarate	real-time RT-PCR	Positive	cELISA	Positive
925	925	Blood, Oropharyngeal swab and cloacal swabs	2017	Tanguar wetland	Barhatta	Sylhet	Bangladesh	Chattogram Veterinary and Animal Sciences University	Anas platyrhynchos domesticus	Domestic duck	Healthy	Active surveillance	Undefined	Adult	Household	with chicken	200	10	Literate	real-time RT-PCR	Positive	cELISA	Positive	MT512582
926	926	Blood, Oropharyngeal swab and cloacal swabs	2017	Tanguar wetland	Barhatta	Sylhet	Bangladesh	Chattogram Veterinary and Animal Sciences University	Anas platyrhynchos domesticus	Domestic duck	Healthy	Active surveillance	Undefined	Adult	Household	with chicken	201	11	Literate	real-time RT-PCR	Positive	cELISA	Positive	MT512583
927	927	Blood, Oropharyngeal swab and cloacal swabs	2017	Tanguar wetland	Barhatta	Sylhet	Bangladesh	Chattogram Veterinary and Animal Sciences University	Anas platyrhynchos domesticus	Domestic duck	Healthy	Active surveillance	Undefined	Adult	Household	with chicken	202	7	Illitarate	real-time RT-PCR	Positive	cELISA	Positive
928	928	Blood, Oropharyngeal swab and cloacal swabs	2017	Tanguar wetland	Barhatta	Sylhet	Bangladesh	Chattogram Veterinary and Animal Sciences University	Anas platyrhynchos domesticus	Domestic duck	Healthy	Active surveillance	Undefined	Adult	Household	with chicken	203	5	Literate	real-time RT-PCR	Positive	cELISA	Positive
929	929	Blood, Oropharyngeal swab and cloacal swabs	2017	Tanguar wetland	Barhatta	Sylhet	Bangladesh	Chattogram Veterinary and Animal Sciences University	Anas platyrhynchos domesticus	Domestic duck	Healthy	Active surveillance	Undefined	Adult	Household	with chicken	204	9	Literate	real-time RT-PCR	Positive	cELISA	Positive
930	930	Blood, Oropharyngeal swab and cloacal swabs	2017	Tanguar wetland	Barhatta	Sylhet	Bangladesh	Chattogram Veterinary and Animal Sciences University	Anas platyrhynchos domesticus	Domestic duck	Healthy	Active surveillance	Undefined	Adult	Free-range domestic	waterfowl	20	790	Illitarate	real-time RT-PCR	Positive	cELISA	Negative	MT512584
931	931	Blood, Oropharyngeal swab and cloacal swabs	2017	Tanguar wetland	Barhatta	Sylhet	Bangladesh	Chattogram Veterinary and Animal Sciences University	Anas platyrhynchos domesticus	Domestic duck	Healthy	Active surveillance	Undefined	Adult	Free-range domestic	waterfowl	20	790	Illitarate	real-time RT-PCR	Positive	cELISA	Positive	MT512585
932	932	Blood, Oropharyngeal swab and cloacal swabs	2017	Tanguar wetland	Barhatta	Sylhet	Bangladesh	Chattogram Veterinary and Animal Sciences University	Anas platyrhynchos domesticus	Domestic duck	Healthy	Active surveillance	Undefined	Adult	Free-range domestic	waterfowl	20	790	Illitarate	real-time RT-PCR	Positive	cELISA	Positive	MT512586
933	933	Blood, Oropharyngeal swab and cloacal swabs	2017	Tanguar wetland	Barhatta	Sylhet	Bangladesh	Chattogram Veterinary and Animal Sciences University	Anas platyrhynchos domesticus	Domestic duck	Healthy	Active surveillance	Undefined	Adult	Free-range domestic	waterfowl	20	790	Illitarate	real-time RT-PCR	Positive	cELISA	Negative
934	934	Blood, Oropharyngeal swab and cloacal swabs	2017	Tanguar wetland	Barhatta	Sylhet	Bangladesh	Chattogram Veterinary and Animal Sciences University	Anas platyrhynchos domesticus	Domestic duck	Healthy	Active surveillance	Undefined	Adult	Free-range domestic	waterfowl	20	790	Illitarate	real-time RT-PCR	Positive	cELISA	Negative
935	935	Blood, Oropharyngeal swab and cloacal swabs	2017	Hakaluki wetland	Bhatera	Sylhet	Bangladesh	Chattogram Veterinary and Animal Sciences University	Anas platyrhynchos domesticus	Domestic duck	Healthy	Active surveillance	Undefined	Adult	Household	with chicken	205	6	Illitarate	real-time RT-PCR	Positive	cELISA	Negative
936	936	Blood, Oropharyngeal swab and cloacal swabs	2017	Hakaluki wetland	Bhatera	Sylhet	Bangladesh	Chattogram Veterinary and Animal Sciences University	Anas platyrhynchos domesticus	Domestic duck	Healthy	Active surveillance	Undefined	Adult	Household	with chicken	206	5	Illitarate	real-time RT-PCR	Positive	cELISA	Positive
937	937	Blood, Oropharyngeal swab and cloacal swabs	2017	Hakaluki wetland	Bhatera	Sylhet	Bangladesh	Chattogram Veterinary and Animal Sciences University	Anas platyrhynchos domesticus	Domestic duck	Healthy	Active surveillance	Undefined	Adult	Household	with chicken	207	8	Illitarate	real-time RT-PCR	Positive	cELISA	Negative
938	938	Blood, Oropharyngeal swab and cloacal swabs	2017	Hakaluki wetland	Bhatera	Sylhet	Bangladesh	Chattogram Veterinary and Animal Sciences University	Anas platyrhynchos domesticus	Domestic duck	Healthy	Active surveillance	Undefined	Adult	Household	with chicken	208	7	Illitarate	real-time RT-PCR	Positive	cELISA	Positive
939	939	Blood, Oropharyngeal swab and cloacal swabs	2017	Hakaluki wetland	Bhatera	Sylhet	Bangladesh	Chattogram Veterinary and Animal Sciences University	Anas platyrhynchos domesticus	Domestic duck	Healthy	Active surveillance	Undefined	Adult	Household	with chicken	209	9	Illitarate	real-time RT-PCR	Positive	cELISA	Negative
940	940	Blood, Oropharyngeal swab and cloacal swabs	2017	Hakaluki wetland	Bhatera	Sylhet	Bangladesh	Chattogram Veterinary and Animal Sciences University	Anas platyrhynchos domesticus	Domestic duck	Healthy	Active surveillance	Undefined	Adult	Household	with chicken	210	6	Illitarate	real-time RT-PCR	Positive	cELISA	Negative
941	941	Blood, Oropharyngeal swab and cloacal swabs	2017	Hakaluki wetland	Bhatera	Sylhet	Bangladesh	Chattogram Veterinary and Animal Sciences University	Anas platyrhynchos domesticus	Domestic duck	Healthy	Active surveillance	Undefined	Adult	Household	with chicken	211	8	Illitarate	real-time RT-PCR	Positive	cELISA	Negative
942	942	Blood, Oropharyngeal swab and cloacal swabs	2017	Tanguar wetland	Barhatta	Sylhet	Bangladesh	Chattogram Veterinary and Animal Sciences University	Anas platyrhynchos domesticus	Domestic duck	Healthy	Active surveillance	Undefined	Adult	Household	with chicken	212	10	Literate	real-time RT-PCR	Positive	cELISA	Positive
943	943	Blood, Oropharyngeal swab and cloacal swabs	2017	Tanguar wetland	Barhatta	Sylhet	Bangladesh	Chattogram Veterinary and Animal Sciences University	Anas platyrhynchos domesticus	Domestic duck	Healthy	Active surveillance	Undefined	Adult	Household	with chicken	213	6	Literate	real-time RT-PCR	Positive	cELISA	Positive
944	944	Blood, Oropharyngeal swab and cloacal swabs	2017	Tanguar wetland	Barhatta	Sylhet	Bangladesh	Chattogram Veterinary and Animal Sciences University	Anas platyrhynchos domesticus	Domestic duck	Healthy	Active surveillance	Undefined	Adult	Household	with chicken	214	12	Literate	real-time RT-PCR	Positive	cELISA	Positive
945	945	Blood, Oropharyngeal swab and cloacal swabs	2017	Tanguar wetland	Barhatta	Sylhet	Bangladesh	Chattogram Veterinary and Animal Sciences University	Anas platyrhynchos domesticus	Domestic duck	Healthy	Active surveillance	Undefined	Adult	Household	with chicken	215	8	Literate	real-time RT-PCR	Positive	cELISA	Positive
946	946	Blood, Oropharyngeal swab and cloacal swabs	2017	Tanguar wetland	Barhatta	Sylhet	Bangladesh	Chattogram Veterinary and Animal Sciences University	Anas platyrhynchos domesticus	Domestic duck	Healthy	Active surveillance	Undefined	Adult	Household	with chicken	216	6	Literate	real-time RT-PCR	Positive	cELISA	Positive
947	947	Blood, Oropharyngeal swab and cloacal swabs	2017	Tanguar wetland	Barhatta	Sylhet	Bangladesh	Chattogram Veterinary and Animal Sciences University	Anas platyrhynchos domesticus	Domestic duck	Healthy	Active surveillance	Undefined	Adult	Household	with chicken	217	8	Literate	real-time RT-PCR	Positive	cELISA	Positive
